# Supplementary material
Source: Springer Nature journal article supplement (https://www.springermedizin.de/resource/supplementary/12879_2012_2748_MOESM1_ESM.pdf/9445318)
Supplement: MOESM1 [file 9445318]

**A4 LIST OF INVESTIGATORS AND CORRESPONDING ETHICS COMMITTEES OR INSTITUTIONAL REVIEW BOARDS**

**Argentina**

**Coordinating Investigators:**

<None Entered>

| <u>Center</u> | <u>Principal Investigator</u> | <u>Co-Investigator(s)</u> | <u>Sub-Investigator(s)</u>                                                                                                                  | <u>Address(es)</u>                                                                                                                                             | <u>Institutional Review Board or Ethics Committee Address(es)</u>                                                                                                                                                                                                                                                                                                                                                                                                                                                |
|---------------|-------------------------------|---------------------------|---------------------------------------------------------------------------------------------------------------------------------------------|----------------------------------------------------------------------------------------------------------------------------------------------------------------|------------------------------------------------------------------------------------------------------------------------------------------------------------------------------------------------------------------------------------------------------------------------------------------------------------------------------------------------------------------------------------------------------------------------------------------------------------------------------------------------------------------|
| 1056 *        | Dra. Maria Cristina De Salvo  |                           | Dr. Miriam Ines Burgos<br>Dr. Rita Gisela Delgado Vizcarra<br>Ms Florencia Fernandez<br>Dr Ana Maria Molina<br>Dr. Viviana Monica Rodriguez | Hospital General de Agudos "Dr E Tornu", Division Neumotisiologia<br>1er Piso<br>Combatiente de Malvinas 3002<br>Pabellon 3<br>Buenos Aires, 1427<br>ARGENTINA | Comite de Bioetica<br>Hospital General de Agudos Enrique Tornu<br>Combatientes de Malvinas 3002<br>Capitol Federal, 1427<br>ARGENTINA<br><br>Comite Independiente de Etica para Ensayos en Farmacologia Clinica<br>Fundación de Estudios Farmacologicos y de Medicamentos (FEFyM)<br>Uriburu 774- Piso 1°<br>Buenos Aires, 1027<br>ARGENTINA<br><br>Comité de Docencia e Investigación -<br>Hospital General de Agudos "Dr. Enrique Tornu"<br>Combatiente de Malvinas 3002<br>Capital Federal, 1427<br>ARGENTINA |

090177e1816ca80c\Approved\Approved On: 06-Oct-2010 15:16

\* Did not randomize subjects

| <u>Center</u> | <u>Principal Investigator</u> | <u>Co-Investigator(s)</u> | <u>Sub-Investigator(s)</u>                                                                                                                     | <u>Address(es)</u>                                                              | <u>Institutional Review Board or Ethics Committee Address(es)</u>                                                                                                                                                                                                                                                                 |
|---------------|-------------------------------|---------------------------|------------------------------------------------------------------------------------------------------------------------------------------------|---------------------------------------------------------------------------------|-----------------------------------------------------------------------------------------------------------------------------------------------------------------------------------------------------------------------------------------------------------------------------------------------------------------------------------|
| 1058 *        | Dr. German Ambasch            |                           | Dr. Hilda R. Cabrera<br>Dr. Monica A. Chiarlo<br>MS Maria Cecilia Giavedoni<br>Dr. Miriam A. Maldonado<br>Dr. Marcos Marino<br>Nora B. Peralta | Sanatorio Mayo<br>Belgrano 54<br>Cordoba, 5000<br>ARGENTINA                     | Comite Independiente de Etica para Ensayos en Farmacologia Clinica<br>Fundación de Estudios Farmacologicos y de Medicamentos (FEFyM)<br>Uriburu 774- Piso 1°<br>Buenos Aires, 1027<br>ARGENTINA<br><br>Comité de Ética Sanatorio Mayo Privado S.A.<br>Belgrano 54<br>Cordoba, 5000<br>ARGENTINA                                   |
| 1059          | Dr. Liliana Clara             |                           | Dr Martin Rodrigo Ajzenszloz<br>Dr Laura Barcan<br>Dr. Waldo Beloso<br>Dr. Marisa del Lujan Sanchez<br>Dr. Alejandra Valledor                  | Hospital Italiano<br>Gascon 450<br>Buenos Aires, BUENOS AIRES 1181<br>ARGENTINA | Comite de Etica de Protocolos de Investigacion<br>Hospital Italiano<br>Gascon 450 (C1181ACH)<br>Buenos Aires,<br>ARGENTINA<br><br>Comite Independiente de Etica para Ensayos en Farmacologia Clinica<br>Fundación de Estudios Farmacologicos y de Medicamentos (FEFyM)<br>Uriburu 774- Piso 1°<br>Buenos Aires, 1027<br>ARGENTINA |

090177e1816ca80c\Approved\Approved On: 06-Oct-2010 15:16

\* Did not randomize subjects

**Belgium****Coordinating Investigators:**

&lt;None Entered&gt;

| <u>Center</u> | <u>Principal Investigator</u> | <u>Co-Investigator(s)</u> | <u>Sub-Investigator(s)</u>                                                                                                                                                                                                                                                    | <u>Address(es)</u>                                                                                                                                      | <u>Institutional Review Board or Ethics Committee Address(es)</u>                                                           |
|---------------|-------------------------------|---------------------------|-------------------------------------------------------------------------------------------------------------------------------------------------------------------------------------------------------------------------------------------------------------------------------|---------------------------------------------------------------------------------------------------------------------------------------------------------|-----------------------------------------------------------------------------------------------------------------------------|
| 1110          | Prof. Jean-louis Vincent      |                           | Dr. Yves Bouckaert<br>Silvia Sanchez Morcillo                                                                                                                                                                                                                                 | Hopital Erasme/Service des Soins Intensifs<br>Route de Lennik 808<br>Brussels, 1070<br>BELGIUM                                                          | Ethics Committee Erasme Hospital<br>Ethics Committee Erasme Hospital<br>808, Route de Lennik<br>Brussels, B-1070<br>BELGIUM |
| 1111          | Dr. Koenraad Vandewoude       |                           | Dominique Benoit<br>Kirsten Colpaert<br>Dr. Jan W. De Waele<br>Dr. Annick De Wolf<br>Johan Decruyenaere<br>Pieter Depuydt<br>Dr. Jan Heerman<br>Dr. Ingrid Herck<br>Dr. Eric Hoste<br>Dr. Joke Nollet<br>Sandra Oeyen<br>Jan Poelaert<br>Carl Roosens<br>Prof. Dirk Vogelaers | Universitair Ziekenhuis Gent - Afdeling Intensieve Zorgen<br>MICU-Kliniekgebouw 12<br>12de verdieping B, De Pintelaan 185<br>Gent, 9000<br>BELGIUM      | Ethics Committee Erasme Hospital<br>Ethics Committee Erasme Hospital<br>808, Route de Lennik<br>Brussels, B-1070<br>BELGIUM |
| 1112          | Prof. Pierre Damas            |                           | Dr. Jean-luc Canivet<br>Dr. Didier Ledoux<br>Dr. Paul Massion<br>Dr. Sonia Piret<br>Dr. Jean-Charles Preiser                                                                                                                                                                  | Service des soins intensifs Generaux<br>Centre Hospitalier Universitaire de Liege<br>Domaine Universitaire du Sart-Tilman<br>LIEGE 1, B-4000<br>BELGIUM | Ethics Committee Erasme Hospital<br>Ethics Committee Erasme Hospital<br>808, Route de Lennik<br>Brussels, B-1070<br>BELGIUM |

090177e1816ca80c\Approved\Approved On: 06-Oct-2010 15:16

\* Did not randomize subjects

6-Oct-2010 09:23

| <u>Center</u> | <u>Principal Investigator</u> | <u>Co-Investigator(s)</u> | <u>Sub-Investigator(s)</u>                                      | <u>Address(es)</u>                                                                                                                                                                                                                                                                                                                                | <u>Institutional Review Board or Ethics Committee Address(es)</u>                                                        |
|---------------|-------------------------------|---------------------------|-----------------------------------------------------------------|---------------------------------------------------------------------------------------------------------------------------------------------------------------------------------------------------------------------------------------------------------------------------------------------------------------------------------------------------|--------------------------------------------------------------------------------------------------------------------------|
| 1185          | Dr. Stefaan J. Vandecasteele  |                           | Dr. An S. De Vriese<br>Dr. Marc Nauwynck<br>Dr. Achiel Van Hoof | AZ Sint-Jan AV<br>Dept Internal Medicine,<br>Infectious Diseases and<br>Nephrology<br>Ruddershove 10<br>Brugge, 8000<br>BELGIUM<br><br>AZ Sint-Jan AV<br>Department Intensive Care<br>Ruddershove 10<br>Brugge, 8000<br>BELGIUM<br><br>AZ Sint-Jan AV<br>Department Internal Medicine,<br>Hematology<br>ruddershove 10<br>Brugge, 8000<br>BELGIUM | Université Libre de Bruxelles/Hôpital<br>Erasme<br>Comité d'Ethique<br>Route de Lennik 808<br>Bruxelles, 1070<br>BELGIUM |

090177e1816ca80c\Approved\Approved On: 06-Oct-2010 15:16

\* Did not randomize subjects

**Brazil****Coordinating Investigators:**

&lt;None Entered&gt;

| <u>Center</u> | <u>Principal Investigator</u>  | <u>Co-Investigator(s)</u> | <u>Sub-Investigator(s)</u>                                                                                                | <u>Address(es)</u>                                                                                                                                                          | <u>Institutional Review Board or Ethics Committee Address(es)</u>                                                                                                                      |
|---------------|--------------------------------|---------------------------|---------------------------------------------------------------------------------------------------------------------------|-----------------------------------------------------------------------------------------------------------------------------------------------------------------------------|----------------------------------------------------------------------------------------------------------------------------------------------------------------------------------------|
| 1062 *        | Eduardo A. Servolo<br>Medeiros |                           | Ms. Nancy C. J. Bellei<br>Guilherme Henrique<br>Furtado<br>Graziela Lanzara<br>Fernando Gatti Menezes<br>Luiz H. Ota      | Hospital São Paulo da Escola<br>Paulista de Medicina - UNIFESP<br>Rua Napoleão de Barros, 690<br>2º andar - Vila Clementino<br>São Paulo, SP 04024-002<br>BRAZIL            | Comite de Etica em Pesquisa da<br>Universidade Federal de Sao Paulo -<br>EPM / HSP<br>Rua Botucatu, 572 - Conj. 14 e 41<br>Vila Clementino<br>São Paulo, SP 04023-062<br>BRAZIL        |
| 1063 *        | Edson Abdala                   |                           | Patricia Rodrigues<br>Bonazzi<br>Fernanda Betti Maffei<br>Eduardo A. Servolo<br>Medeiros<br>Glaucaia Fernanda<br>Varkulja | Hospital das Clínicas da<br>Faculdade de Medicina da Univ.<br>de São Paulo<br>Av. Dr. Arnaldo, 455 - 3º andar<br>Transplante de Fígado<br>São Paulo, SP 01246-000<br>BRAZIL | Comissão de Ética para Análise de<br>Projetos de Pesquisa CAPPesq<br>Rua Dr. Ovídio Pires de Campos,<br>225 - Sala 505<br>Prédio da Administração<br>São Paulo, SP 05403-010<br>BRAZIL |
| 1065 *        | Dr. Clovis Arns da Cunha       |                           | Jaime L. L. Rocha<br>Dr. Monica Maria Gomes<br>da Silva<br>Paula Virgina Michelin<br>Toledo                               | Hospital Vita<br>Rodovia BR 116, Km. 396 - nº<br>4021<br>Bairro Alto<br>Curitiba, PR 82590-100<br>BRAZIL                                                                    | Comite de Etica em Pesquisa em<br>Seres Humanos do HC-UFPR<br>Rua General Carneiro, 181<br>Curitiba, PR 80060-900<br>BRAZIL                                                            |

| <u>Center</u> | <u>Principal Investigator</u>    | <u>Co-Investigator(s)</u> | <u>Sub-Investigator(s)</u>                                                                                                                                                                                                                                                          | <u>Address(es)</u>                                                                                                                                                                                      | <u>Institutional Review Board or Ethics Committee Address(es)</u>                                                                                                                                |
|---------------|----------------------------------|---------------------------|-------------------------------------------------------------------------------------------------------------------------------------------------------------------------------------------------------------------------------------------------------------------------------------|---------------------------------------------------------------------------------------------------------------------------------------------------------------------------------------------------------|--------------------------------------------------------------------------------------------------------------------------------------------------------------------------------------------------|
| 1067          | Dr. Luis Fernando Aranha Camargo |                           | Silvana Maria Almeida<br>Erika M K Andrade<br>Mauricio Beller Ferri<br>Liou Hsing Ling<br>Dr. Tatiana Mohovic<br>Dr. Rogério H Passos<br>Dr. Adriano J. Pereira<br>Dr. Janaina S Ricardo<br>Dr. Moacyr Silva Junior<br>Ana Maria Beltrami<br>Sogayar<br>Camila Paiva de Vasconcelos | Sociedade Beneficente Israelita Brasileira Hospital Albert Einstein<br>Av. Albert Einstein, 627<br>São Paulo, SP 05651-901<br>BRAZIL                                                                    | Comite de Etica em Pesquisa do Hospital Israelita Albert Einstein<br>Av. Albert Einstein, 627<br>Morumbi<br>São Paulo, SP 05651-901<br>BRAZIL                                                    |
| 1178          | Dr. Fernando Gongora Rubio       |                           | Dr. Delzi V. N. Gongora<br>Lauriane G. Leite<br>Luana Sousa Marques<br>Dr. Maria G. de Lucca Oliveira<br>Lilian F. Prado<br>Dr. Livia S. Rodrigues<br>Dr. Wilson J. Q. Santos<br>Alcides Pinto de Souza Junior                                                                      | Hospital de Base ç Fundacao Faculdade Regional de Medicina de Sao Jose do Rio Preto (FUNFARME)<br>Av. Brigadeiro Faria Lima, 5544<br>Jd. Universitario<br>Sao Jose do Rio Preto, SP 15090-000<br>BRAZIL | Comite de Etica em Pesquisa da Faculdade de Medicina de Sao Jose do Rio Preto FAMERP<br>Av. Brigadeiro Faria Lima, 5416<br>Jardim Universitario<br>Sao Jose do Rio Preto, SP 15090-000<br>BRAZIL |
| 1232 *        | Dr. Áurea A. Paste               |                           | Dr. José R. M. de Almeida<br>Gedelias B. Nóbrega<br>Dr. Giovanna de S. Orrico<br>Mônica J. S. Silva<br>Jamile N. de Souza                                                                                                                                                           | Hospital Santa Izabel - Santa Casa de Misericórdia da Bahia<br>Praça Conselheiro Almeida Couto, 500<br>Nazaré<br>Salvador, BA 40050-410<br>BRAZIL                                                       | Comitê de Ética em Pesquisa Prof. Dr. Celso Figueirôa - Hospital Santa Izabel<br>Praça Conselheiro Almeida Couto, 500<br>Nazaré<br>Salvador, Bahia 40050-410<br>BRAZIL                           |

\* Did not randomize subjects

| <u>Center</u> | <u>Principal Investigator</u>          | <u>Co-Investigator(s)</u> | <u>Sub-Investigator(s)</u>                                                                                                                              | <u>Address(es)</u>                                                                                                                                                                        | <u>Institutional Review Board or Ethics Committee Address(es)</u>                                                                                                                                                                                  |
|---------------|----------------------------------------|---------------------------|---------------------------------------------------------------------------------------------------------------------------------------------------------|-------------------------------------------------------------------------------------------------------------------------------------------------------------------------------------------|----------------------------------------------------------------------------------------------------------------------------------------------------------------------------------------------------------------------------------------------------|
| 1233          | Edson D. Moreira Jr                    |                           | Elisangela Brito Almeida<br>Debora O. R. Bonfim<br>Dr. Ricardo A. Chalhub<br>Dr. Gustavo G. V. Sampaio<br>Diego S C da Silva<br>Dr. Gustavo M. Tanajura | Associação Obras Sociais Irmã Dulce - Hospital Santo Antônio<br>Centro de Pesquisa Clínica - CPEC<br>Av Bonfim, 161<br>Largo de Roma<br>Salvador, BA 40420-000<br>BRAZIL                  | Comitê de Ética em Pesquisa do Hospital Santo Antônio<br>Associação Obras Sociais Irmã Dulce<br>Av. Bonfim, 161<br>Largo de Roma<br>Salvador, BA 40420-000<br>BRAZIL                                                                               |
| 1234 *        | Dr. Ederlon A. C. Rezende              |                           | Raquel Q. Araujo<br>Dr. Alexandre M. Isola<br>Florença Pereda<br>Dr. João M. Silva Junior<br>Diogo Toledo                                               | Hospital do Servidor Público Estadual<br>Rua Pedro de Toledo, 1800 ç 6º andar - UTI<br>São Paulo, SP 04039-901<br>BRAZIL                                                                  | CEP em Seres Humanos do Instituto de Assistência Médica ao Servidor Público Estadual<br>Rua Pedro de Toledo, 1800<br>3º andar, sala 348<br>São Paulo, SP 04039-004<br>BRAZIL                                                                       |
| 1235 *        | Dr. Maria P. J. S. Lima                |                           | Michelly Baldovinotti<br>Dr. Rita C. C. Coimbra<br>Camila Z. de Deus<br>Dr. Frederico G. Palazzo<br>Dr. Raquel A. Pessagno<br>Dr. Marlirani D. C. Rocha | Hospital e Maternidade Celso Pierro da Pontifícia Universidade Católica de Campinas- PUC- Campinas<br>Av. John Boyd Dunlop, s/n<br>Jardim Ipaussurama<br>Campinas, SP 13059-900<br>BRAZIL | Comite de Ética em pesquisa com seres humanos (CEPSHP) da PUC- Campinas<br>Rua Marechal Deodoro, 1099<br>Sala 224 - Centro<br>Campinas, SP 13010-920<br>BRAZIL                                                                                     |
| 1241 *        | Dr. Carlos Roberto Ribeiro de Carvalho |                           | Dr. Andre Apanavicius<br>Dr. André Luiz Dresler<br>Hovnavian<br>Fabiane Polisel<br>Daiane de Oliveira Santos                                            | Hospital das Clínicas da Faculdade de Medicina da Universidade de São Paulo<br>Av. Dr. Enéas de Carvalho Aguiar, 255<br>6º andar ç UTI Respiratoria<br>São Paulo, SP 05403-000<br>BRAZIL  | Comissão de Ética para Análise de Projetos de Pesquisa CAPPesq<br>Hospital das Clínicas da Faculdade de Medicina da Universidade de São Paulo (HCFMUSP e FMUSP)<br>Rua Ovídio Pires de Campos, 225 - 5º andar<br>São Paulo, SP 05430-010<br>BRAZIL |

\* Did not randomize subjects

**Chile**

**Coordinating Investigators:**

<None Entered>

| <u>Center</u> | <u>Principal Investigator</u> | <u>Co-Investigator(s)</u> | <u>Sub-Investigator(s)</u>                                             | <u>Address(es)</u>                                                                                                        | <u>Institutional Review Board or Ethics Committee Address(es)</u>                                               |
|---------------|-------------------------------|---------------------------|------------------------------------------------------------------------|---------------------------------------------------------------------------------------------------------------------------|-----------------------------------------------------------------------------------------------------------------|
| 1060          | Dr. Patricia Vasquez          |                           | Dr. Carmen Luz Andrade<br>Dra. Marisol Bustos<br>Dr. Pedro Miranda     | Hospital San Juan De Dios<br>Huerfanos 3255<br>Santiago, RM<br>CHILE                                                      | Comite de Etica Cientifica<br>Avda. Libertador Bernardo<br>O'Higgins 2429<br>Santiago,<br>CHILE                 |
| 1061          | Dr. Francisco Arancibia       |                           | Claudia Azocar<br>Javier Cerda<br>Dra. Patricia Fernández<br>Luis Soto | Instituto Nacional del Torax<br>Servicio de Medicina<br>Jose Miguel Infante 717 Piso 3°<br>Providencia, Santiago<br>CHILE | Comite Etico Cientifico<br>Servicio de Salud Metropolitano<br>Oriente<br>Av. Salvador 364<br>Santiago,<br>CHILE |
| 1169          | Dr. Sebastian Ugarte          |                           | Cristian Grenett                                                       | Hospital del Salvador<br>UCI<br>Av. Salvador 364<br>Providencia, Santiago<br>CHILE                                        | Comite Etico Cientifico<br>Servicio de Salud Metropolitano<br>Oriente<br>Av. Salvador 364<br>Santiago,<br>CHILE |

090177e1816ca80c\Approved\Approved On: 06-Oct-2010 15:16

\* Did not randomize subjects



**Colombia****Coordinating Investigators:**

&lt;None Entered&gt;

| <u>Center</u> | <u>Principal Investigator</u>                                 | <u>Co-Investigator(s)</u> | <u>Sub-Investigator(s)</u>                      | <u>Address(es)</u>                                                                                                         | <u>Institutional Review Board or Ethics Committee Address(es)</u>                                                                                                                             |
|---------------|---------------------------------------------------------------|---------------------------|-------------------------------------------------|----------------------------------------------------------------------------------------------------------------------------|-----------------------------------------------------------------------------------------------------------------------------------------------------------------------------------------------|
| 1139          | Dr. Abraham Rafael Ali                                        |                           | Dr. Alvaro Arango                               | Fundacion Cardio Infantil<br>Calle 163A #28-60. 2o Piso<br>Unidad de Cuidado Intensivo<br>Bogota, Cundinamarca<br>COLOMBIA | Comite de Etica en Investigacion<br>Clinica - Fundacion Cardio Infantil<br>Instituto de Cardiologia<br>Fundacion Cardio Infantil<br>Calle 163 A No. 28-60<br>Bogota, Cundinamarca<br>COLOMBIA |
| 1140          | Dr. Eduardo Burgos                                            |                           | Dr. Alirio Bastidas<br>Dr. Carlos Eduardo Perez | Hospital Militar - Unidad de<br>Cuidado Intensivo Medica<br>Transversal 3 #49-00<br>Bogota, Cundinamarca<br>COLOMBIA       | Comite de Etica en Investigacion -<br>Hospital Militar Central<br>Hospital Militar Central<br>Transversal 3 No. 49 -00, piso 13<br>Bogota, Cundinamarca<br>COLOMBIA                           |
| 1141          | Dr. Guillermo Prada<br>Dr. Juan Manuel Gomez<br>(Previous PI) |                           | Dr. Edgar Celis                                 | Fundacion Santa Fe de Bogota<br>Calle 119 No. 9-33<br>Bogota D.C., Cundinamarca 0<br>COLOMBIA                              | Comite Corporativo de Etica en<br>Investigacion Fundacion Santa Fe de<br>Bogota<br>Fundacion Santa Fe de Bogota<br>Calle 116 No.9 - 02<br>Bogota, Cundinamarca<br>COLOMBIA                    |
| 1143          | Dr. Harol Trujillo                                            |                           | Dr. Carlos Alberto Acosta                       | Hospital Federico Lleras<br>Calle 33 #4A-50 Barrio La<br>Francia<br>Ibague, Tolima<br>COLOMBIA                             | Hospital Federico Lleras Acosta<br>Comite de Bioetica e Investigacion<br>Calle 33 #4a-50. Barrio La Francia<br>Ibague,<br>COLOMBIA                                                            |

\* Did not randomize subjects

6-Oct-2010 09:23

| <u>Center</u> | <u>Principal Investigator</u>                                                                       | <u>Co-Investigator(s)</u> | <u>Sub-Investigator(s)</u>                                                                                 | <u>Address(es)</u>                                                                                     | <u>Institutional Review Board or Ethics Committee Address(es)</u>                                                                            |
|---------------|-----------------------------------------------------------------------------------------------------|---------------------------|------------------------------------------------------------------------------------------------------------|--------------------------------------------------------------------------------------------------------|----------------------------------------------------------------------------------------------------------------------------------------------|
| 1206          | Dr. Julio C. Duran<br>Dra. Nelly E. Beltran<br>Hoyos (Previous PI)<br>Rafael S. Cotes (Previous PI) |                           | Dr. Jose Francisco Balaguera<br>Dra. Nelly E. Beltran<br>Hoyos<br>Rafael S. Cotes<br>Dr. Alvaro Villanueva | Clinica de la Costa<br>Carrera 50 No. 80-90.<br>Consultorio 101<br>Barranquilla, Atlantico<br>COLOMBIA | Comite de Etica Clinica de la Costa<br>Comite de Etica<br>Clinica de la Costa<br>Carrera 50 No. 80-90<br>Barranquilla, Atlantico<br>COLOMBIA |

090177e1816ca80c\Approved\Approved On: 06-Oct-2010 15:16

\* Did not randomize subjects

**France****Coordinating Investigators:**

&lt;None Entered&gt;

| <u>Center</u> | <u>Principal Investigator</u> | <u>Co-Investigator(s)</u> | <u>Sub-Investigator(s)</u>                                                                                                                                                                                  | <u>Address(es)</u>                                                                                                                                                            | <u>Institutional Review Board or Ethics Committee Address(es)</u>                                                                        |
|---------------|-------------------------------|---------------------------|-------------------------------------------------------------------------------------------------------------------------------------------------------------------------------------------------------------|-------------------------------------------------------------------------------------------------------------------------------------------------------------------------------|------------------------------------------------------------------------------------------------------------------------------------------|
| 1123          | Prof. Christian Auboyer       |                           | Alain Dumont<br>Arnaud Forgeot<br>Dr. Richard Jospe<br>Dr. Phillipe Mahul<br>Dr. Jerome Morel<br>Dr. David Rosay<br>Stephanie Seve<br>Raphaël Terrana                                                       | Centre Hospitalier Universitaire de Saint Etienne-Hopital Nord<br>Service de Reanimation Polyvalente<br>118, avenue Albert Raimond<br>Saint Etienne Cedex 02, 42055<br>FRANCE | Comite de protection des personnes, Ile-de-France VI<br>Hôpital Pitié Salpêtrière<br>47 Boulevard de l'Hôpital<br>PARIS, 75013<br>FRANCE |
| 1132          | Prof. Michel Wolff            |                           | Dr. Lila Bouadma<br>Dr. Cedric Bruel                                                                                                                                                                        | Groupe hospitalier Bichat-Claude Bernard, Service de Reanimation medicale des maladies infectieuses<br>46, rue Henri Huchard<br>Paris, Cedex 18 75877<br>FRANCE               | Comite de protection des personnes, Ile-de-France VI<br>Hôpital Pitié Salpêtrière<br>47 Boulevard de l'Hôpital<br>PARIS, 75013<br>FRANCE |
| 1133          | Pr. Jean Chastre              |                           | Dr. Francois Bouvet<br>Dr. Alain Combes<br>Dr. Claude Gibert<br>Dr. Charles-Edouard Luyt<br>Dr. Mariana Mirabel<br>Dr. Ania Nieszkowska<br>Catherine Reynaud<br>Marc Tonnellier<br>Dr. Jean-louis Trouillet | Groupe Hospitalier Pitie-Salpatriere<br>Service de Reanimation Medicale-Institut de Cardiologie<br>47-83 boulevard de l'Hopital<br>Paris, 75013<br>FRANCE                     | Comite de protection des personnes, Ile-de-France VI<br>Hôpital Pitié Salpêtrière<br>47 Boulevard de l'Hôpital<br>PARIS, 75013<br>FRANCE |

090177e1816ca80c\Approved\Approved On: 06-Oct-2010 15:16

| <u>Center</u> | <u>Principal Investigator</u> | <u>Co-Investigator(s)</u> | <u>Sub-Investigator(s)</u>                                                                                                                                                                               | <u>Address(es)</u>                                                                                                                                                                   | <u>Institutional Review Board or Ethics Committee Address(es)</u>                                                                           |
|---------------|-------------------------------|---------------------------|----------------------------------------------------------------------------------------------------------------------------------------------------------------------------------------------------------|--------------------------------------------------------------------------------------------------------------------------------------------------------------------------------------|---------------------------------------------------------------------------------------------------------------------------------------------|
| 1188          | Prof. Claude Denis<br>Martin  |                           | Dr. Jacques Albanese<br>Dr. Francois Antonini<br>Dr. Valery Blasco<br>Dr. Aude Charvet<br>Frederic Garcin<br>Dr. Marc Leone<br>Dr. Pierre Visintini<br>Dr. Sandrine Wiramus<br>Dr. Laurent Zieleskiewicz | Centre Hospitalier Universitaire<br>de Marseille, Hôpital Nord,<br>Département d'Anesthésie -<br>Réanimation<br>Chemin des Bourrely<br>Marseille Cedex 20, France<br>13915<br>FRANCE | Comite de protection des personnes,<br>Ile-de-France VI<br>Hôpital Pitié Salpêtrière<br>47 Boulevard de l'Hôpital<br>PARIS, 75013<br>FRANCE |

090177e1816ca80c\Approved\Approved On: 06-Oct-2010 15:16

\* Did not randomize subjects

**Germany****Coordinating Investigators:**

&lt;None Entered&gt;

| <u>Center</u> | <u>Principal Investigator</u>  | <u>Co-Investigator(s)</u> | <u>Sub-Investigator(s)</u>                                                                                        | <u>Address(es)</u>                                                                                                                                  | <u>Institutional Review Board or Ethics Committee Address(es)</u>                                                                                                             |
|---------------|--------------------------------|---------------------------|-------------------------------------------------------------------------------------------------------------------|-----------------------------------------------------------------------------------------------------------------------------------------------------|-------------------------------------------------------------------------------------------------------------------------------------------------------------------------------|
| 1124          | Prof. Dr. Michael Quintel      |                           | Dr. Thorsten Perl                                                                                                 | Universitaetsklinik Goettingen<br>Abteilung Anaesthesiologie II-<br>Operative Intensivmedizin<br>Robert-Koch-Str 40<br>Goettingen, 37075<br>GERMANY | Ethik-Kommission an der<br>Medizinischen Fakultaeet der<br>Universitaet Leipzig<br>Institut fuer Klinische Pharmakologie<br>Haertelstrasse 16-18<br>Leipzig, 04107<br>GERMANY |
| 1125          | Dr. med. Dierk V.<br>Schmitt   |                           | Dr. Med. Evaldas<br>Girdauskas<br>Dr.med. Ardwan Rastan<br>Dr.med. Matthias Sauer<br>Dr. Med. Thomas<br>Schroeter | Herzzentrum Leipzig<br>Struempellstr. 39<br>Leipzig, 04289<br>GERMANY                                                                               | Ethik-Kommission an der<br>Medizinischen Fakultaeet der<br>Universitaet Leipzig<br>Institut fuer Klinische Pharmakologie<br>Haertelstrasse 16-18<br>Leipzig, 04107<br>GERMANY |
| 1128          | Prof. Dr. med. Bernhard<br>Ruf |                           | Dr. Joerg Hofmann<br>Dr. Dany Plassmann<br>Dr. Till Treutler                                                      | Klinikum St. Georg<br>2. Innere Klinik, Zentrum fuer<br>Infektiologie und Reisemedizin<br>Delitzscher Str. 141<br>Leipzig, 04129<br>GERMANY         | Ethik-Kommission an der<br>Medizinischen Fakultaeet der<br>Universitaet Leipzig<br>Institut fuer Klinische Pharmakologie<br>Haertelstrasse 16-18<br>Leipzig, 04107<br>GERMANY |

## Greece

## Coordinating Investigators:

&lt;None Entered&gt;

| <u>Center</u> | <u>Principal Investigator</u> | <u>Co-Investigator(s)</u> | <u>Sub-Investigator(s)</u>                                                                                | <u>Address(es)</u>                                                                           | <u>Institutional Review Board or Ethics Committee Address(es)</u>                    |
|---------------|-------------------------------|---------------------------|-----------------------------------------------------------------------------------------------------------|----------------------------------------------------------------------------------------------|--------------------------------------------------------------------------------------|
| 1100          | John Kioumis                  |                           | Dr. Nikolaos Manolakoglou<br>Dr. Georgia Pitsiou                                                          | 'G. Papanikolaou' District General Hospital of Thessaloniki Exohi Thessaloniki, 57010 GREECE | Georgios Papanikolaou Hospital of Thessaloniki EXOHI THESSALONIKI, 57010 GREECE      |
| 1186          | Prof. Dimitris Georgopoulos   |                           | Christina Alexopoulou<br>Sevasti Koumiotaki<br>Maria Plataki<br>Katerina Vaporidi<br>Georgios Xirouchakis | University General Hospital of Heraklion Voutes Heraklion Crete, Greece 71110 GREECE         | PEPAGNI Hospital Heraklion Crete Voutes & Stavrakion str CRETE, 71110 GREECE         |
| 1187          | Prof. George Baltopoulos      |                           | Eleni Boutzouka<br>Dr. Penelope Evagelopoulou<br>Georgios Fildissis<br>Dr. Pavlos Myrianthefs             | General Hospital of Attica_KAT 2, Nikis Street Kifisia, Athens 14561 GREECE                  | "KAT" General Hospital of Athens 2 Nikis str. ATHENS, 14561 GREECE                   |
| 1191          | Prof. Charalabos Roussos      |                           | Dr. Spyros Koliass<br>Vassiliki Markaki<br>Dr. Christina Routsis<br>Grigorios Stratakos                   | General Hospital of Athens Evangelismos 45-47 Ipsilantou Athens, 10676 GREECE                | "Evangelismos" General Hospital of Athens 45-47 Ipsilantou str. ATHENS, 10676 GREECE |

\* Did not randomize subjects

6-Oct-2010 09:23

**Hong Kong****Coordinating Investigators:**

Dr. Lee Sung Lau  
Dr. Yat Yee Natalie Leung

| <u>Center</u> | <u>Principal Investigator</u> | <u>Co-Investigator(s)</u> | <u>Sub-Investigator(s)</u>                      | <u>Address(es)</u>                                                                                                                                     | <u>Institutional Review Board or Ethics Committee Address(es)</u>                                                                                                                                                                                                                                                             |
|---------------|-------------------------------|---------------------------|-------------------------------------------------|--------------------------------------------------------------------------------------------------------------------------------------------------------|-------------------------------------------------------------------------------------------------------------------------------------------------------------------------------------------------------------------------------------------------------------------------------------------------------------------------------|
| 1091          | Dr. Wai Ming Chan             |                           | Dr. Matthew Wong<br>Dr. Karl Kang Young         | The University of Hong Kong,<br>Queen Mary Hospital<br>Department of Anaesthesia and<br>Intensive Care<br>102 Pokfulam Road<br>Hong Kong,<br>HONG KONG | Institutional Review Board of the<br>University of Hong Kong/Hospital<br>Authority Hong Kong West Cluster<br>Institutional Review Board of the<br>University of Hong Kong/Hospital<br>Authority Hong Kong West Cluster<br>Rm 901, Administration Block<br>Queen Mary Hospital<br>102 Pokfulam Road<br>Hong Kong,<br>HONG KONG |
| 1095 *        | Dr. Charles Gomersall         |                           | Prof. Gavin Joynt<br>Dr. Qi Tian<br>Dr. Li Weng | Prince of Wales Hospital<br>30-32 Ngan Shing Street<br>Shatin, New Territories<br>HONG KONG                                                            | Joint The Chinese University of<br>H.K.-New Territories East Cluster<br>Clinical Research Ethics Committee<br>Flat 3C, Block B, Staff Quarters<br>Prince of Wales Hospital<br>Shatin,<br>HONG KONG                                                                                                                            |

090177e1816ca80c\Approved\Approved On: 06-Oct-2010 15:16

\* Did not randomize subjects

## Italy

## Coordinating Investigators:

&lt;None Entered&gt;

| <u>Center</u> | <u>Principal Investigator</u>                             | <u>Co-Investigator(s)</u> | <u>Sub-Investigator(s)</u>                                                                                               | <u>Address(es)</u>                                                                                          | <u>Institutional Review Board or Ethics Committee Address(es)</u>                                      |
|---------------|-----------------------------------------------------------|---------------------------|--------------------------------------------------------------------------------------------------------------------------|-------------------------------------------------------------------------------------------------------------|--------------------------------------------------------------------------------------------------------|
| 1150 *        | Dr. Giovanni Paolo Ligia                                  |                           | Elisabetta Sortino                                                                                                       | U.O. IV Pneumologia<br>PO "R. Binaghi"<br>USL8 Sardegna<br>Via Is Guadazzonis, Cagliari 2<br>09126<br>ITALY | Comitato Etico Indipendente<br>Azienda USL 8- Cagliari<br>Via Logudoro, 17<br>Cagliari, 09127<br>ITALY |
| 1152 *        | Dr. Alberto Casazza<br>Dr. Martin Langer<br>(Previous PI) |                           | Dr. Andrea Bottazzi<br>Dr. Federico Capra<br>Marzani<br>Dr. Vincenzo Emmi<br>Dr. Paolo Fumagalli<br>Dr. Alessandro Lilla | Anestesia e Rianimazione I e II<br>Policlinico San Matteo IRCCS<br>Via Golgi, 19<br>Pavia, 27100<br>ITALY   | Comitato di Bioetica I.R.C.C.S.<br>Policlinico S.Matteo<br>V.le Golgi,19<br>pavia, 27100<br>ITALY      |



**Korea, Republic Of**

**Coordinating Investigators:**

<None Entered>

| <u>Center</u> | <u>Principal Investigator</u> | <u>Co-Investigator(s)</u> | <u>Sub-Investigator(s)</u>                                                                                                                                                                                                               | <u>Address(es)</u>                                                                                                                                                     | <u>Institutional Review Board or Ethics Committee Address(es)</u>                                                                                                                                                       |
|---------------|-------------------------------|---------------------------|------------------------------------------------------------------------------------------------------------------------------------------------------------------------------------------------------------------------------------------|------------------------------------------------------------------------------------------------------------------------------------------------------------------------|-------------------------------------------------------------------------------------------------------------------------------------------------------------------------------------------------------------------------|
| 1193          | Yang Soo Kim                  |                           | Seong-Ho Choi<br>Jae Phil Choi<br>Sang-Ho Choi<br>Yong Pill Chong<br>Eun Young Jang<br>Min Hyok Jeon<br>Jung Im Kim<br>Dr. Mi-Na Kim<br>Min Kyung Kim<br>Seong Cheol Kim<br>Tae Kyung Kwon<br>Sang-Oh Lee<br>Ki-Ho Park<br>Kyung Ah Song | Asan Medical Center, Division of Infectious Disease<br>388-1, Pungnap-dong, Songpa-gu<br>Seoul, 138-736<br>KOREA, REPUBLIC OF                                          | IRB of Asan Medical Center<br>Asan Medical Center IRB<br>388-1 Pungnap-dong, Songpa-gu<br>Seoul, 138-736<br>KOREA, REPUBLIC OF                                                                                          |
| 1194          | Joong-Sik Eom                 |                           | Kyoung Woo Dong<br>Bo-Young Hwang<br>Yang Hwa Kim<br>Sun-young Kwon<br>Ms. Young-Jin Lee<br>Jin Seo Lee<br>Eun Kyung Mo<br>Yong-Bum Park<br>So-Yeon Park<br>Sul-Hee Sim                                                                  | Kangdong Sacred Heart Hospital, Hallym University Medical Center, Division of Infectious Diseases<br>445 Gil-Dong, Kangdong-Gu<br>Seoul, 134-701<br>KOREA, REPUBLIC OF | IRB of Kangdong Sacred Heart Hospital, Hallym University Medical Center<br>IRB of Kangdong Sacred Heart Hospital, Hallym University Medical Center<br>445 Gil-dong, Kangdong-gu<br>Seoul, 134-701<br>KOREA, REPUBLIC OF |

090177e1816ca80c\Approved\Approved On: 06-Oct-2010 15:16

\* Did not randomize subjects

| <u>Center</u> | <u>Principal Investigator</u>                              | <u>Co-Investigator(s)</u> | <u>Sub-Investigator(s)</u>                                                                                                                                                                                                       | <u>Address(es)</u>                                                                                                                                                          | <u>Institutional Review Board or Ethics Committee Address(es)</u>                                                                                                      |
|---------------|------------------------------------------------------------|---------------------------|----------------------------------------------------------------------------------------------------------------------------------------------------------------------------------------------------------------------------------|-----------------------------------------------------------------------------------------------------------------------------------------------------------------------------|------------------------------------------------------------------------------------------------------------------------------------------------------------------------|
| 1195          | Prof. Min Ja Kim                                           |                           | Sun Hwa Chung<br>Dr. Sung-Bum Kim<br>Dr. Jeong-Yeon Kim<br>JU HEUI KIM<br>Sung hee Park<br>Dr. Yoonseon Park<br>Yeon Doo Ryu<br>Dr. Jang-Wook Sohn<br>Dr. Young Kyung Yoon                                                       | Korea University Anam Hospital,<br>Division of Infectious Diseases<br>126-1, 5th, Anam-Dong,<br>Seongbuk-Gu<br>Seoul, 136-705<br>KOREA, REPUBLIC OF                         | IRB of Korea University Anam<br>Hospital<br>IRB of Korea University Anam<br>Hospital<br>126-1, 5th, Anam-Dong, Seongbuk-<br>Gu<br>Seoul, 136-705<br>KOREA, REPUBLIC OF |
| 1222          | Prof. Kyong Ran Peck                                       |                           | Dr. HaeSuk Cheong<br>Kwon Gyeong Won<br>Young Eun Ha<br>Dr. Mi-Kyong Joung<br>Shin Han Jung<br>Dr. EunSeok Kim<br>Gyeong Won Kwon<br>Prof. Nam Yong Lee<br>Kang Mingyoung<br>Hye Won Moon<br>Kyung Mok Sohn<br>Dr. Gee Young Suh | Samsung Medical Center,<br>Division of Infectious Diseases<br>50 Ilwon-dong Kangnam-gu<br>Seoul, 135-710<br>KOREA, REPUBLIC OF                                              | Samsung Medical Center IRB<br>Samsung Medical Center<br>50 Ilwon-dong, Kangnam-Gu<br>Seoul, 135-710<br>KOREA, REPUBLIC OF                                              |
| 1223          | Prof. Dong-Gun Lee<br>Prof. Wan-shik Shin<br>(Previous PI) |                           | Prof. Su-mi Choi<br>Hye-Rim Jung<br>Dr. Sae Yoon Kee<br>Dr. Si-Hyun Kim<br>Hyun-Ji Kim<br>Hyun-Jin Kim<br>Yo A Lee                                                                                                               | Division of Infectious Disease,<br>The Catholic University of<br>Korea, St. Mary's Hospital<br>62, Yeouido-dong,<br>Yeongdeungpo-gu<br>Seoul, 150-713<br>KOREA, REPUBLIC OF | St. Mary's hospital IRB<br>St. Mary's hospital IRB<br>62, Yeouido-dong , Yeongdeungpo-gu<br>Seoul, 150-713<br>KOREA, REPUBLIC OF                                       |

090177e1816ca80c\Approved\Approved On: 06-Oct-2010 15:16

\* Did not randomize subjects

**Malaysia****Coordinating Investigators:**

&lt;None Entered&gt;

| <u>Center</u> | <u>Principal Investigator</u> | <u>Co-Investigator(s)</u> | <u>Sub-Investigator(s)</u>                                                                                                                                                                                                                    | <u>Address(es)</u>                                                                   | <u>Institutional Review Board or Ethics Committee Address(es)</u>                                                                                                                  |
|---------------|-------------------------------|---------------------------|-----------------------------------------------------------------------------------------------------------------------------------------------------------------------------------------------------------------------------------------------|--------------------------------------------------------------------------------------|------------------------------------------------------------------------------------------------------------------------------------------------------------------------------------|
| 1092          | Prof. Adeeba Kamarulzaman     |                           | Dr. Norliza Ariffin<br>Dr Ai-Vyrn Chin<br>Dr. Shahrul Bahyah Kamaruzzaman<br>Dr. Kwee-choy James Koh<br>Dr. Soraya Kunanayagam<br>Assoc. Prof. Dr. Yong Kek Pang<br>Dr. Sasheela Sri La Sri Ponnampalavanar<br>Dr. Sharifah Faridah Syed Omar | University Malaya Medical Centre<br>Lembah Pantai<br>Kuala Lumpur, 59100<br>MALAYSIA | Medical Ethics Committee<br>University Malaya Medical Centre<br>Lembah Pantai<br>Kuala Lumpur, 59100<br>MALAYSIA                                                                   |
| 1101          | Dr. Li Ling Tai               |                           | Dr. Siew Hian Ng<br>Dr. Shanti Rudra Deva                                                                                                                                                                                                     | Hospital Kuala Lumpur<br>Jalan Pahang<br>Kuala Lumpur, 50586<br>MALAYSIA             | Medical Research & Ethics Committee<br>Ministry of Health, c/o NIH Secretariat, Institute for Health Management<br>Jalan Rumah Sakit<br>Bangsar<br>Kuala Lumpur, 59000<br>MALAYSIA |

090177e1816ca80c\Approved\Approved On: 06-Oct-2010 15:16

**Mexico****Coordinating Investigators:**

Magaly Flores-Ortiz (Previous Coordinating Investigator)

| <b><u>Center</u></b> | <b><u>Principal Investigator</u></b> | <b><u>Co-Investigator(s)</u></b> | <b><u>Sub-Investigator(s)</u></b>                                                                                                                                                                                                       | <b><u>Address(es)</u></b>                                                                                                                                                                                                                                                 | <b><u>Institutional Review Board or Ethics Committee Address(es)</u></b>                                                                                                         |
|----------------------|--------------------------------------|----------------------------------|-----------------------------------------------------------------------------------------------------------------------------------------------------------------------------------------------------------------------------------------|---------------------------------------------------------------------------------------------------------------------------------------------------------------------------------------------------------------------------------------------------------------------------|----------------------------------------------------------------------------------------------------------------------------------------------------------------------------------|
| 1080                 | Dr. Eduardo Rodriguez-Noriega        |                                  | Dr. Sayra Camarena<br>Dr. Pedro Gomez Quiroz<br>Dr. Rayo Morfín-Otero<br>Dr. Marisela Vazquez<br>Leon                                                                                                                                   | Hospital Civil De Guadalajara<br>Calle Hospital 308, Col. Centro<br>Guadalajara, Jalisco 44280<br>MEXICO                                                                                                                                                                  | Comite de Enseñanza, Investigacion y Etica<br>Calle Hospital 278<br>Sector Hidalgo<br>Guadalajara, Jalisco 44280<br>MEXICO                                                       |
| 1081                 | Dr. Cesar Cruz-Lozano                |                                  | Dr. Fernando Corona-Fernandez<br>Jorge Rosendo Sanchez-Medina                                                                                                                                                                           | Hospital Regional de Petróleos Mexicanos<br>Calle 10 y 5a. Avenida<br>Col. Jardin 20 de Noviembre<br>Ciudad Madero, Tamaulipas 89440<br>MEXICO                                                                                                                            | Hospital Regional de Petroleos Mexicano<br>Comité de Investigación y Bioetica<br>Calle 10 y 5a. Avenida Col. Jardin 20 de Noviembre<br>Ciudad Madero, Tamaulipas 89440<br>MEXICO |
| 1082                 | Dr. Luis Adrian Rendon-Perez         |                                  | Dr. Hilda Alfaro-Riveros<br>Dr. Janeth A. Almaguer<br>Dr. Sandra-Leticia Cervantes-de-Hoyos<br>Paulina Cruz-Bravo<br>Dr. Abril Deschamps-Blanco<br>Mariana Rodriguez-Leal<br>Farah Katia Sevilla<br>Leticia Alejandrina<br>Zavala-Gomez | Hospital Universitario Dr. José E. Gonzalez Edificio Rodrigo Barragan 3o Piso<br>C.I.P.T.I.R. Centro de investigación Prevención y Tratamiento de Infecciones Respiratorias<br>Av. Madero y Gonzalitos S/N<br>Monterrey/Col. Mitras Centro,<br>Nuevo León 64460<br>MEXICO | Comité de Investigación y Ética<br>Hospital Universitario Dr. José E. Gonzalez<br>Madero y Gonzalitos s/n<br>Col. Mitras Centro<br>Monterrey, Nuevo León 64460<br>MEXICO         |

090177e1816ca80c\Approved\Approved On: 06-Oct-2010 15:16

| <u>Center</u> | <u>Principal Investigator</u>     | <u>Co-Investigator(s)</u> | <u>Sub-Investigator(s)</u>                                  | <u>Address(es)</u>                                                                                                                                                                               | <u>Institutional Review Board or Ethics Committee Address(es)</u>                                                                                                                                                 |
|---------------|-----------------------------------|---------------------------|-------------------------------------------------------------|--------------------------------------------------------------------------------------------------------------------------------------------------------------------------------------------------|-------------------------------------------------------------------------------------------------------------------------------------------------------------------------------------------------------------------|
| 1155          | Dr. Guillermo M. Ruiz<br>Palacios |                           | Dr. Pablo Belaunzaran-Zamudio<br>Dr. Claudia Mendez-Mercado | Instituto Nacional de Ciencias Medicas y Nutrición "Salvador Zubiran".Departamento de Infectologia<br>Vasco de Quiroga #15<br>Col. Seccion XVI. Delegacion Tlalpan<br>Mexico, DF 14000<br>MEXICO | Instituto Nacional de Ciencias Medicas y Nutricion Salvador Zubiran<br>Comite Institucional de Investigacion Biomedica en Humanos<br>VASCO DE QUIROGA 15<br>COL SECCION XVI TLALPAN<br>Mexico, DF 14000<br>MEXICO |

090177e1816ca80c\Approved\Approved On: 06-Oct-2010 15:16

\* Did not randomize subjects

**Poland****Coordinating Investigators:**

&lt;None Entered&gt;

| <u>Center</u> | <u>Principal Investigator</u>        | <u>Co-Investigator(s)</u> | <u>Sub-Investigator(s)</u>                                                                          | <u>Address(es)</u>                                                                                                                                                                                       | <u>Institutional Review Board or Ethics Committee Address(es)</u>                                                    |
|---------------|--------------------------------------|---------------------------|-----------------------------------------------------------------------------------------------------|----------------------------------------------------------------------------------------------------------------------------------------------------------------------------------------------------------|----------------------------------------------------------------------------------------------------------------------|
| 1212          | Prof. Barbara Zubelewicz-Szkodzinska |                           | Dr. Aleksander Danikiewicz<br>Dr. Lukasz Labus<br>Dr. Anna Pietka-Rzycka<br>Dr. Wojciech Romanowski | Szpital Specjalistyczny nr 1<br>Katedra i Klinika Chorob Wewnętrznych w Bytomiu<br>ul. Zeromskiego 7<br>Bytom, 41-902<br>POLAND                                                                          | Komisja Bioetyczna Slaskiego Uniwersytetu Medycznego w Katowicach<br>Poniatowskiego 15<br>Katowice, 40-055<br>POLAND |
| 1213          | Prof. Wladyslaw Pierzchala           |                           | Dr. Grzegorz Gasior<br>Dr. Mariola Ograbek-Krol<br>Dr. Anna Oslawska-Dzierzega                      | Samodzielny Publiczny Centralny Szpital Kliniczny im. Prof. Kornela Gibinskiego Slaskiego Uniwersytetu Medycznego w Katowicach,<br>Klinika Pneumonologii<br>ul. Medykow 14<br>Katowice, 40-752<br>POLAND | Komisja Bioetyczna Slaskiego Uniwersytetu Medycznego w Katowicach<br>Poniatowskiego 15<br>Katowice, 40-055<br>POLAND |

| <u>Center</u> | <u>Principal Investigator</u> | <u>Co-Investigator(s)</u> | <u>Sub-Investigator(s)</u>                                                                                                         | <u>Address(es)</u>                                                                                                                                                                                                                                                                                                                                                                                           | <u>Institutional Review Board or Ethics Committee Address(es)</u>                                                    |
|---------------|-------------------------------|---------------------------|------------------------------------------------------------------------------------------------------------------------------------|--------------------------------------------------------------------------------------------------------------------------------------------------------------------------------------------------------------------------------------------------------------------------------------------------------------------------------------------------------------------------------------------------------------|----------------------------------------------------------------------------------------------------------------------|
| 1226          | Prof. Andrzej Szczeklik       |                           | Dr. Stanislaw Bazan - Socha<br>Dr. Aleksandra Bukiej<br>Dr. Joanna Marciniak-Sroka<br>Dr. Lucyna Mastalerz<br>Dr. Wojciech Wegrzyn | SPZOZ Szpital Uniwersytecki w Krakowie<br>Oddzial Kliniczny Kliniki Alergii i Immunologii<br>ul. Skawinska 8<br>Krakow, 31 - 066<br>POLAND<br><br>SPZOZ Szpital Uniwersytecki w Krakowie<br>Oddzial Autoimmunologii i Zaburzen Hemostazy<br>ul. Skawinska 8<br>Krakow, 31-066<br>POLAND<br><br>SPZOZ Szpital Uniwersytecki w Krakowie<br>Oddzial Pulmonologii<br>ul. Skawinska 8<br>Krakow, 31-066<br>POLAND | Komisja Bioetyczna Slaskiego Uniwersytetu Medycznego w Katowicach<br>Poniatowskiego 15<br>Katowice, 40-055<br>POLAND |

**Portugal****Coordinating Investigators:**

&lt;None Entered&gt;

| <u>Center</u> | <u>Principal Investigator</u> | <u>Co-Investigator(s)</u> | <u>Sub-Investigator(s)</u>                                                                           | <u>Address(es)</u>                                                                                                                | <u>Institutional Review Board or Ethics Committee Address(es)</u>                                                                                                                                                                                                                                                     |
|---------------|-------------------------------|---------------------------|------------------------------------------------------------------------------------------------------|-----------------------------------------------------------------------------------------------------------------------------------|-----------------------------------------------------------------------------------------------------------------------------------------------------------------------------------------------------------------------------------------------------------------------------------------------------------------------|
| 1121          | Dra. Paula Coutinho           |                           | Dra. Regina Coelho                                                                                   | Centro Hospitalar de Coimbra/Unidade de Cuidados Intensivos<br>Quinta dos Vales-S. Martinho do Bispo<br>Coimbra, 3041<br>PORTUGAL | CEIC - Comissão de Ética para a Investigação Clínica<br>Parque da Saúde de Lisboa - Av <sup>a</sup> do Brasil, 53- Pavilhão 17-A<br>Lisboa, 1749-004<br>PORTUGAL<br><br>Comissão de Ética do Centro Hospitalar de Coimbra<br>Centro Hospitalar de Coimbra<br>S. Martinho do Bispo<br>Coimbra, 3040<br>PORTUGAL        |
| 1122          | Dr. Eduardo Jorge Almeida     |                           | Dr. Amanda Alves<br>Dr. Antero do Vale Fernandes<br>Dra. Sara Beatriz Lança<br>Dra. Lucinda Oliveira | Unidade de Cuidados Intensivos Hospital Garcia de Orta<br>Bairro do Matadouro Pragal<br>Almada, 2800<br>PORTUGAL                  | CEIC - Comissão de Ética para a Investigação Clínica<br>Parque da Saúde de Lisboa - Av <sup>a</sup> do Brasil, 53- Pavilhão 17-A<br>Lisboa, 1749-004<br>PORTUGAL<br><br>Comissão de Ética - Hospital Garcia de Orta<br>Comissão de Ética - Hospital Garcia de Orta<br>Bairro do Matadouro<br>Almada, 2825<br>PORTUGAL |

090177e1816ca80c\Approved\Approved On: 06-Oct-2010 15:16

\* Did not randomize subjects

6-Oct-2010 09:23



| <u>Center</u> | <u>Principal Investigator</u>                                | <u>Co-Investigator(s)</u> | <u>Sub-Investigator(s)</u> | <u>Address(es)</u>                                                                                                                                            | <u>Institutional Review Board or Ethics Committee Address(es)</u>                                                                                                                                                                                                                                                                                 |
|---------------|--------------------------------------------------------------|---------------------------|----------------------------|---------------------------------------------------------------------------------------------------------------------------------------------------------------|---------------------------------------------------------------------------------------------------------------------------------------------------------------------------------------------------------------------------------------------------------------------------------------------------------------------------------------------------|
| 1130          | Dra. Anabela Mesquita                                        |                           | Dr. Pedro Grade            | Unidade de Saude Local de Matosinhos/Hospital Pedro Hispano-Unidade de Cuidados Intensivos<br>Rua Dr. Eduardo Torres<br>Senhora da Hora, 4464-513<br>PORTUGAL | CEIC - Comissão de Ética para a Investigação Clínica<br>Parque da Saúde de Lisboa - Av <sup>a</sup> do Brasil, 53- Pavilhão 17-A<br>Lisboa, 1749-004<br>PORTUGAL<br><br>Comissão de Ética da Unidade Local de Saúde de Matosinhos SA<br>Unidade Local de Saúde de Matosinhos SA<br>Matosinhos,<br>PORTUGAL                                        |
| 1173          | Dr. Pedro Ferreira<br>(Previous PI)<br>Dra Camila Tapadinhas |                           |                            | Hospital S. Francisco Xavier-<br>Servico Medicina- Unidade de Cuidados Intensivos<br>Estrada do Forte do Alto do Duque<br>Lisboa, 1449-005<br>PORTUGAL        | CEIC - Comissão de Ética para a Investigação Clínica<br>Parque da Saúde de Lisboa - Av <sup>a</sup> do Brasil, 53- Pavilhão 17-A<br>Lisboa, 1749-004<br>PORTUGAL<br><br>Comissão de Ética - Hospital S. Francisco Xavier<br>Comissão de Ética - Hospital S. Francisco Xavier<br>Estrada do Forte do Alto do Duque<br>Lisboa, 1449-005<br>PORTUGAL |

090177e1816ca80c\Approved\Approved On: 06-Oct-2010 15:16

\* Did not randomize subjects

**Russian Federation****Coordinating Investigators:**

&lt;None Entered&gt;

| <u>Center</u> | <u>Principal Investigator</u> | <u>Co-Investigator(s)</u> | <u>Sub-Investigator(s)</u>                                                                          | <u>Address(es)</u>                                                                                                                                                                                                                          | <u>Institutional Review Board or Ethics Committee Address(es)</u>                                                                                                                                                                                                                                                                                                                              |
|---------------|-------------------------------|---------------------------|-----------------------------------------------------------------------------------------------------|---------------------------------------------------------------------------------------------------------------------------------------------------------------------------------------------------------------------------------------------|------------------------------------------------------------------------------------------------------------------------------------------------------------------------------------------------------------------------------------------------------------------------------------------------------------------------------------------------------------------------------------------------|
| 1105          | Prof. Boris R. Gelfand        |                           | Dr. Elizaveta B. Gelfand<br>Dr. Alexander N. Martynov                                               | Dept. of Surgery, Anesthesiology and Intensive Care<br>8, Leninsky Prospect<br>Moscow, RUSSIA 117049<br>RUSSIAN FEDERATION                                                                                                                  | Ethicheskii Comitet<br>Gosudarstvennogo Obrazovatel'nogo Uchrezhdeniya RGMU<br>1. UL. Ostrovitlanova<br>Moskva, 117997<br>RUSSIAN FEDERATION<br><br>Ethicheskii Comitet Pri Federalnom Organe Kontrolya Kachestva Lekarstvennikh Sredstv<br><br>Petrovskii Boulvar 8, Build. 3<br>Moskva, 127051<br>RUSSIAN FEDERATION                                                                         |
| 1106          | Prof. Sergey V. Yakovlev      |                           | Dr. Irina N. Bouseva<br>Dr. Yuriy Y. Romanovskiy<br>Dr. Oleg M. Romashov<br>Dr. Tatiana V. Shakhova | Gosudarstvennoe Uchrezhdenie Zdravookhraneniya goroda Moskvyy Gorodskaya Klinicheskaya Bolnitsa #7 Komiteta Zdravookhraneniya Moskvyy Otdelenie reanimacii i intensivnoy terapii 4, Kolomenskiy Proezd Moscow, 115446<br>RUSSIAN FEDERATION | Ethicheskii Comitet pri Gosudarstvennom Uchrezhdenii Zdravookhraneniya goroda Moskvyy Gorodskaya Klinicheskaya Bolnitsa #7 Komiteta Zdravookhraneniya Moskvyy 4, Kolomenskiy Proezd Moscow, 115446<br>RUSSIAN FEDERATION<br><br>Ethics Committee at the Federal Service on Surveillance in Healthcare and Social Development 8, str. 2, Petrovskij bulvar Moscow, 127051<br>RUSSIAN FEDERATION |

090177e1816ca80c\Approved\Approved On: 06-Oct-2010 15:16

\* Did not randomize subjects

6-Oct-2010 09:23

| <u>Center</u> | <u>Principal Investigator</u> | <u>Co-Investigator(s)</u> | <u>Sub-Investigator(s)</u>                                          | <u>Address(es)</u>                                                                                                                                                                                                                                                           | <u>Institutional Review Board or Ethics Committee Address(es)</u>                                                                                                                                                                                                                                                                                                                                                                                        |
|---------------|-------------------------------|---------------------------|---------------------------------------------------------------------|------------------------------------------------------------------------------------------------------------------------------------------------------------------------------------------------------------------------------------------------------------------------------|----------------------------------------------------------------------------------------------------------------------------------------------------------------------------------------------------------------------------------------------------------------------------------------------------------------------------------------------------------------------------------------------------------------------------------------------------------|
| 1117          | Dr. Irina E. Gridchik         |                           | Dr. Galina G. Borisova<br>Dr. Alla V. Khlyustina<br>Dr. Anna A. Rog | Gosudarstvennoe Uchrezhdenie<br>Zdravookhraneniya goroda<br>Moskvy Gorodskaya<br>Klinicheskaya Bolnitsa #15<br>im. O. M. Filatova Komiteta<br>Zdravookhraneniya g. Moskvy<br>Otdelenie Intensivnoy Terapii<br>23 Veshnyakovskaya ul.<br>Moscow, 111539<br>RUSSIAN FEDERATION | Ethicheskiy Comitet Pri<br>Gosudarstvennoe Uchrezhdenie<br>Zdravookhraneniya<br>goroda Moskvy Gorodskaya<br>Klinicheskaya Bolnitsa # 15 im.<br>O.M. Filatova Komiteta<br>Zdravookhraneniya g. Moskvy<br>23 Veshnyakovskaya ul.<br>Moscow, 111539<br>RUSSIAN FEDERATION<br><br>Ethics Committee at the Federal<br>Service on Surveillance in Healthcare<br>and Social Development<br>8, str. 2, Petrovskij bulvar<br>Moscow, 127051<br>RUSSIAN FEDERATION |

090177e1816ca80c\Approved\Approved On: 06-Oct-2010 15:16

| <u>Center</u> | <u>Principal Investigator</u>  | <u>Co-Investigator(s)</u> | <u>Sub-Investigator(s)</u>                                                                    | <u>Address(es)</u>                                                                                                                                                                                                                                                                                                                                                                                                                                                                                                                                                   | <u>Institutional Review Board or Ethics Committee Address(es)</u>                                                                                                                                                                                                                             |
|---------------|--------------------------------|---------------------------|-----------------------------------------------------------------------------------------------|----------------------------------------------------------------------------------------------------------------------------------------------------------------------------------------------------------------------------------------------------------------------------------------------------------------------------------------------------------------------------------------------------------------------------------------------------------------------------------------------------------------------------------------------------------------------|-----------------------------------------------------------------------------------------------------------------------------------------------------------------------------------------------------------------------------------------------------------------------------------------------|
| 1118          | Prof. Grigory P. Aroutyunov    |                           | Dr. Liana T. Alikhanova<br>Dr. Natalia V. Rylova<br>Dr. Anna Rylova<br>Dr. Eugeni Y. Smoltsov | City Hospital #4, Department of Therapy of Moscow Faculty of Russian State Medical University Pavlovskaya str., 25, building 13 Moscow, 113093 RUSSIAN FEDERATION<br><br>Kafedra Terapii Moskovskogo Fakulteta Gosudarstvennogo Obrazovatel'nogo Uchrezhdeniya Vysshogo Professional'nogo Obrazovaniya Rossiyskogo Gosudarstvennogo Meditsinskogo Universiteta Gosudarstvennoe Uchrezhdenie Zdravookhraneniya goroda Moskvy Gorodskaya Klinicheskaya Bolnitsa #4 Departamenta Zdravookhraneniya goroda Moskvy/ 25, ul, Pavlovskaya Moskva, 115093 RUSSIAN FEDERATION | Ethicheskii Comitet Gosudarstvennogo Obrazovatel'nogo Uchrezhdeniya RGMU 1. UL. Ostrovitlanova Moskva, 117997 RUSSIAN FEDERATION<br><br>Ethicheskii Comitet Pri Federalnom Organe Kontrolia Kachestva Lekarstvennikh Sredstv Petrovskii Boulvar 8, Build. 3 Moskva, 127051 RUSSIAN FEDERATION |
| 1119          | Prof. Nikolai M.J. Fedorovskiy |                           | Dr. Sergey Y. Batrikin<br>Dr. Alexey M. Ovechkin<br>Dr. Alexander A. Petrov                   | Gosudarstvennoe Uchrezhdenie Zdravookhraneniya Goroda Moskvy Gorodskaya Klinicheskaya Bolnitsa #67 Komiteta Zdravookhraneniya Moskvy, Otdelenie Intensivnoy Terapii UL. Salyama Adilya, D.2 Moscow, 123448 RUSSIAN FEDERATION                                                                                                                                                                                                                                                                                                                                        | Ethicheskii Comitet Pri Federalnom Organe Kontrolia Kachestva Lekarstvennikh Sredstv Petrovskii Boulvar 8, Build. 3 Moskva, 127051 RUSSIAN FEDERATION<br><br>Ethicheskii Comitet pri Gorodskaya klinicheskaya bolnitsa # 67 ul. Salyama Adilya,d.2 Moskva, 123448 RUSSIAN FEDERATION          |

| <u>Center</u> | <u>Principal Investigator</u> | <u>Co-Investigator(s)</u> | <u>Sub-Investigator(s)</u>                                                                                               | <u>Address(es)</u>                                                                                                                    | <u>Institutional Review Board or Ethics Committee Address(es)</u>                                                                                                                                                                                                                                         |
|---------------|-------------------------------|---------------------------|--------------------------------------------------------------------------------------------------------------------------|---------------------------------------------------------------------------------------------------------------------------------------|-----------------------------------------------------------------------------------------------------------------------------------------------------------------------------------------------------------------------------------------------------------------------------------------------------------|
| 1225          | Dr. Natalia V. Dmitrieva      |                           | Dr. Zlata V. Grigoryevskaya<br>Dr. Elena Valentinovna Kulaga<br>Dr. Irina N. Petukhova<br>Dr. Elena Nikolayevna Sokolova | National Cancer Research Center RAMS; Laboratory Microbiological Diagnostics Kashirskoe shosse, 24, Moscow, 115478 RUSSIAN FEDERATION | Ethics Committee at the Federal Service on Surveillance in Healthcare and Social Development 8, str. 2, Petrovskij bulvar Moscow, 127051 RUSSIAN FEDERATION<br><br>Ethics Committee of RUSSIAN ONCOLOGICAL RESEARCH CENTER n.a. N.N. BLOKHIN RAMS Kashirskoe shosse, 24 Moscow, 115478 RUSSIAN FEDERATION |

090177e1816ca80c\Approved\Approved On: 06-Oct-2010 15:16

\* Did not randomize subjects

**Singapore**

**Coordinating Investigators:**

<None Entered>

| <u>Center</u> | <u>Principal Investigator</u>                                        | <u>Co-Investigator(s)</u> | <u>Sub-Investigator(s)</u>                                              | <u>Address(es)</u>                                          | <u>Institutional Review Board or Ethics Committee Address(es)</u>                                                                                                                                        |
|---------------|----------------------------------------------------------------------|---------------------------|-------------------------------------------------------------------------|-------------------------------------------------------------|----------------------------------------------------------------------------------------------------------------------------------------------------------------------------------------------------------|
| 1098          | Dr. Jagadesan Raghuram<br>(Previous PI)<br>Dr. Kenneth Ping Wah Chan |                           | Dr. Constance Pau Lin Lo<br>Dr. Ghee Chee Phua<br>Dr. Steve Tze Yi Yang | Singapore General Hospital<br>Outram Road<br>,<br>SINGAPORE | SingHealth Centralized Institutional Review Board<br>Singapore Health Services Pte Ltd<br>Blk A, 7 Hospital Drive,<br>SingHealth Research Facilities, #03-01<br>Singapore, Singapore 169611<br>SINGAPORE |

090177e1816ca80c\Approved\Approved On: 06-Oct-2010 15:16

\* Did not randomize subjects

**South Africa**

**Coordinating Investigators:**

<None Entered>

| <u>Center</u> | <u>Principal Investigator</u> | <u>Co-Investigator(s)</u> | <u>Sub-Investigator(s)</u>                                                                                                                                                               | <u>Address(es)</u>                                                                                                                                                                   | <u>Institutional Review Board or Ethics Committee Address(es)</u>                                                                                                                                                                                                                       |
|---------------|-------------------------------|---------------------------|------------------------------------------------------------------------------------------------------------------------------------------------------------------------------------------|--------------------------------------------------------------------------------------------------------------------------------------------------------------------------------------|-----------------------------------------------------------------------------------------------------------------------------------------------------------------------------------------------------------------------------------------------------------------------------------------|
| 1108          | Dr. Murimisi Demmy Mukansi    |                           | Dr. John O. Opolot                                                                                                                                                                       | Helen Joseph Hospital<br>Perth Road<br>Auckland Park, 2006<br>SOUTH AFRICA                                                                                                           | University of the Witwatersrand<br>Human Research Ethics<br>Committee(Medical)<br>Division of the Deputy Registrar<br>(Research)<br>Department of Research, Senate<br>House<br>University of the Witwatersrand<br>1 Jan Smuts Avenue<br>Braamfontein, Johannesburg 2000<br>SOUTH AFRICA |
| 1109          | Dr. Brandon William Piketh    |                           | Dr. Christine Banage<br>Dr. Jacqueline Monika Brown<br>Dr. Linda Gabrielle Doedens<br>Dr. Lufuno Rudo Mathivha<br>Dr. Shahed Omar<br>Dr. Remy M'Pio Toko<br>Dr. Richard Peter Von Rahden | Chris Hani Baragwanath Hospital<br>Old Potchefstroom Road<br>Soweto, 2013<br>SOUTH AFRICA                                                                                            | University of Witwatersrand Human<br>Ethics Committee (Medical)<br>Division of the Deputy Registrar<br>(Research), Department of Research,<br>Senate House<br>University of the Witwatersrand<br>1 Jan Smuts Avenue<br>Braamfontein, Johannesburg 2000<br>SOUTH AFRICA                  |
| 1113 *        | Dr. Justus G. Kilian          |                           | Dr Joachim Hendrik Venter                                                                                                                                                                | Wilgers Hospital<br>Denneboom Avenue<br>Die Wilgers X14, 0041<br>SOUTH AFRICA<br><br>Wilmed Medical Research<br>Projects<br>28 Beuke Place<br>Die Wilgers X 14, 0041<br>SOUTH AFRICA | Pharma - Ethics Independent<br>Research Ethics Committee<br>123 Amcor Road<br>Lyttleton Manor, 0157<br>SOUTH AFRICA                                                                                                                                                                     |

090177e1816ca80c\Approved\Approved On: 06-Oct-2010 15:16

\* Did not randomize subjects

| <u>Center</u> | <u>Principal Investigator</u> | <u>Co-Investigator(s)</u> | <u>Sub-Investigator(s)</u>                                        | <u>Address(es)</u>                                                            | <u>Institutional Review Board or Ethics Committee Address(es)</u>                                                   |
|---------------|-------------------------------|---------------------------|-------------------------------------------------------------------|-------------------------------------------------------------------------------|---------------------------------------------------------------------------------------------------------------------|
| 1114          | Dr. Gilbert John Gibson       |                           | Dr. Frederik Christoffel<br>Johannes Bester<br>Ignatius P. Immink | Rose Park Hospital<br>53 Gustav Crescent<br>Bloefontein, 9301<br>SOUTH AFRICA | Pharma - Ethics Independent<br>Research Ethics Committee<br>123 Amcor Road<br>Lyttleton Manor, 0157<br>SOUTH AFRICA |

090177e1816ca80c\Approved\Approved On: 06-Oct-2010 15:16

\* Did not randomize subjects



**Spain****Coordinating Investigators:**

&lt;None Entered&gt;

| <u>Center</u> | <u>Principal Investigator</u>  | <u>Co-Investigator(s)</u> | <u>Sub-Investigator(s)</u>                                                               | <u>Address(es)</u>                                                                                                                        | <u>Institutional Review Board or Ethics Committee Address(es)</u>                                                                                                                         |
|---------------|--------------------------------|---------------------------|------------------------------------------------------------------------------------------|-------------------------------------------------------------------------------------------------------------------------------------------|-------------------------------------------------------------------------------------------------------------------------------------------------------------------------------------------|
| 1103          | Dr. Manuel Soler               |                           | Hipolito E. Perez Molto<br>JAVIER SARMIENTO                                              | HOSPITAL DE BADALONA<br>GERMANS TRIAS I PUJOL<br>SERVICIO DE UCI<br>CARRETERA DEL CANYET,<br>S/N<br>BADALONA, BARCELONA<br>08916<br>SPAIN | Hospital Universitari Germans Trias i Pujol<br>Ethics Committee of Clinic Investigation<br>Ctra del Canyet, s/n<br>Servicio de Farmacologia Clinica<br>Badalona, Barcelona 08916<br>SPAIN |
| 1104 *        | Dr. Emilio S. Bouza            |                           | Juan Manuel Garcia<br>Paloma Gijon<br>Dr. Patricia Munoz<br>Belen Padilla<br>Mar Sanchez | HOSPITAL UNIVERSITARIO<br>GREGORIO MARAÑON<br>SERVICIO DE<br>MICROBIOLOGIA<br>C/ DR. ESQUERDO, 46<br>MADRID, MADRID 28009<br>SPAIN        | Hospital General Universitario Gregorio Marañon<br>Ethics Committee of Clinic Investigation<br>C/ Dr. Esquerdo, N° 46<br>Madrid, 28007<br>SPAIN                                           |
| 1115          | Dr. Francisco Alvarez<br>Lerma |                           | Yolanda Diaz Buendia<br>Dr. Dolores Marzo<br>Ana Isabel Perez Martin                     | Hospital Del Mar/Servicio de medicina intensiva<br>Paseo Maritimo 25-29<br>Barcelona, Barcelona 08003<br>SPAIN                            | Comite Etico de Investigacion Clinica<br>Instituto Municipal de Asistencia Sanitaria (IMAS)<br>Calle Doctor Aiguader, no. 80<br>Barcelona, 08003<br>SPAIN                                 |

\* Did not randomize subjects

6-Oct-2010 09:23

| <u>Center</u> | <u>Principal Investigator</u> | <u>Co-Investigator(s)</u> | <u>Sub-Investigator(s)</u>                                                                              | <u>Address(es)</u>                                                                                                                 | <u>Institutional Review Board or Ethics Committee Address(es)</u>                                                                                                                                                                                                                               |
|---------------|-------------------------------|---------------------------|---------------------------------------------------------------------------------------------------------|------------------------------------------------------------------------------------------------------------------------------------|-------------------------------------------------------------------------------------------------------------------------------------------------------------------------------------------------------------------------------------------------------------------------------------------------|
| 1116          | Dr. Antonio Torres            |                           | Silvia Blanco<br>Dr. Miguel Ferrer<br>Adamantia Liapikou<br>Dr. Antonio Moreno<br>Dr. Mauricio Valencia | Hospital Clinic I Provincial<br>Servicio de Neumologia<br>C/ Villarroel 170<br>Barcelona, Barcelona 08036<br>SPAIN                 | COMITE ETICO DE<br>INVESTIGACION CLINICA<br>HOSPITAL CLINIC i<br>PROVINCIAL<br>C/ VILLARROEL, 170<br>BARCELONA, 08036<br>SPAIN<br><br>Comite Etico de Investigacion<br>Clinica (CEIC)<br>Hospital Universitario Germans trias<br>i Pujol<br>Carretera de Canyet s/n<br>Badalona, 08916<br>SPAIN |
| 1159          | Juan Jose Picazo              |                           | Mercedes Nieto<br>Prof. Elisa Perez-Cecilia                                                             | HOSPITAL CLINICO SAN<br>CARLOS<br>SERVICIO DE<br>MICROBIOLOGIA<br>AVDA. PROF. MARTIN<br>LAGOS S/N<br>MADRID, MADRID 28040<br>SPAIN | Hospital Clinico San Carlos<br>ETHICS COMMITTEE OF<br>CLINICAL INVESTIGATION<br>C/ DR. MARTIN LAGOS, S/N<br>MADRID, MADRID 28040<br>SPAIN                                                                                                                                                       |

090177e1816ca80c\Approved\Approved On: 06-Oct-2010 15:16

\* Did not randomize subjects

**Taiwan****Coordinating Investigators:**

&lt;None Entered&gt;

| <u>Center</u> | <u>Principal Investigator</u> | <u>Co-Investigator(s)</u> | <u>Sub-Investigator(s)</u>               | <u>Address(es)</u>                                                                               | <u>Institutional Review Board or Ethics Committee Address(es)</u>                                                                                                                                                          |
|---------------|-------------------------------|---------------------------|------------------------------------------|--------------------------------------------------------------------------------------------------|----------------------------------------------------------------------------------------------------------------------------------------------------------------------------------------------------------------------------|
| 1093          | Dr. Jen-hsien Wang            |                           | Dr. Chih-Ming Chen<br>Dr. Cheng-Mao Ho   | China Medical University<br>Hospital<br>2 Yuh Der Road<br>Taichung, 404<br>TAIWAN                | Research Ethics Review Committee,<br>China Medical University Hospital<br>2 Yuh Der Road<br>Taichung, 404<br>TAIWAN                                                                                                        |
| 1094          | Dr. Po-ren Hsueh              |                           | Dr. Kuan-Yu Chen                         | National Taiwan University<br>Hospital<br>7, Chung-Shan South Road<br>Taipei, 100<br>TAIWAN      | National Taiwan University Hospital,<br>Ethics Committee<br>7 Chung Shan South Road<br>Taipei, 10012<br>TAIWAN                                                                                                             |
| 1096          | Dr. Yao-Shen Chen             |                           | Dr. Ming-Hsin Mai<br>Dr. Yung-Hsing Wang | Kaosiung Veterans General<br>Hospital<br>386, Ta-Chung First Road<br>Kaohsiung, 813<br>TAIWAN    | Joint Institutional Review Board<br>201 Shih-Pai Road, Section 2<br>Taipei, 112<br>TAIWAN<br><br>Kaohsiung Veterans General<br>Hospital, Institutional Review Board<br>386 Ta-Chung First Road<br>Kaohsiung, 813<br>TAIWAN |
| 1242          | Dr. Chun-Hsing Liao           |                           | Dr. Hou-Tai Chang                        | Far-Eastern Memorial Hospital<br>21, Nan-Ya South Road, Section<br>2<br>Pan-Chiao, 220<br>TAIWAN | Far Eastern Memorial Hospital,<br>Research Ethics Review Committee<br>21, Nan-Ya South Road, Section 2<br>Pan-Chiao, Taipei<br>TAIWAN                                                                                      |

090177e1816ca80c\Approved\Approved On: 06-Oct-2010 15:16

**Turkey****Coordinating Investigators:**

&lt;None Entered&gt;

| <u>Center</u> | <u>Principal Investigator</u> | <u>Co-Investigator(s)</u> | <u>Sub-Investigator(s)</u>                                                                                                                | <u>Address(es)</u>                                                                                                                | <u>Institutional Review Board or Ethics Committee Address(es)</u>                                                                                                                                                                                                                                                                                          |
|---------------|-------------------------------|---------------------------|-------------------------------------------------------------------------------------------------------------------------------------------|-----------------------------------------------------------------------------------------------------------------------------------|------------------------------------------------------------------------------------------------------------------------------------------------------------------------------------------------------------------------------------------------------------------------------------------------------------------------------------------------------------|
| 1209          | Prof. Dr. Serhat Unal         |                           | Dr. Defne Altintas<br>Dr. Nursel Calik Basaran<br>Assist. Prof. Dr. Kutay Demirkan<br>Arife Ozveren<br>Assoc. Prof. Dr. Arzu Topeli Iskit | Hacettepe University Medical Faculty<br>Infectious Diseases<br>Sihhiye<br>Ankara, 06100<br>TURKEY                                 | Hacettepe University<br>Local Ethics Committee<br>Ankara,<br>TURKEY<br><br>Turkish Ministry of Health Central<br>Ethics Committee<br>T.R. Ministry of Health<br>Pharmaceutical General Directorate<br>Central Ethics Committee /<br>Regulatory Authority<br>Cankiri Cad. 57<br>Diskapi ı Ulus<br>ANKARA, 06060<br>TURKEY                                   |
| 1214 *        | Prof. Dr. Recep Ozturk        |                           | Prof. Dr. Yalim Dikmen<br>Dr. Bilgul Mete<br>Assoc. Prof. Dr. Resat Ozaras                                                                | Istanbul University Cerrahpasa<br>Med. Fac. Clinical Microbiology<br>and Infectious Diseases Dept.<br>Aksaray, Istanbul<br>TURKEY | Turkish Ministry of Health Central<br>Ethics Committee<br>T.R. Ministry of Health<br>Pharmaceutical General Directorate<br>Central Ethics Committee /<br>Regulatory Authority<br>Cankiri Cad. 57<br>Diskapi ı Ulus<br>ANKARA, 06060<br>TURKEY<br><br>University of Istanbul<br>Local Ethics Committee Cerrahpasa<br>Medical Faculty<br>Istanbul,<br>TURKEY |

\* Did not randomize subjects

6-Oct-2010 09:23

| <u>Center</u> | <u>Principal Investigator</u> | <u>Co-Investigator(s)</u> | <u>Sub-Investigator(s)</u>                                                                                   | <u>Address(es)</u>                                                                                                    | <u>Institutional Review Board or Ethics Committee Address(es)</u>                                                                                                                                                                                                                                                                             |
|---------------|-------------------------------|---------------------------|--------------------------------------------------------------------------------------------------------------|-----------------------------------------------------------------------------------------------------------------------|-----------------------------------------------------------------------------------------------------------------------------------------------------------------------------------------------------------------------------------------------------------------------------------------------------------------------------------------------|
| 1215 *        | Prof. Dr. Volkan Korten       |                           | Prof. Dr. Turgay Celikel<br>Dr. Emel Eryuksel<br>Dr. Lutfiye Mulazimoglu<br>Assoc. Prof. Dr. Zekaver Odabasi | Marmara University Med. Fac.<br>Infectious Diseases and Clinical Microbiology Dept.<br>Altunizade, Istanbul<br>TURKEY | Marmara University School of Med.<br>Ethics Committee<br>Istanbul,<br>TURKEY<br><br>Turkish Ministry of Health Central<br>Ethics Committee<br>T.R. Ministry of Health<br>Pharmaceutical General Directorate<br>Central Ethics Committee /<br>Regulatory Authority<br>Cankiri Cad. 57<br>Diskapi ı Ulus<br>ANKARA, 06060<br>TURKEY             |
| 1216 *        | Prof. Dr. Sercan Ulusoy       |                           | Dr. Bilgin Arda<br>Assoc. Prof. Dr. Feza Bacakoglu<br>Dr. Husnu Pullukcu<br>Assoc. Prof. Dr. Alper Tunger    | Ege University Med. Fac.<br>Infectious Diseases and Clinical Microbiology Dept.<br>Bornova, Izmir<br>TURKEY           | Ethics Committee of Medical<br>Faculty, Ege University<br>Bornova-Izmir, 35100<br>TURKEY<br><br>Turkish Ministry of Health Central<br>Ethics Committee<br>T.R. Ministry of Health<br>Pharmaceutical General Directorate<br>Central Ethics Committee /<br>Regulatory Authority<br>Cankiri Cad. 57<br>Diskapi ı Ulus<br>ANKARA, 06060<br>TURKEY |

| <u>Center</u> | <u>Principal Investigator</u> | <u>Co-Investigator(s)</u> | <u>Sub-Investigator(s)</u>   | <u>Address(es)</u>                                                                                    | <u>Institutional Review Board or Ethics Committee Address(es)</u>                                                                                                                                                                                                                                                                                     |
|---------------|-------------------------------|---------------------------|------------------------------|-------------------------------------------------------------------------------------------------------|-------------------------------------------------------------------------------------------------------------------------------------------------------------------------------------------------------------------------------------------------------------------------------------------------------------------------------------------------------|
| 1217 *        | Prof. Dr. Halis Akalin        |                           | Assoc. Prof. Dr. Emel Yilmaz | Uludag University Med. Fac.<br>Microbiology and Infectious Diseases Dept.<br>Gorukle, Bursa<br>TURKEY | Turkish Ministry of Health Central Ethics Committee<br>T.R. Ministry of Health<br>Pharmaceutical General Directorate<br>Central Ethics Committee /<br>Regulatory Authority<br>Cankiri Cad. 57<br>Diskapi  Ulus<br>ANKARA, 06060<br>TURKEY<br><br>Uludag University School of Med.<br>Ethics Committee<br>Tip Fakultesi Dekanligi<br>Bursa,<br>TURKEY |

090177e1816ca80c\Approved\Approved On: 06-Oct-2010 15:16

\* Did not randomize subjects

**United Kingdom**

**Coordinating Investigators:**

<None Entered>

| <u>Center</u> | <u>Principal Investigator</u> | <u>Co-Investigator(s)</u> | <u>Sub-Investigator(s)</u>                                                                                              | <u>Address(es)</u>                                                                                                                                          | <u>Institutional Review Board or Ethics Committee Address(es)</u>                                                                                                                                                                                                                                                                 |
|---------------|-------------------------------|---------------------------|-------------------------------------------------------------------------------------------------------------------------|-------------------------------------------------------------------------------------------------------------------------------------------------------------|-----------------------------------------------------------------------------------------------------------------------------------------------------------------------------------------------------------------------------------------------------------------------------------------------------------------------------------|
| 1126 *        | Dr. Mark Wilcox               |                           |                                                                                                                         | Leeds General Infirmary/ Old Medical School/ Department of Microbiology<br>Great George Street<br>Leeds, LS1 3EX<br>UNITED KINGDOM                          | West Midlands Research Ethics Committee<br>West Midlands Research Ethics Committee<br>Prospect House<br>Fishing Line Road<br>Enfield, Redditch B97 6EW<br>UNITED KINGDOM                                                                                                                                                          |
| 1189          | Dr. David G. Swann            |                           | Dr. Andrew Conway<br>Morris<br>Dr. Brian Cook<br>Dr. Nazir Lone<br>Dr. Olga Lucia Moncayo<br>Dr. Timothy Simon<br>Walsh | Royal Infirmary of Edinburgh<br>Dept. of Anaesthesia, Critical Care and Pain Medicine<br>51 Little France Crescent<br>Edinburgh, EH16 4SA<br>UNITED KINGDOM | West Midlands Research Ethics Committee<br>West Midlands Research Ethics Committee<br>Prospect House<br>Fishing Line Road<br>Enfield, Redditch B97 6EW<br>UNITED KINGDOM                                                                                                                                                          |
| 1227          | Dr. Mark Sair                 |                           | Dr. Richard Cunningham<br>Dr. Michael Duffy<br>Dr. Peter MacNaughton                                                    | Intensive Care Unit, Level 4<br>Derriford Hospital<br>Plymouth, Devon PL6 8DH<br>UNITED KINGDOM                                                             | Cornwall & Plymouth REC<br>Room 101B, ITTC South Building<br>Tamar Science Park<br>Davy Road,<br>Derriford<br>Plymouth, PL6 8BX<br>UNITED KINGDOM<br><br>West Midlands Research Ethics Committee<br>West Midlands Research Ethics Committee<br>Prospect House<br>Fishing Line Road<br>Enfield, Redditch B97 6EW<br>UNITED KINGDOM |

090177e1816ca80c\Approved\Approved On: 06-Oct-2010 15:16

\* Did not randomize subjects

---

| <u>Center</u> | <u>Principal Investigator</u> | <u>Co-Investigator(s)</u> | <u>Sub-Investigator(s)</u> | <u>Address(es)</u> | <u>Institutional Review Board or<br/>Ethics Committee Address(es)</u> |
|---------------|-------------------------------|---------------------------|----------------------------|--------------------|-----------------------------------------------------------------------|
|---------------|-------------------------------|---------------------------|----------------------------|--------------------|-----------------------------------------------------------------------|

090177e1816ca80c\Approved\Approved On: 06-Oct-2010 15:16

---

\* Did not randomize subjects



**United States**

**Coordinating Investigators:**

<None Entered>

| <u>Center</u> | <u>Principal Investigator</u> | <u>Co-Investigator(s)</u> | <u>Sub-Investigator(s)</u>                                                                                                                                                                                                                                                                                                                                                                | <u>Address(es)</u>                                                                                                                                                                                                                               | <u>Institutional Review Board or Ethics Committee Address(es)</u>                                                                                                                                   |
|---------------|-------------------------------|---------------------------|-------------------------------------------------------------------------------------------------------------------------------------------------------------------------------------------------------------------------------------------------------------------------------------------------------------------------------------------------------------------------------------------|--------------------------------------------------------------------------------------------------------------------------------------------------------------------------------------------------------------------------------------------------|-----------------------------------------------------------------------------------------------------------------------------------------------------------------------------------------------------|
| 1001          | Dr. Addison Kemp May          |                           | Dr. Bryan Richard Collier<br>Dr. Ann Marie Conquest<br>Bryan A. Cotton<br>Dr. Jose Jesus Diaz Jr.<br>Dr. Oscar D. Guillamondegui<br>Dr. Oliver Lee Gunter Jr.<br>Dr. Jeffrey Scott Guy<br>Ms. Judith M. Jenkins<br>Dr. Gary T. Marshall<br>Dr. Vicente Alonso Mejia<br>Dr. Richard Stephen Miller<br>Dr. John Albert Morris Jr.<br>Dr. William P. Riordan                                 | Hope Cambell Pharmacy<br>Vanderbilt University Medical Center<br>1211 22nd Ave. South<br>Nashville, TN 37232<br>UNITED STATES<br><br>VANDERBILT UNIVERSITY MEDICAL CENTER<br>1161 21ST AVENUE SOUTH<br>NASHVILLE, TN 37232-7110<br>UNITED STATES | Vanderbilt University Institutional Review Board<br>Vanderbilt University Institutional Review Board<br>504 Oxford House<br>1313 21st Ave South<br>Nashville, TN 37232-4315<br>UNITED STATES        |
| 1010          | Dr. Robert Jeffrey Kaner      |                           | Dr. John Paul Ayala<br>Steven Benkert<br>Dr. David A. Berlin<br>Dr. Joseph Thaddeus Cooke<br>Dr. Laura E. Crowley<br>Dr. Brian Gelbman<br>Dr. Ben-Gary Harvey<br>Dr. Rana Kaplan<br>Dr. Juhayna Kassem<br>Dr. Thomas K.C. King<br>Dr. Leah Lande<br>Francisco Pacheco<br>Dr. Abraham Sanders<br>Dr. Lynne M. Strasfeld<br>Dr. Meredith L. Turetz<br>Dr. Setu K. Vora<br>Dr. Dana Zappetti | New York Presbyterian Hosp/Weill Medical College of Cornell Univ<br>Ste 505<br>520 E 70th St<br>New York, NY 10021-9800<br>UNITED STATES                                                                                                         | New York Presbyterian Hospital, Weill Medical College of Cornell University<br>Committee on Human Rights in Research<br>Suite DV-301<br>425 East 61st Street<br>New York, NY 10021<br>UNITED STATES |

090177e1816ca80c\Approved\Approved On: 06-Oct-2010 15:16

\* Did not randomize subjects

| <u>Center</u> | <u>Principal Investigator</u>                                               | <u>Co-Investigator(s)</u> | <u>Sub-Investigator(s)</u>                                                        | <u>Address(es)</u>                                                                                                                                                                                             | <u>Institutional Review Board or Ethics Committee Address(es)</u>                                                                                                                                                                                                                            |
|---------------|-----------------------------------------------------------------------------|---------------------------|-----------------------------------------------------------------------------------|----------------------------------------------------------------------------------------------------------------------------------------------------------------------------------------------------------------|----------------------------------------------------------------------------------------------------------------------------------------------------------------------------------------------------------------------------------------------------------------------------------------------|
| 1005          | Dr. Ali Albert El-Solh                                                      |                           | Dr. Alan T. Aquilina<br>DR ARCHANA<br>MISHRA<br>Dr. Lilibeth Pineda               | Erie County Medical Center<br>462 Grider Street<br>Buffalo, NY 14215<br>UNITED STATES                                                                                                                          | University of Buffalo, The State<br>University of New York<br>Universtiy of Buffalo Health<br>Sciences Institutional Review Board<br>&<br>Institutional Animal Care and Use<br>Committee<br>150 Parker Hall<br>University of Buffalo South Campus<br>Buffalo, NY 14214-8004<br>UNITED STATES |
| 1003 *        | Dr. Larry Marc Bush                                                         |                           |                                                                                   | JFK Medical Center<br>5301 South Congress Ave<br>Atlantis, FL 33462<br>UNITED STATES<br><br>South Florida Clinical Research<br>Suite #104<br>5503 South Congress Avenue<br>Atlantis, FL 33462<br>UNITED STATES | Western Institutional Review Board<br>3535 Seventh Avenue, SW<br>Olympia, WA 98502<br>UNITED STATES                                                                                                                                                                                          |
| 1016 *        | Dr. Devendra Natverlal<br>Amin (Previous PI)<br>Dr. Ressa Marie<br>McDonald |                           | Dr. Devendra Natverlal<br>Amin<br>Dr. Eli H. Freilich<br>Dr. John Alan Masson Jr. | Bay Area Chest Physicians<br>616 East St<br>Clearwater, FL 33756-3342<br>UNITED STATES<br><br>Morton Plant Hospital<br>300 Pinellas Street<br>Clearwater, FL 33756<br>UNITED STATES                            | Morton Plant Mease Healthcare<br>Institutional Review Board<br>MS 143<br>207 Jeffords Street<br>Clearwater, FL 33756<br>UNITED STATES                                                                                                                                                        |
| 1011 *        | Dr. Richard Wayne<br>Kearley                                                |                           | Dr. Ronald Ernest Fields                                                          | Our Lady of the Lake Medical<br>Center<br>5000 Hennessy Blvd<br>Baton Rouge, LA 70808<br>UNITED STATES                                                                                                         | Our Lady of the Lake Hospital, Inc<br>Institutional Review Board<br>5000 Hennessy Blvd<br>Baton Rouge, LA 70808<br>UNITED STATES                                                                                                                                                             |

090177e1816ca80c\Approved\Approved On: 06-Oct-2010 15:16

\* Did not randomize subjects

| <u>Center</u> | <u>Principal Investigator</u> | <u>Co-Investigator(s)</u> | <u>Sub-Investigator(s)</u>                                                  | <u>Address(es)</u>                                                                                                                                                                                             | <u>Institutional Review Board or Ethics Committee Address(es)</u>                                                                                                                                                                                                                                         |
|---------------|-------------------------------|---------------------------|-----------------------------------------------------------------------------|----------------------------------------------------------------------------------------------------------------------------------------------------------------------------------------------------------------|-----------------------------------------------------------------------------------------------------------------------------------------------------------------------------------------------------------------------------------------------------------------------------------------------------------|
| 1015          | Dr. Daniel George Lorch Jr.   |                           | Dr. Arthur Edward Graves<br>Dr. Thomas P. Hooker<br>Dr. Richard Shaw Powell | Brandon Regional Hospital<br>119 Oakfield Drive<br>Brandon, FL 33511<br>UNITED STATES<br><br>Pulmonary Associates of Brandon<br>Suite 102<br>910 Oakfield Drive<br>Brandon, FL 33511<br>UNITED STATES          | Brandon Regional Hospital<br>Institutional Review Board<br>119 Oakfield Drive<br>Brandon, FL 33551<br>UNITED STATES                                                                                                                                                                                       |
| 1004          | Dr. Charles Mark Carpati      |                           | Dr. Mark E. Astriz<br>Michelle Glater<br>Dr. Linda A. Kirschenbaum          | St. Vincent's Hospital - Manhattan<br>170 West 12th Street<br>New York, NY 10011<br>UNITED STATES                                                                                                              | Biomedical Research Alliance of New York, LLC<br>Suite 100<br>225 Community Drive<br>Great Neck, NY 11021<br>UNITED STATES<br><br>Saint Vincent's Catholic Medical Centers<br>Integrated Scientific and Ethical Review Board<br>170 West 12th Street - Staff House<br>New York, NY 10011<br>UNITED STATES |
| 1018          | Dr. Gary J. Richmond          |                           | Vernon F. Appleby<br>Robert Kralejvich                                      | Broward General Medical Center<br>1600 South Andrews Ave<br>Fort Lauderdale, FL 33316<br>UNITED STATES<br><br>Gary J Richmond MD PA<br>315 Southeast 14th Street<br>Fort Lauderdale, FL 33316<br>UNITED STATES | Broward Health Institutional Review Board<br>1600 South Andrews Avenue<br>Fort Lauderdale, FL 33316<br>UNITED STATES                                                                                                                                                                                      |

090177e1816ca80c\Approved\Approved On: 06-Oct-2010 15:16

\* Did not randomize subjects

090177e1816ca80c\Approved\Approved On: 06-Oct-2010 15:16

| <u>Center</u> | <u>Principal Investigator</u>                                                 | <u>Co-Investigator(s)</u> | <u>Sub-Investigator(s)</u>                                                                                                                                                                                                                                | <u>Address(es)</u>                                                                                                                                                                                                        | <u>Institutional Review Board or Ethics Committee Address(es)</u>                                                                                                                 |
|---------------|-------------------------------------------------------------------------------|---------------------------|-----------------------------------------------------------------------------------------------------------------------------------------------------------------------------------------------------------------------------------------------------------|---------------------------------------------------------------------------------------------------------------------------------------------------------------------------------------------------------------------------|-----------------------------------------------------------------------------------------------------------------------------------------------------------------------------------|
| 1023          | Dr. William T. McGee                                                          |                           | Dr. Lori E. Circeo<br>Dr. Thomas L. Higgins<br>Dr. Paul G. Jodka<br>Cynthia Kardos<br>Gerald Korona<br>Lori-Ann Kozikowski<br>Dr. Patrick T. Mailloux<br>Dr. Jay S. Steingrub<br>Dr. Gary J. Tereso<br>Mark A. Tidswell                                   | Baystate Medical Center<br>759 Chestnut Ave<br>Springfield, MA 01199<br>UNITED STATES                                                                                                                                     | Baystate Medical Center<br>Institutional Review Board<br>759 Chestnut Street<br>Springfield, MA 01199<br>UNITED STATES                                                            |
| 1034          | Dr. Keith M. Clance<br>(Previous PI)<br>Dr. Patrick Eugene Glen<br>Wright Jr. |                           | Rakesh Alva<br>Robert Byrum<br>Dr. Keith M. Clance<br>Daniel Feinstein<br>Jeremy Frens<br>Dr. Carmen Laura<br>Gonzalez<br>Dr. Jeffery C. Hatcher<br>Murali Ramaswamy<br>Dr. David B. Simonds<br>Vineet Sood<br>Dr. Michael B. Wert<br>Dr. Wesam G. Yacoub | Moses Cone H. Memorial<br>Hospital<br>1200 North Elm Street<br>Greensboro, NC 27401<br>UNITED STATES<br><br>Piedmont Respiratory Research<br>Foundation<br>1200 North Elm Street<br>Greensboro, NC 27401<br>UNITED STATES | Moses Cone Health System<br>Office of Research Support, The<br>Institutional Review Board (IRB)<br>1200 North Elm Street<br>Greensboro, NC 27401-1020<br>UNITED STATES            |
| 1021          | Dr. Daniel Hugh Kett                                                          |                           | Dr. Debra P. Fertel<br>Karen Marshall<br>Dr. Andrew Alan Quartin<br>Dr. Roland Milo Schein                                                                                                                                                                | University of Miami School of<br>Medicine/Jackson Memorial<br>Hospital<br>1611 NW 12th Avenue<br>Miami, FL 33136<br>UNITED STATES                                                                                         | University of Miami, School Of<br>Medicine<br>Human Subjects Research Office<br>Tenth Floor, Suite 1000 (M-809)<br>1500 Northwest 12th Avenue<br>Miami, FL 33136<br>UNITED STATES |

\* Did not randomize subjects

090177e1816ca80c\Approved\Approved On: 06-Oct-2010 15:16

| <u>Center</u> | <u>Principal Investigator</u>                                    | <u>Co-Investigator(s)</u> | <u>Sub-Investigator(s)</u>                                                                              | <u>Address(es)</u>                                                                                                                                                                                                                                                                                                                                                                       | <u>Institutional Review Board or Ethics Committee Address(es)</u>                                                           |
|---------------|------------------------------------------------------------------|---------------------------|---------------------------------------------------------------------------------------------------------|------------------------------------------------------------------------------------------------------------------------------------------------------------------------------------------------------------------------------------------------------------------------------------------------------------------------------------------------------------------------------------------|-----------------------------------------------------------------------------------------------------------------------------|
| 1020          | Dr. Jose A. Vazquez<br>(Previous PI)<br>Dr. Patricia Diane Brown |                           | Dr. John R. Ebright<br>Suzanne Woodrich                                                                 | <p>Detroit Receiving Hospital<br/>4201 St. Antoine<br/>Detroit, MI 48201<br/>UNITED STATES</p> <p>Harper University Hospital<br/>3990 John R<br/>5 Hudson<br/>Detroit, MI 48210<br/>UNITED STATES</p> <p>Karmanos Cancer Center<br/>4100 John R<br/>Detroit, MI 48201<br/>UNITED STATES</p> <p>University Health Center<br/>4201 St. Antoine<br/>Detroit, MI 48201<br/>UNITED STATES</p> | Wayne State University Human Investigation Committee<br>101 East Alexandrine Building<br>Detroit, MI 48201<br>UNITED STATES |
| 1026          | Dr. James R. Dexter                                              |                           | Dr. Enrique G. Gil<br>Corrinne Jackson<br>Dr. Theodore L. Shankel                                       | Redlands Community Hospital<br>350 Terracino Blvd<br>Redlands, CA 92373<br>UNITED STATES                                                                                                                                                                                                                                                                                                 | Redlands Community Hospital Ethics/IRB Committee<br>350 Terracina Boulevard<br>Redlands, CA 92373<br>UNITED STATES          |
| 1043          | Dr. Scott H. Beegle                                              |                           | Dr. Rachel S. Hinerman<br>Dr. Jonathan M. Rosen<br>Dr. Thomas Clinton Smith<br>Dr. Simon Daniel Spivack | Albany Medical Center<br>47 New Scotland Ave<br>Albany, NY 12208<br>UNITED STATES                                                                                                                                                                                                                                                                                                        | Western Institutional Review Board, Inc.<br>3535 Seventh Avenue, SW<br>Olympia, WA 98502<br>UNITED STATES                   |

\* Did not randomize subjects

| <u>Center</u> | <u>Principal Investigator</u> | <u>Co-Investigator(s)</u> | <u>Sub-Investigator(s)</u>                                                                                                                                                                      | <u>Address(es)</u>                                                                                                                                                                                                                                                                                                                                                                                                                                                                                                                                                                                  | <u>Institutional Review Board or Ethics Committee Address(es)</u>                                                                                         |
|---------------|-------------------------------|---------------------------|-------------------------------------------------------------------------------------------------------------------------------------------------------------------------------------------------|-----------------------------------------------------------------------------------------------------------------------------------------------------------------------------------------------------------------------------------------------------------------------------------------------------------------------------------------------------------------------------------------------------------------------------------------------------------------------------------------------------------------------------------------------------------------------------------------------------|-----------------------------------------------------------------------------------------------------------------------------------------------------------|
| 1009          | Dr. Christopher David Junker  |                           | Dr. Bruce Mathison Abell<br>Dr. Lakhmir S. Chawla<br>Dr. Guillermo Gutierrez<br>Dr. Michael Geren Seneff                                                                                        | George Washington University Hospital<br>900 23rd Street, NW<br>Washington, DC 20037<br>UNITED STATES                                                                                                                                                                                                                                                                                                                                                                                                                                                                                               | The George Washington University Committee on Human Research<br>Ross Hall Suite 612<br>2300 Eye Street Northwest<br>Washington, DC 20037<br>UNITED STATES |
| 1017          | Dr. Steven Douglas O'Marro    |                           | Dr. Sarah E. Boyd<br>Dr. Donald Richardson Graham<br>Holly E. Heffren<br>Dr. Douglas Ray Leigh<br>Praveen Mullangi<br>Robert W. Nelson<br>Jennifer Rogers<br>Dr. Mike Short<br>Amber S. Stanton | Memorial Medical Center<br>701 North First St.<br>Springfield, IL 62702<br>UNITED STATES<br><br>Springfield Clinic<br>1025 South Seventh Street<br>Springfield, IL 62703<br>UNITED STATES<br><br>Springfield Clinic Infectious Diseases<br>St. John's Pavilion<br>1st Floor<br>301 North Eighth Street<br>Springfield, IL 62701<br>UNITED STATES<br><br>Springfield Clinic Research Dept<br>Main Campus- West Building<br>Suite 4300<br>1025 S. 6th Street<br>Springfield, IL 62703<br>UNITED STATES<br><br>St. John's Hospital<br>800 East Carpenter St.<br>Springfield, IL 62702<br>UNITED STATES | Fox Commercial Institutional Review Board<br>Suite 202<br>133 South Fourth Street<br>Springfield, IL 62701<br>UNITED STATES                               |

090177e1816ca80c\Approved\Approved On: 06-Oct-2010 15:16

\* Did not randomize subjects

090177e1816ca80c\Approved\Approved On: 06-Oct-2010 15:16

| <u>Center</u> | <u>Principal Investigator</u>                                                   | <u>Co-Investigator(s)</u> | <u>Sub-Investigator(s)</u>                                                                     | <u>Address(es)</u>                                                                                                                                                                                                                            | <u>Institutional Review Board or Ethics Committee Address(es)</u>                                                                                                                                                                                                                                |
|---------------|---------------------------------------------------------------------------------|---------------------------|------------------------------------------------------------------------------------------------|-----------------------------------------------------------------------------------------------------------------------------------------------------------------------------------------------------------------------------------------------|--------------------------------------------------------------------------------------------------------------------------------------------------------------------------------------------------------------------------------------------------------------------------------------------------|
| 1022          | Dr. Matthew Michael<br>McCambridge<br>Stephen Charles Matchett<br>(Previous PI) |                           | Dr. Mark David Cipolle<br>Dr. Robert J. Kruklitis<br>Stephen Charles Matchett<br>Daniel E. Ray | Good Shepherd Specialty<br>Hospital<br>LVH-M South Tower<br>2545 Shoenersville Road<br>Bethlehem, PA 18017<br>UNITED STATES<br><br>Lehigh Valley Hospital<br>1200 South Cedar Crest Blvd<br>Allentown, PA 18103<br>UNITED STATES              | Lehigh Valley Hospital Institutional<br>Review Board<br>Health Studies Research<br>6th Floor, Suite 38<br>17th and Crew Streets<br>Allentown, PA 18104<br>UNITED STATES                                                                                                                          |
| 1032          | Dr. William Paul Saliski<br>Jr.                                                 |                           | Dr. Fred D. Hunker<br>Dr. Geton D. Lorino<br>Dr. David R. Thrasher                             | Long Term Hospital of<br>Montgomery<br>6th Floor, North Wing<br>1725 Pine Street<br>Montgomery, AL 36106<br>UNITED STATES<br><br>Montgomery Pulmonary<br>Consultants, PA<br>1440 Narrow Lane Parkway<br>Montgomery, AL 36111<br>UNITED STATES | Baptist Health System Institutional<br>Review Board<br>PO Box 244001<br>DeBoer Building Second Floor<br>301 Brown Springs Road<br>Montgomery, AL 36124-4001<br>UNITED STATES<br><br>Western Institutional Review Board,<br>Inc.<br>3535 Seventh Avenue, SW<br>Olympia, WA 98502<br>UNITED STATES |
| 1028 *        | Dr. David Winslow Hines<br>Jr.                                                  |                           | Dr. Vishnu V. Chundi<br>Dr. Scott P. Neeley<br>Dr. Vijay Veerainder<br>Yeldandi                | Our Lady of Resurrection<br>5645 West Addison Street<br>Chicago, IL 60634<br>UNITED STATES                                                                                                                                                    | Our Lady of the Resurrection<br>Medical Center Institutional Review<br>Board<br>Our Lady of the Resurrection<br>Medical Center<br>Institutional Review Board<br>5645 West Addison Street<br>Chicago, IL 60634<br>UNITED STATES                                                                   |

\* Did not randomize subjects

| <u>Center</u> | <u>Principal Investigator</u> | <u>Co-Investigator(s)</u> | <u>Sub-Investigator(s)</u>                                                                                                                                                                                                    | <u>Address(es)</u>                                                                                                                                                                                             | <u>Institutional Review Board or Ethics Committee Address(es)</u>                                                                  |
|---------------|-------------------------------|---------------------------|-------------------------------------------------------------------------------------------------------------------------------------------------------------------------------------------------------------------------------|----------------------------------------------------------------------------------------------------------------------------------------------------------------------------------------------------------------|------------------------------------------------------------------------------------------------------------------------------------|
| 1031          | Dr. Ioana R. Preston          |                           | Dr. Carolyn M. D'Ambrosio<br>Dr. Nicholas Snowden Hill<br>Dr. Sean O'Reilly<br>Dr. Elaine Purcell<br>Samaan Rafeq<br>Joanne Rhofiry<br>Dr. Kari E. Roberts<br>Dr. Greg L. Schumaker<br>Dr. Archan Shah<br>Dr. Farhan Siddiqui | Pulmonayr Critical Care and Sleep Division<br>Tufts Medical Center<br>800 Washington Street # 257<br>Boston, MA 02111<br>UNITED STATES                                                                         | Tufts Medical Center Institutional Review Board<br>Box 817<br>800 Washington Street<br>Boston, MA 02111<br>UNITED STATES           |
| 1033          | Dr. Harold Clark Standiford   |                           | Dr. Mark Cowan<br>Dr. Graeme Neil Forrest                                                                                                                                                                                     | University of Maryland Medical System<br>22 South Greene Street<br>Baltimore, MD 21201<br>UNITED STATES<br><br>VA Maryland Health Care System<br>10 North Green Street<br>Baltimore, MD 21201<br>UNITED STATES | University of Maryland - Baltimore Institutional Reveiw Board<br>685 West Baltimore Street<br>Baltimore, MD 21201<br>UNITED STATES |

090177e1816ca80c\Approved\Approved On: 06-Oct-2010 15:16

\* Did not randomize subjects



| <u>Center</u> | <u>Principal Investigator</u>  | <u>Co-Investigator(s)</u> | <u>Sub-Investigator(s)</u>                                                                                                                                                                                                                                                         | <u>Address(es)</u>                                                                                 | <u>Institutional Review Board or Ethics Committee Address(es)</u>                                                                                                                                                  |
|---------------|--------------------------------|---------------------------|------------------------------------------------------------------------------------------------------------------------------------------------------------------------------------------------------------------------------------------------------------------------------------|----------------------------------------------------------------------------------------------------|--------------------------------------------------------------------------------------------------------------------------------------------------------------------------------------------------------------------|
| 1036          | Dr. Jeffrey Ross<br>Hammersley |                           | Dr. Amro Y. Al-Astal<br>Dr. Mohamad W. Al-Baghdadi<br>Dr. Ragheb Akram<br>Assaly<br>John F. Blust<br>Andrew P. Fox<br>Dr. Dawn Alita Roberts<br>Hernandez<br>Dr. Dan Emil Olson<br>Dr. Jamey J. Ruiz<br>Dr. Ahmad R. Saltagi<br>Dr. James Campbell<br>Willey<br>Dr. Youngsook Yoon | University Medical Center<br>3000 Arlington Ave<br>Toledo, OH 43614<br>UNITED STATES               | Medical University of Ohio at Toledo<br>Department for Human Research<br>Protections/Institutional Review<br>Board<br>Room 0106<br>3025 Arlington Avenue<br>CCE Building<br>Toledo, OH 43614-2470<br>UNITED STATES |
| 1030 *        | Dr. Boaz A. Markewitz          |                           | Dr. Srinivas B.<br>Chakravarthy<br>Estelle Susan Harris<br>Dr. Robert Patrick                                                                                                                                                                                                      | University of Utah Hospital<br>50 North Medical Drive<br>Salt Lake City, UT 84132<br>UNITED STATES | University of Utah IRB<br>512 RAB<br>75 South 2000 East<br>Salt Lake City, UT 84112<br>UNITED STATES                                                                                                               |

090177e1816ca80c\Approved\Approved On: 06-Oct-2010 15:16

\* Did not randomize subjects

| <u>Center</u> | <u>Principal Investigator</u> | <u>Co-Investigator(s)</u> | <u>Sub-Investigator(s)</u>                                                                                                                                                                                                                                                                                                                                                                                                                                                                                                                                                                                                                                                                                  | <u>Address(es)</u>                                                                                                                                    | <u>Institutional Review Board or Ethics Committee Address(es)</u>                                                                                                           |
|---------------|-------------------------------|---------------------------|-------------------------------------------------------------------------------------------------------------------------------------------------------------------------------------------------------------------------------------------------------------------------------------------------------------------------------------------------------------------------------------------------------------------------------------------------------------------------------------------------------------------------------------------------------------------------------------------------------------------------------------------------------------------------------------------------------------|-------------------------------------------------------------------------------------------------------------------------------------------------------|-----------------------------------------------------------------------------------------------------------------------------------------------------------------------------|
| 1038          | Dr. William Rodriguez-Cintron |                           | Edgardo J. Adono-Fontanez<br>Jose Adorno-Fernandez<br>Dr. Edwin A. Alicea-Colon<br>Dr. Miguel J. Boque-Santiago<br>Zulmari Campos-Santiago<br>Onix Cantres<br>Dr. Jesus R. Casal-Hidalgo<br>Dr. Jose L. Diaz-Pinazo<br>Dr. George P. Fahed-Inigo<br>Dr. Ricardo Fernandez-Gonzalez<br>Rosangela Fernandez-Medero<br>Dr. Carlos R. Garcia-Rodriguez<br>Dr. Glenda Gonzalez Graciela Latalladi-Ortega<br>Dr. Marjery N. Lopez-Acevedo<br>Dr. Brenda L. Loubriel-Rivera<br>Biomaris Medina<br>Dr. Maria E. Ocasio-Tascon<br>Glorimar Santos-Llanos<br>Dr. Jose E. Torres-Palacios<br>Dr. Alfonso Torres-Palacios<br>Maria Del Mar Torres-Perez<br>Maria T. Vega-Martinez<br>Mark A. Vergara<br>Jason L. Willis | San Juan Veterans Affairs Medical Center<br>Pulmonary and Critical Care Medicine 111 East 10 Casia Street<br>San Juan, PR 00921-3201<br>UNITED STATES | Human Studies Subcommittee<br>San Juan Veterans Affairs Medical Center<br>Research and Development Committee<br>10 Casia Street<br>San Juan, PR 00921-3201<br>UNITED STATES |

090177e1816ca80c\Approved\Approved On: 06-Oct-2010 15:16

\* Did not randomize subjects

090177e1816ca80c\Approved\Approved On: 06-Oct-2010 15:16

| <u>Center</u> | <u>Principal Investigator</u> | <u>Co-Investigator(s)</u> | <u>Sub-Investigator(s)</u>                                                                                                                                                                                                                                                                                                                                                                                                                                                                                                                          | <u>Address(es)</u>                                                                                                                                                                                                                                                                                                 | <u>Institutional Review Board or Ethics Committee Address(es)</u>                                                                                                                                                                                         |
|---------------|-------------------------------|---------------------------|-----------------------------------------------------------------------------------------------------------------------------------------------------------------------------------------------------------------------------------------------------------------------------------------------------------------------------------------------------------------------------------------------------------------------------------------------------------------------------------------------------------------------------------------------------|--------------------------------------------------------------------------------------------------------------------------------------------------------------------------------------------------------------------------------------------------------------------------------------------------------------------|-----------------------------------------------------------------------------------------------------------------------------------------------------------------------------------------------------------------------------------------------------------|
| 1048          | Dr. Melvin Lee<br>Morganroth  |                           | Dr. William Minor Lile<br>Bowerfind<br>Dr. Asha Narasimhan<br>Chesnutt<br>Dr. Rhett James<br>Cummings<br>Mary Alice Day<br>Christine Ebright<br>Dr. David Hotchkin<br>Dr. Marc Allan Jacobs<br>Michael L. Johnston<br>Dr. John Ford Keppel<br>Kim Lamorticella<br>Dr. Michael John Lefor<br>Dr. Louis Samuels Libby<br>Jane Manning<br>Dr. Richard John<br>Maunder<br>Jackie Morganroth<br>Dr. James Randolph<br>Patterson<br>Dr. Thomas Hyland<br>Schaumberg<br>Dr. Michael David<br>Skokan<br>Dr. Wayne M. Strauss<br>Dr. Karen Joan<br>Wesenberg | Providence Portland Medical<br>Center<br>4805 North East Glisan<br>Portland, OR 97213<br>UNITED STATES<br><br>The Oregon Clinic, P.C.<br>Suite 200<br>1111 NE 99th Avenue<br>Portland, OR 97220<br>UNITED STATES<br><br>Vibra Specialty Hospital<br>10300 NE Hancock Street<br>Portland, OR 97220<br>UNITED STATES | Providence Health System Institutional<br>Review Board<br>Building A Third Floor<br>5251 NE Glisan<br>Portland, OR 97213<br>UNITED STATES<br><br>Western Institutional Review Board,<br>Inc.<br>3535 Seventh Ave SW<br>Olympia, WA 98508<br>UNITED STATES |
| 1042          | Dr. Domenick J. Reina         |                           | Dr. Margarita R. Cancio<br>Dr. Keith W. Chandler<br>MD<br>Dr. Dorece G. Norris<br>Dr. Jose Eduardo Perez<br>Dr. Carlos J. Rozas MD<br>Dr. Mark Anthony Smith<br>MD<br>Bonnie F. Tiemann<br>Dr. Scott S. Ubillos                                                                                                                                                                                                                                                                                                                                     | St. Joseph's Hospital<br>3001 West Dr. Martin Luther<br>King, Jr. Blvd<br>Tampa, FL 33607<br>UNITED STATES                                                                                                                                                                                                         | St. Joseph's Hospital<br>Institutional Review Board<br>3001 West Dr. Martin Luther King,<br>Jr. Boulevard<br>Tampa, FL 33607<br>UNITED STATES                                                                                                             |

\* Did not randomize subjects

| <u>Center</u> | <u>Principal Investigator</u> | <u>Co-Investigator(s)</u> | <u>Sub-Investigator(s)</u>                                                                                                                    | <u>Address(es)</u>                                                                                                                                                                                         | <u>Institutional Review Board or Ethics Committee Address(es)</u>                                                                   |
|---------------|-------------------------------|---------------------------|-----------------------------------------------------------------------------------------------------------------------------------------------|------------------------------------------------------------------------------------------------------------------------------------------------------------------------------------------------------------|-------------------------------------------------------------------------------------------------------------------------------------|
| 1050 *        | Dr. Cordelia V. Sharma        |                           | Dr. Arnold W. Berlin<br>Dr. Randall P. Owen<br>Dr. Thanjavur S. Ravikumar                                                                     | Montifore Medical Center<br>111 East 210th Street<br>Bronx, NY 10467<br>UNITED STATES                                                                                                                      | Montefiore Medical Center<br>Office of Research and Sponsored Programs<br>111 East 210th Street<br>Bronx, NY 10467<br>UNITED STATES |
| 1051          | Dr. Michael Steven Sherman    |                           | Karim Djekidel<br>anas hadeh<br>Jeffrey Hoag<br>Denise Lai<br>Dr. Herbert Patrick<br>Dr. Siva Kumar<br>Ramachandran<br>Dr. Edward S. Schulman | Hahnemann University Hospital<br>Broad and Vine Streets<br>Philadelphia, PA 19102<br>UNITED STATES                                                                                                         | Western Institutional Review Board, Inc.<br>3535 Seventh Avenue SW<br>Olympia, WA 98502-5010<br>UNITED STATES                       |
| 1039 *        | Dr. Priscilla Bayani Sioson   |                           | Dr. Julie T. Antique<br>Dr. Debra Lee Rainey                                                                                                  | Jackson-Madison County General Hospital<br>708 West Forest Avenue<br>Jackson, TN 38301<br>UNITED STATES<br><br>West Tennessee Transitional Care<br>670 Skyline Drive<br>Jackson, TN 38301<br>UNITED STATES | Jackson-Madison County General Hospital IRB<br>708 West Forest Avenue<br>Jackson, TN 38301<br>UNITED STATES                         |

090177e1816ca80c\Approved\Approved On: 06-Oct-2010 15:16

\* Did not randomize subjects

| <u>Center</u> | <u>Principal Investigator</u>                                                                                                              | <u>Co-Investigator(s)</u> | <u>Sub-Investigator(s)</u>                                                                                                                                                                                                                                                                                                                             | <u>Address(es)</u>                                                                                                                    | <u>Institutional Review Board or Ethics Committee Address(es)</u>                                                                                                                                        |
|---------------|--------------------------------------------------------------------------------------------------------------------------------------------|---------------------------|--------------------------------------------------------------------------------------------------------------------------------------------------------------------------------------------------------------------------------------------------------------------------------------------------------------------------------------------------------|---------------------------------------------------------------------------------------------------------------------------------------|----------------------------------------------------------------------------------------------------------------------------------------------------------------------------------------------------------|
| 1040          | Daniel J. Naughton<br>Dr. Aaron Michael Scifres (Previous PI)<br>Dr. Carl A. Freeman (Previous PI)<br>Dr. Lonnie Warren Frei (Previous PI) |                           | Dr. Jeffrey Bailey<br>Craig Dedert<br>Mr. John A. Evans<br>Dr. Carl A. Freeman<br>Brent Ibata<br>Shannon G. Lehner<br>Kathryn K. Lindsay<br>Kevin Mahoney<br>Dr. Sapoori Manshahi<br>Dr. George Marion Matuschak<br>Dr. Nahel N. Saied<br>Anna Schmidt<br>Dr. Aaron Michael Scifres<br>Jane E. Tenquist<br>Dr. Catherine Marie Wittgen<br>Dr. Hui Yuan | Saint Louis University<br>3635 Vista Avenue at Grand Boulevard<br>St. Louis, MO 63110<br>UNITED STATES                                | Saint Louis University Hospital<br>Biomedical Institutional Review Board<br>3556 Caroline Street<br>Room 110<br>St. Louis, MO 63104<br>UNITED STATES                                                     |
| 1046          | Dr. Robert Curtis Hyzy                                                                                                                     |                           | Dr. Robert H. Bartlett<br>Dr. Ronald E. Dechert<br>Dr. Christopher L. Fraley<br>Dr. Steven Eldon Gay<br>Dr. Andrew L. Rosenberg                                                                                                                                                                                                                        | University of Michigan Health System<br>Adult Hospital<br>1500 East Medical Center Drive<br>Ann Arbor, MI 48109-0331<br>UNITED STATES | University of Michigan Medical School<br>Institutional Review Board for Human Subjects Research<br>4558 Kresge Medical Research Building One<br>200 Zina Pitcher<br>Ann Arbor, MI 48109<br>UNITED STATES |

090177e1816ca80c\Approved\Approved On: 06-Oct-2010 15:16

\* Did not randomize subjects

090177e1816ca80c\Approved\Approved On: 06-Oct-2010 15:16

| <u>Center</u> | <u>Principal Investigator</u> | <u>Co-Investigator(s)</u> | <u>Sub-Investigator(s)</u>                                                                                                    | <u>Address(es)</u>                                                                                                                                                                                                                                  | <u>Institutional Review Board or Ethics Committee Address(es)</u>                                                                                                                          |
|---------------|-------------------------------|---------------------------|-------------------------------------------------------------------------------------------------------------------------------|-----------------------------------------------------------------------------------------------------------------------------------------------------------------------------------------------------------------------------------------------------|--------------------------------------------------------------------------------------------------------------------------------------------------------------------------------------------|
| 1047          | Dr. John Edward Mazuski       |                           | Dr. Timothy George Buchman<br>Dr. Craig M. Coopersmith<br>Steven E. Finkelstein<br>Dr. Eric Jacobsohn<br>Dr. Douglas Schuerer | The Barnes-Jewish Hospital<br>One Barnes Jewish Hospital Plaza<br>St. Louis, MO 63110<br>UNITED STATES<br><br>Washington University School of Medicine<br>Campus Box 8109<br>660 South Euclid Avenue<br>Saint Louis, MO 63110-1010<br>UNITED STATES | Washington University Medical Center IRB<br>Washington University Medical Center<br>Human Studies Committee<br>660 South Euclid Avenue<br>Box 8089<br>St. Louis, MO 63110<br>UNITED STATES |
| 1052          | Dr. William Thomas Dickey Jr. |                           | Dr. David Matthew Cantrell<br>Dr. Michael Patrick Witt                                                                        | BAYLOR MEDICAL CENTER<br>AT IRVING CLINICAL RESEARCH<br>1901 NORTH MACARTHUR BOULEVARD<br>IRVING, TX 75061<br>UNITED STATES                                                                                                                         | Baylor Research Institute<br>Institutional Review Board<br>Suite 125<br>3434 Live Oak<br>Dallas, TX 75204<br>UNITED STATES                                                                 |
| 1007          | Dr. Bruce C. Friedman         |                           | Dr. S M Abu Zaheed Hassan<br>Dr. Robert F. Mullins<br>Dr. Joseph R. Shaver<br>Dr. Amy McElroy Sprague                         | Doctors Hospital<br>3651 Wheeler Road<br>Augusta, GA 30909<br>UNITED STATES<br><br>Joseph M. Still Research Foundation, Inc.<br>4A George C. Wilson Court<br>Augusta, GA 30909<br>UNITED STATES                                                     | Doctors Hospital Augusta<br>Institutional Review Board<br>3651 Wheeler Road<br>Augusta, GA 30909<br>UNITED STATES                                                                          |

\* Did not randomize subjects

| <u>Center</u> | <u>Principal Investigator</u>                                                        | <u>Co-Investigator(s)</u> | <u>Sub-Investigator(s)</u>                                                                                                                                                                                                                                                                                 | <u>Address(es)</u>                                                                                                                                                                                                                       | <u>Institutional Review Board or Ethics Committee Address(es)</u>                                                                      |
|---------------|--------------------------------------------------------------------------------------|---------------------------|------------------------------------------------------------------------------------------------------------------------------------------------------------------------------------------------------------------------------------------------------------------------------------------------------------|------------------------------------------------------------------------------------------------------------------------------------------------------------------------------------------------------------------------------------------|----------------------------------------------------------------------------------------------------------------------------------------|
| 1008          | Dr. Azmi Draw<br>(Previous PI)<br>Dr. Raul Nakamatsu<br>Dr. Subin Jain (Previous PI) |                           | Mary Beth Allen<br>Dr. Marty Allen<br>Amirali Ali Amjadi<br>Dr. Forest W. Arnold<br>Dr. Azmi Draw<br>Uchenna Ezike<br>Dr. Juan J. Guardiola<br>Rama Kapoor<br>Dr. Pauline A. Lett<br>Dr. Maricar F. Malinis<br>Paula Peyrani<br>Dr. Julio A. Ramirez<br>Denise Rueff<br>Ginny Sciortino<br>Inemesit Umoren | University of Louisville<br>Division of Infectious Diseases<br>Suite 380<br>501 East Broadway<br>Louisville, KY 40202<br>UNITED STATES<br><br>Veteran Affairs Medical Center<br>800 Zorn Avenue<br>Louisville, KY 40206<br>UNITED STATES | Veterans Affairs Medical Center<br>Human Studies Subcommittee<br>Suite 151<br>800 Zorn Avenue<br>Louisville, KY 40206<br>UNITED STATES |

090177e1816ca80c\Approved\Approved On: 06-Oct-2010 15:16

\* Did not randomize subjects

090177e1816ca80c\Approved\Approved On: 06-Oct-2010 15:16

| <u>Center</u> | <u>Principal Investigator</u> | <u>Co-Investigator(s)</u> | <u>Sub-Investigator(s)</u>                                                                                                                                                                                                                                                                                                                                                                                                                                                                                                                                          | <u>Address(es)</u>                                                                                                                                                                                    | <u>Institutional Review Board or Ethics Committee Address(es)</u>                                                                                                                                            |
|---------------|-------------------------------|---------------------------|---------------------------------------------------------------------------------------------------------------------------------------------------------------------------------------------------------------------------------------------------------------------------------------------------------------------------------------------------------------------------------------------------------------------------------------------------------------------------------------------------------------------------------------------------------------------|-------------------------------------------------------------------------------------------------------------------------------------------------------------------------------------------------------|--------------------------------------------------------------------------------------------------------------------------------------------------------------------------------------------------------------|
| 1012          | Dr. Paul Anthony Kearney Jr.  |                           | Ms. Marietta Barton-Baxter<br>Stephanie Baugh<br>Dr. Rolando R. Berger<br>Dr. Andrew Bernard<br>Anthony Bottiggi<br>Dr. Bernard Boulanger<br>Dr. Phillip K. Chang<br>Dr. Aaron M. Cook<br>Dr. Jeffrey P. Coughenour<br>Nannette Freeman<br>Rebecca Geyer<br>Tracy Jackson<br>Brittany Kaiser<br>Joy Kimbrough<br>Christie Merrill<br>Lauren Morrow<br>Levi D. Procter<br>Julia Reed<br>Ms. Anna K. Rockich<br>Danielle Sager<br>Rebecca Shelton<br>Matthew E. Simpson<br>Pam Stafford<br>Lauren Wiggington-White<br>P. Shane Winstead<br>Marta Wood<br>Bryan Yankey | University of Kentucky<br>800 Rose Street<br>Lexington, KY 40536<br>UNITED STATES<br><br>University of Kentucky Chandler<br>Medical Center<br>800 Rose Street<br>Lexington, KY 40536<br>UNITED STATES | University of Kentucky Hospital<br>University of Kentucky<br>Hospital/Medical Institutional<br>Review Board/Office of Research<br>Integrity<br>315 Kinkead Hall<br>Lexington, KY 40506-0057<br>UNITED STATES |
| 1013          | Dr. William Kien-ki Lau       |                           | Dr. Stuart Sugihara<br>Renee Tichy                                                                                                                                                                                                                                                                                                                                                                                                                                                                                                                                  | Kuakini Medical Center<br>347 North Kuakini Street<br>Honolulu, HI 96817<br>UNITED STATES                                                                                                             | Kuakini Research and Institutional<br>Review Committee<br>347 North Kuakini Street<br>Honolulu, HI 96817<br>UNITED STATES                                                                                    |

\* Did not randomize subjects



| <u>Center</u> | <u>Principal Investigator</u>     | <u>Co-Investigator(s)</u> | <u>Sub-Investigator(s)</u>                                                                                                             | <u>Address(es)</u>                                                                                                                                                                                                                                                                                                                                                                                                                                  | <u>Institutional Review Board or Ethics Committee Address(es)</u>                                                                                              |
|---------------|-----------------------------------|---------------------------|----------------------------------------------------------------------------------------------------------------------------------------|-----------------------------------------------------------------------------------------------------------------------------------------------------------------------------------------------------------------------------------------------------------------------------------------------------------------------------------------------------------------------------------------------------------------------------------------------------|----------------------------------------------------------------------------------------------------------------------------------------------------------------|
| 1045          | Dr. Joseph Harrison<br>Patton Jr. |                           | Dr. Craig F Copeland<br>Dr. Noreen Durrani<br>Dr. Erin O. Field<br>Dr. Harriette Mathilda Horst<br>Dr. Mike McCann<br>Dr. Usman Waheed | Henry Ford Health System<br>2799 West Grand Boulevard<br>Detroit, MI 48202<br>UNITED STATES                                                                                                                                                                                                                                                                                                                                                         | Henry Ford Health System,<br>Institutional Review Board<br>CFP-Basement 046<br>2799 West Grand Boulevard<br>Detroit, MI 48202<br>UNITED STATES                 |
| 1044          | Dr. Joann Bennett                 |                           | Dr. Aristides P. Assimacopoulos<br>Susan E. Baumgart-Weaver<br>Dr. Rizan A. Hajal<br>Dr. Brian T. Hurley<br>Julie M. Warren-Kittlesrud | Avera Downtown Center<br>Suite 117<br>300 North Dakota Avenue<br>Sioux Falls, SD 57104<br>UNITED STATES<br><br>Avera McKennan Hospital<br>Box 5045<br>800 East 21st Street<br>Sioux Falls, SD 57117-5045<br>UNITED STATES<br><br>Avera Research Institute<br>2020 South Norton Avenue<br>Sioux Falls, SD 57105<br>UNITED STATES<br><br>Pulmonary Assoc./Avera Health<br>Suite 500<br>911 East 20th Street<br>Sioux Falls, SD 57105<br>UNITED STATES | Avera Institutional Review Board<br>3900 Avera Drive<br>Sioux Falls, SD 57108<br>UNITED STATES                                                                 |
| 1068 *        | Dr. Geetika Nisha Sood            |                           | Dr. Bartholomew Raymond Bono<br>Dr. Jorge Ignacio Mora<br>Dr. Jerry Marc Zuckerman                                                     | ALBERT EINSTEIN MEDICAL CENTER<br>5501 OLD YORK ROAD<br>PHILADELPHIA, PA 19141<br>UNITED STATES                                                                                                                                                                                                                                                                                                                                                     | Albert Einstein Healthcare Network<br>Institutional Review Board<br>Korman Building, Room 100<br>5501 Old York Road<br>Philadelphia, PA 19141<br>UNITED STATES |

090177e1816ca80c\Approved\Approved On: 06-Oct-2010 15:16

\* Did not randomize subjects

| <u>Center</u> | <u>Principal Investigator</u>                                     | <u>Co-Investigator(s)</u> | <u>Sub-Investigator(s)</u>                                                                                                                                                                                                                                                               | <u>Address(es)</u>                                                                                       | <u>Institutional Review Board or Ethics Committee Address(es)</u>                                                                                                                                                                 |
|---------------|-------------------------------------------------------------------|---------------------------|------------------------------------------------------------------------------------------------------------------------------------------------------------------------------------------------------------------------------------------------------------------------------------------|----------------------------------------------------------------------------------------------------------|-----------------------------------------------------------------------------------------------------------------------------------------------------------------------------------------------------------------------------------|
| 1070          | Dr. Jorge I. Cue<br>Dr. Robert George<br>Martindale (Previous PI) |                           | Dr. Gina L. Adrales<br>Mary M. Bannan<br>Dr. Colville H. B. Ferdinand<br>Dr. Thomas R. Gadacz<br>Dr. Michael L. Hawkins<br>Dr. David M. Killough<br>Dr. Bruce Vischer<br>Macfadyen Jr.<br>Dr. John D. Mellinger<br>Mary Anne Park<br>Brenda B. Rosson<br>Carol A. Smith<br>Dayna Swinson | Medical College of Georgia<br>1120 15th Street<br>Augusta, GA 30912<br>UNITED STATES                     | Human Assurance Committee<br>Medical College of Georgia<br>CJ-2103<br>1120 15th Street<br>Augusta, GA 30912<br>UNITED STATES                                                                                                      |
| 1072 *        | Dr. Robert Michael Aris                                           |                           | Dr. Shannon Stewart<br>Carson<br>Dr. Raymond D. Coakley<br>Heather P. Krumnacher<br>Dr. Isabel P. Neuringer                                                                                                                                                                              | University of North Carolina<br>Hospitals<br>101 Manning Drive<br>Chapel Hill, NC 27514<br>UNITED STATES | The University of North Carolina at<br>Chapel Hill<br>Office of Human Research Ethics<br>Biomedical Institutional Review<br>Board<br>Medical School Building 52<br>Campus Box 7097<br>Chapel Hill, NC 27599-7097<br>UNITED STATES |

090177e1816ca80c\Approved\Approved On: 06-Oct-2010 15:16

\* Did not randomize subjects

090177e1816ca80c\Approved\Approved On: 06-Oct-2010 15:16

| <u>Center</u> | <u>Principal Investigator</u> | <u>Co-Investigator(s)</u> | <u>Sub-Investigator(s)</u>                                                                              | <u>Address(es)</u>                                                                                                                                                                                                                                                                                                              | <u>Institutional Review Board or Ethics Committee Address(es)</u>                                                               |
|---------------|-------------------------------|---------------------------|---------------------------------------------------------------------------------------------------------|---------------------------------------------------------------------------------------------------------------------------------------------------------------------------------------------------------------------------------------------------------------------------------------------------------------------------------|---------------------------------------------------------------------------------------------------------------------------------|
| 1073          | Rod L. Elliott-Mullens        |                           | Dr. Guido J. Calderon                                                                                   | <p>Central Texas Medical Center<br/>1301 Wonder World Drive<br/>San Marcos, TX 78666<br/>UNITED STATES</p> <p>Central Texas Pulmonary<br/>Suite 308<br/>1305 Wonder World Drive<br/>San Marcos, TX 78666<br/>UNITED STATES</p> <p>TEAM Research of Sequin<br/>1117 East Court Street<br/>Sequin, TX 78155<br/>UNITED STATES</p> | <p>Western Institutional Review Board,<br/>Inc.<br/>3535 7th Avenue, Southwest<br/>Olympia, WA 98502-5010<br/>UNITED STATES</p> |
| 1075          | Dr. David C. Kaufman          |                           | <p>Dr. Michael J. Apostolakos<br/>Stephen A. Bean<br/>Dr. Joseph W. Dooley<br/>Dr. Carolyn E. Jones</p> | <p>University of Rochester Medical Center/Strong Memorial Hospital<br/>601 Elmwood Avenue<br/>Rochester, NY 14642<br/>UNITED STATES</p>                                                                                                                                                                                         | <p>Western Institutional Review Board,<br/>Inc.<br/>3535 Seventh Avenue, SW<br/>Olympia, WA 98502<br/>UNITED STATES</p>         |
| 1078 *        | Dr. Miren A. Schinco-Schaffer |                           | <p>Dr. Margaret Mary Griffen<br/>Dr. Andrew Kerwin</p>                                                  | <p>Faculty Clinic<br/>653 West 8th Street<br/>Jackson, FL 32209<br/>UNITED STATES</p> <p>University of Florida Health Science Center-Jacksonville<br/>SHANDS Jacksonville Medical Center<br/>655 West 8th St.<br/>Jacksonville, FL 32209<br/>UNITED STATES</p>                                                                  | <p>Western Institutional Review Board,<br/>Inc.<br/>3535 Seventh Avenue, SW<br/>Olympia, WA 98502<br/>UNITED STATES</p>         |

\* Did not randomize subjects

| <u>Center</u> | <u>Principal Investigator</u> | <u>Co-Investigator(s)</u> | <u>Sub-Investigator(s)</u>                                                                                                                                             | <u>Address(es)</u>                                                                                                                                                                                                                                                                                                                                         | <u>Institutional Review Board or Ethics Committee Address(es)</u>                                                                                                           |
|---------------|-------------------------------|---------------------------|------------------------------------------------------------------------------------------------------------------------------------------------------------------------|------------------------------------------------------------------------------------------------------------------------------------------------------------------------------------------------------------------------------------------------------------------------------------------------------------------------------------------------------------|-----------------------------------------------------------------------------------------------------------------------------------------------------------------------------|
| 1084 *        | Dr. Paul Joseph Scheinberg    |                           | Dr. Juan C. Armstrong<br>Dr. Kathryn M. McMinn                                                                                                                         | Atlanta Pulmonary Group, LLC<br>Suite 390<br>5667 Peachtree Dunwoody Rd.<br>Atlanta, GA 30342<br>UNITED STATES<br><br>St. Joseph's Hospital of Atlanta<br>5665 Peachtree Dunwoody Road<br>Atlanta, GA 30342<br>UNITED STATES                                                                                                                               | Saint Joseph's Hospital of Atlanta<br>Institutional Review Board<br>Suite 685<br>5673 Peachtree Dunwoody Road<br>Atlanta, GA 30342<br>UNITED STATES                         |
| 1085 *        | Dr. Paul Peniston Cook        |                           | Dr. Titu Das<br>Dr. Carlos Guerra<br>Dr. Thomas Michael Kerkering<br>Dr. Ricardo A. Maldonado<br>Madhvi Rana<br>Dr. Kashif Raza<br>Dr. Dawd Said Siraj<br>Tammy Worden | Brody School of Medicine at East Carolina University<br>Doctor's Park 6A<br>Greenville, NC 27834<br>UNITED STATES<br><br>Brody School of Medicine at East Carolina University (ECU)<br>600 Moye Boulevard<br>Greenville, NC 27834<br>UNITED STATES<br><br>Pitt County Memorial Hospital<br>2100 Stantonsburg Road<br>Greenville, NC 27834<br>UNITED STATES | University and Medical Center IRB<br>East Carolina University<br>LSB 104<br>Ed Warren Life Sciences Building<br>600 Moye Boulevard<br>Greenville, NC 27834<br>UNITED STATES |

090177e1816ca80c\Approved\Approved On: 06-Oct-2010 15:16

\* Did not randomize subjects

| <u>Center</u> | <u>Principal Investigator</u>                                                                         | <u>Co-Investigator(s)</u> | <u>Sub-Investigator(s)</u> | <u>Address(es)</u>                                                                                                                                                                                                                                                                                                                                                  | <u>Institutional Review Board or Ethics Committee Address(es)</u>                                                                                   |
|---------------|-------------------------------------------------------------------------------------------------------|---------------------------|----------------------------|---------------------------------------------------------------------------------------------------------------------------------------------------------------------------------------------------------------------------------------------------------------------------------------------------------------------------------------------------------------------|-----------------------------------------------------------------------------------------------------------------------------------------------------|
| 1087          | Dr. Graciella Soto<br>(Previous PI)<br>Dr. Hidenobu Shigemitsu<br>Dr. Tony N. Hodges<br>(Previous PI) |                           | Dr. Adupa P. Rao           | LAC/USC Medical Center<br>1200 North State Street<br>Los Angeles, CA 90033<br>UNITED STATES<br><br>USC University Hospital, USC<br>Cardiothoracic Transplant<br>Program<br>Suite 4300<br>1520 San Pablo Street<br>Los Angeles, CA 90033<br>UNITED STATES                                                                                                            | Institutional Review Board<br>LAC/USC Medical Center<br>Intern's residence Dorm #425<br>2020 Zonal Avenue<br>Los Angeles, CA 90033<br>UNITED STATES |
| 1089          | Dr. Walid Fayed Khayr                                                                                 |                           |                            | Veterans Affairs Medical Center<br>North Chicago<br>3001 Green Bay Road<br>North Chicago, IL 60064<br>UNITED STATES                                                                                                                                                                                                                                                 | Human Studies Subcommittee<br>5th Avenue and Roosevelt Road<br>Hines, IL 60141<br>UNITED STATES                                                     |
| 1090 *        | Dr. Robert Lee Swords                                                                                 |                           |                            | St. John's Clinic-Infectious<br>Disease Associates<br>Suite 2955<br>1900 South National Avenue<br>Springfield, MO 65804<br>UNITED STATES<br><br>St. John's Medical Research<br>3231 South National Avenue<br>Springfield, MO 65807<br>UNITED STATES<br><br>St. John's Regional Health Center<br>1235 East Cherokee Street<br>Springfield, MO 65804<br>UNITED STATES | St. John's Institutional Review Board<br>1235 East Cherokee Street<br>Springfield, MO 65804<br>UNITED STATES                                        |

090177e1816ca80c\Approved\Approved On: 06-Oct-2010 15:16

\* Did not randomize subjects

| <u>Center</u> | <u>Principal Investigator</u>                                      | <u>Co-Investigator(s)</u> | <u>Sub-Investigator(s)</u>                                                                                                                                                                                          | <u>Address(es)</u>                                                                                                                                                                                                                                            | <u>Institutional Review Board or Ethics Committee Address(es)</u>                                                             |
|---------------|--------------------------------------------------------------------|---------------------------|---------------------------------------------------------------------------------------------------------------------------------------------------------------------------------------------------------------------|---------------------------------------------------------------------------------------------------------------------------------------------------------------------------------------------------------------------------------------------------------------|-------------------------------------------------------------------------------------------------------------------------------|
| 1134          | Dr. Jerome F. Levine                                               |                           | Dr. Bindu Balani<br>Dr. Steven A. Blau<br>Dr. Christina Emanuela Cicogna<br>Samit Desai<br>Dr. Peter Alan Gross<br>Ossama I. Ikladios<br>Dr. Emanuele Andrew Santomauro<br>Dr. Rani Sebti<br>Dr. Steven Jay Sperber | Center for Infectious Diseases<br>Hackensack University Medical Center<br>Suite 507<br>20 Prospect Avenue<br>Hackensack, NJ 07601<br>UNITED STATES<br><br>Hackensack University Medical Center<br>30 Prospect Avenue<br>Hackensack, NJ 07601<br>UNITED STATES | Western Institutional Review Board, Inc.<br>WIRB<br>3535 Seventh Avenue, Southwest<br>Olympia, WA 98502-5010<br>UNITED STATES |
| 1137 *        | Dr. Kevin N. Foster                                                |                           | Dr. Tammy R. Kopelman                                                                                                                                                                                               | MARICOPA MEDICAL CENTER<br>2601 EAST ROOSEVELT<br>PHOENIX, AZ 85008<br>UNITED STATES                                                                                                                                                                          | Maricopa Integrated Health System<br>Institutional Review Board<br>2601 East Roosevelt<br>Phoenix, AZ 85008<br>UNITED STATES  |
| 1138 *        | Dr. Dennis Eugene Amundson (Previous PI)<br>Dr. John Scott Parrish |                           | Dr. Mary F. Bavaro<br>Dr. Matthew E. Boland                                                                                                                                                                         | Naval Medical Center San Diego<br>34800 Bob Wilson Drive<br>San Diego, CA 92134<br>UNITED STATES                                                                                                                                                              | Naval Medical Center San Diego<br>Suite 5<br>34800 Bob Wilson Drive<br>San Diego, CA 92134-5000<br>UNITED STATES              |
| 1144          | Dr. Paul E. Bankey                                                 |                           | Dr. Julius D. Cheng                                                                                                                                                                                                 | University of Rochester Medical Center Strong Memorial Hospital<br>601 Elmwood Ave<br>Rochester, NY 14642-8410<br>UNITED STATES                                                                                                                               | Western Institutional Review Board, Inc.<br>3535 Seventh Avenue, SW<br>Olympia, WA 98502<br>UNITED STATES                     |

090177e1816ca80c\Approved\Approved On: 06-Oct-2010 15:16

\* Did not randomize subjects

| <u>Center</u> | <u>Principal Investigator</u> | <u>Co-Investigator(s)</u> | <u>Sub-Investigator(s)</u>                                                                                                                                                                                                                                                                                                                                                                                                                                                                                                                                                                                                                                                                              | <u>Address(es)</u>                                                                                                    | <u>Institutional Review Board or Ethics Committee Address(es)</u>                                                                                      |
|---------------|-------------------------------|---------------------------|---------------------------------------------------------------------------------------------------------------------------------------------------------------------------------------------------------------------------------------------------------------------------------------------------------------------------------------------------------------------------------------------------------------------------------------------------------------------------------------------------------------------------------------------------------------------------------------------------------------------------------------------------------------------------------------------------------|-----------------------------------------------------------------------------------------------------------------------|--------------------------------------------------------------------------------------------------------------------------------------------------------|
| 1145          | Dr. John Guy<br>Mastronarde   |                           | Imad Joseph Bout-Akl<br>Scott Kenneth Aberegg<br>Dr. Naeem A. Ali<br>Dr. James Norman Allen Jr.<br>Beth Besecker<br>Dr. Nitin Yogendra Bhatt<br>Emily Jane Brawner<br>Benjamin Bringardner<br>Aaron Scott Bruns<br>Dr. Elliott David Crouser<br>Kiran Kumar Devulapally<br>Dr. Philip Tomas Diaz<br>Leroy Essig<br>Matthew Exline<br>Michael Ezzie<br>Robert P. Fudge<br>Michael B Green<br>Bradley R Harrold<br>Dr. Stephen Hoffmann<br>Daniel Vassilev Ilchev<br>Steven Kadiev<br>Rami Khayat<br>Stephen E. Kirkby<br>Dr. Maria R. Lucarelli<br>David R. Nunley<br>James M O'Brien<br>Jonathan Parsons<br>Troy A Schaffernocker<br>Dr. Leanne Kay Strack<br>Martin A Valdivia-Arenas<br>Karen L. Wood | The Ohio State University<br>Medical Center<br>410 West Tenth Avenue<br>Columbus, OH 43210<br>UNITED STATES           | Western Institutional Review Board<br>3535 Seventh Avenue, SW<br>Olympia, WA 98502-5010<br>UNITED STATES                                               |
| 1146 *        | Dr. Steven D. Tennenberg      |                           | Dr. Walter A. Salwen                                                                                                                                                                                                                                                                                                                                                                                                                                                                                                                                                                                                                                                                                    | John D. Dingell VA Medical Center<br>Department of Surgery (11S)<br>4646 John R<br>Detroit, MI 48201<br>UNITED STATES | Wayne State University<br>Human Investigation Committee<br>University Health Center, 6G<br>4201 St. Antoine Blvd<br>Detroit, MI 48201<br>UNITED STATES |

090177e1816ca80c\Approved\Approved On: 06-Oct-2010 15:16

\* Did not randomize subjects

090177e1816ca80c\Approved\Approved On: 06-Oct-2010 15:16

| <u>Center</u> | <u>Principal Investigator</u> | <u>Co-Investigator(s)</u> | <u>Sub-Investigator(s)</u>                                                                                                                                    | <u>Address(es)</u>                                                                                                                                                                                                                                                                                                                                                                                                                                               | <u>Institutional Review Board or Ethics Committee Address(es)</u>                                                                                                                 |
|---------------|-------------------------------|---------------------------|---------------------------------------------------------------------------------------------------------------------------------------------------------------|------------------------------------------------------------------------------------------------------------------------------------------------------------------------------------------------------------------------------------------------------------------------------------------------------------------------------------------------------------------------------------------------------------------------------------------------------------------|-----------------------------------------------------------------------------------------------------------------------------------------------------------------------------------|
| 1147          | Dr. Joseph M. Gastaldo        |                           | Dr. Ian McNicoll Baird<br>Dr. Simrit K. Bhullar<br>Joshua E. Bitter<br>Dr. Edward Michael Cordasco Jr.<br>Barbara Danenbergs<br>Caleb Mackey<br>Brian R. Zeno | Remington-Davis, Inc.<br>Suite 106A<br>1335 Dublin Road<br>Columbus, OH 43215<br>UNITED STATES<br><br>Riverside Infections Consultants<br>Suite 3020<br>3555 Olentangy River Road<br>Columbus, OH 43214<br>UNITED STATES<br><br>Riverside Methodist Hospital<br>3535 Olentangy River Road<br>Columbus, OH 43214<br>UNITED STATES<br><br>Riverside Pulmonary Associates,<br>Inc.<br>Suite 201<br>3535 Olentangy River Road<br>Columbus, OH 43214<br>UNITED STATES | Riverside Methodist Hospital<br>Grady Memorial Hospital,<br>Institutional Review Board<br>Suite 404<br>3545 Olentangy River Road<br>Columbus, OH 43214<br>UNITED STATES           |
| 1148          | Dr. Stephen E. Olvey          |                           | Dr. Enrique Ginzburg                                                                                                                                          | University of Miami School of<br>Medicine/Jackson Memorial<br>Hospital<br>1601 NW 12th Avenue<br>Miami, FL 33136<br>UNITED STATES                                                                                                                                                                                                                                                                                                                                | University of Miami, School Of<br>Medicine<br>Human Subjects Research Office<br>Tenth Floor, Suite 1000 (M-809)<br>1500 Northwest 12th Avenue<br>Miami, FL 33136<br>UNITED STATES |

\* Did not randomize subjects



| <u>Center</u> | <u>Principal Investigator</u> | <u>Co-Investigator(s)</u> | <u>Sub-Investigator(s)</u>                                                                                                                                           | <u>Address(es)</u>                                                                                           | <u>Institutional Review Board or Ethics Committee Address(es)</u>                                                                                   |
|---------------|-------------------------------|---------------------------|----------------------------------------------------------------------------------------------------------------------------------------------------------------------|--------------------------------------------------------------------------------------------------------------|-----------------------------------------------------------------------------------------------------------------------------------------------------|
| 1156          | Dr. Marianne Eva Cinat        |                           | Dr. Cristobal Barrios<br>Mr. Carlos Chavez<br>Dr. Matthew O. Dolich<br>Lorene Kong<br>Dr. Christopher T. Lane<br>Dr. Michael Edward Lekawa<br>Dr. Chirag Vipin Patel | University of California Irvine<br>Medical Center<br>101 The City Drive<br>Orange, CA 92868<br>UNITED STATES | University of California, Irvine<br>Office of Research Administration<br>Suite 300<br>4199 Campus Drive<br>Irvine, CA 92697-7600<br>UNITED STATES   |
| 1157          | Dr. Liziamma George           |                           | Dr. Teena Abraham<br>Dr. Ayman Asaad Bishay<br>Dr. Frew H. Gebreab                                                                                                   | New York Methodist Hospital<br>506 Sixth Street<br>Brooklyn, NY 11215<br>UNITED STATES                       | New York Methodist Hospital<br>Institutional Review Committee<br>506 Sixth Street<br>Brooklyn, NY 11215<br>UNITED STATES                            |
| 1160 *        | Dr. Larry I. Emdur            |                           | Dr. Gang Bao<br>Dr. Parvathi<br>Tiruvilumala                                                                                                                         | Alvarado Hospital Medical<br>Center<br>6655 Alvarado Rd.<br>San Diego, CA 92120<br>UNITED STATES             | Alvarado Hospital Institutional<br>Review Board<br>6655 Alvarado Road<br>San Diego, CA 92120<br>UNITED STATES                                       |
| 1162          | Dr. Ronald L. Ciubotaru       |                           | Dr. Darryl L. Adler<br>Nur-E-Ain Mirza<br>Anita Mimi Nacario<br>Mervyn Richardson<br>Dr. Mihal Smina<br>Dr. Richard L. Stumacher                                     | St. Barnabas Hospital<br>4422 3rd Ave<br>Bronx, NY 10457<br>UNITED STATES                                    | St. Barnabas Hospital<br>Institutional Review Board<br>Mills Building, Fourth Floor<br>4422 Third Avenue<br>Bronx, NY 10457-2594<br>UNITED STATES   |
| 1163 *        | Dr. David L. Balfe            |                           | Dr. Michael Ian Lewis<br>Dr. Aruna Rekha Murthy<br>Dr. Vivian Shirvani                                                                                               | Cedars-Sinai Medical Center<br>#6732<br>8700 Beverly Boulevard<br>Los Angeles, CA 90048<br>UNITED STATES     | Cedars Sinai Medical Center<br>Institutional Review Board<br>8700 Beverly Blvd.<br>North Towe Plaza, 2015<br>Los Angeles, CA 90048<br>UNITED STATES |

090177e1816ca80c\Approved\Approved On: 06-Oct-2010 15:16

\* Did not randomize subjects

090177e1816ca80c\Approved\Approved On: 06-Oct-2010 15:16

| <u>Center</u> | <u>Principal Investigator</u>                                 | <u>Co-Investigator(s)</u> | <u>Sub-Investigator(s)</u>                                                                                               | <u>Address(es)</u>                                                                                                                                                                                                                                                                                                             | <u>Institutional Review Board or Ethics Committee Address(es)</u>                                                                                                     |
|---------------|---------------------------------------------------------------|---------------------------|--------------------------------------------------------------------------------------------------------------------------|--------------------------------------------------------------------------------------------------------------------------------------------------------------------------------------------------------------------------------------------------------------------------------------------------------------------------------|-----------------------------------------------------------------------------------------------------------------------------------------------------------------------|
| 1165 *        | Dr. Arthur P. Wheeler                                         |                           | Dr. Gordon Raphael<br>Bernard<br>Teresa M. Welch                                                                         | Drug Shipment<br>Address/Vanderbilt University<br>Medical Center<br>Investigational Drug Service<br>Attn: Lori M. Choate<br>1161 21st Avenue South,<br>VUH Room B-101<br>Nashville, TN 37232<br>UNITED STATES<br><br>Vanderbilt University Medical<br>Center<br>1161 21st Avenue South<br>Nashville, TN 37232<br>UNITED STATES | VANDERBILT UNIVERSITY<br>MEDICAL CENTER<br>Vanderbilt University Institutional<br>Review Board<br>D-3232 Medical Center North<br>Nashville, TN 37232<br>UNITED STATES |
| 1168          | Dr. Peter Kenneth Linden<br>(Previous PI)<br>Dr. Sachin Yende |                           | Karl Crevar<br>Joseph M. Darby<br>Dr. Scott R. Gunn<br>Dr. Jason E. Moore<br>Juan B. Ochoa<br>Dr. Ramesh<br>Vankataraman | UPMC-Presbyterian<br>200 Lothrop Street<br>Pittsburgh, PA 15213<br>UNITED STATES                                                                                                                                                                                                                                               | University of Pittsburgh<br>Institutional Review Board<br>Ground Level<br>3500 Fifth Avenue<br>Pittsburgh, PA 15213<br>UNITED STATES                                  |
| 1171          | Dr. Benjamin Dave<br>Margolis                                 |                           | Dr. Juan R. Herena<br>Dr. Anthony M. Marinelli<br>Jr.                                                                    | West Suburban Hospital Medical<br>Center<br>Ste 3000<br>1 Erie Court<br>Oak Park, IL 60302-2566<br>UNITED STATES                                                                                                                                                                                                               | Western Institutional Review Board<br>3535 Seventh Avenue, SW<br>Olympia, WA 98502<br>UNITED STATES                                                                   |
| 1172          | Dr. Luis J. Lugo-Velez                                        |                           | Dr. Omar L. Caban-<br>Acevedo<br>Dr. Domingo Chardon-<br>Feliciano<br>Dr. Federico Montealegre                           | Ponce School of Medicine<br>388 Zona Industila Reparada 2<br>Ponce, PR 00716<br>UNITED STATES                                                                                                                                                                                                                                  | Western Institutional Review Board<br>3535 Seventh Avenue, SW<br>Olympia, WA 98502-5010<br>UNITED STATES                                                              |

\* Did not randomize subjects

| <u>Center</u> | <u>Principal Investigator</u> | <u>Co-Investigator(s)</u> | <u>Sub-Investigator(s)</u>                                                                                                                                                                                                                                                                                | <u>Address(es)</u>                                                                                                                  | <u>Institutional Review Board or Ethics Committee Address(es)</u>                                                                                                                                                                             |
|---------------|-------------------------------|---------------------------|-----------------------------------------------------------------------------------------------------------------------------------------------------------------------------------------------------------------------------------------------------------------------------------------------------------|-------------------------------------------------------------------------------------------------------------------------------------|-----------------------------------------------------------------------------------------------------------------------------------------------------------------------------------------------------------------------------------------------|
| 1176          | Dr. John Richard Siever       |                           | Dr. Gregory Scott Ahearn<br>Carolyn Beno<br>Dr. Jeremy Feldman<br>Dr. James R. Forseth<br>Dr. Muhammad Raza<br>Dr. Richard Sue<br>Dr. Shawn E. Wright                                                                                                                                                     | St. Joseph's Hospital and Medical Center<br>SELECT Specialty Hospital<br>350 West Thomas Road<br>Phoenix, AZ 85013<br>UNITED STATES | St. Joseph's Hospital and Medical Center, Institutional Review Board<br>350 West Thomas Road<br>Phoenix, AZ 85013<br>UNITED STATES<br><br>Western Institutional Review Board<br>3535 Seventh Avenue, SW<br>Olympia, WA 98502<br>UNITED STATES |
| 1177          | Dr. Suresh K. Agarwal Jr.     |                           | John Abbensetts<br>Dawn M. Angelini<br>Dr. Peter A. Burke<br>Dr. Philip A. Cohen<br>Nancy Connors<br>Dr. Richard C. Dennis<br>Dr. Timothy A. Emhoff<br>Dr. Andrew I. Glantz<br>Patricia Harrison<br>Dr. Erwin F. Hirsch<br>Lauren Howard<br>Dr. Ishaq I. Lat<br>Eric Mahoney<br>Janet Orf<br>Amanda Young | Boston University Medical Center<br>One Boston Medical Center Place<br>Dowling 2 South<br>Boston, MA 02118<br>UNITED STATES         | Western Institutional Review Board<br>3535 Seventh Avenue, SW<br>Olympia, WA 98502-5010<br>UNITED STATES                                                                                                                                      |

090177e1816ca80c\Approved\Approved On: 06-Oct-2010 15:16

\* Did not randomize subjects

090177e1816ca80c\Approved\Approved On: 06-Oct-2010 15:16

| <u>Center</u> | <u>Principal Investigator</u> | <u>Co-Investigator(s)</u> | <u>Sub-Investigator(s)</u>                                                                                                                                                                                                                                                                                      | <u>Address(es)</u>                                                                                                                                                                                                                            | <u>Institutional Review Board or Ethics Committee Address(es)</u>                                                                                                                  |
|---------------|-------------------------------|---------------------------|-----------------------------------------------------------------------------------------------------------------------------------------------------------------------------------------------------------------------------------------------------------------------------------------------------------------|-----------------------------------------------------------------------------------------------------------------------------------------------------------------------------------------------------------------------------------------------|------------------------------------------------------------------------------------------------------------------------------------------------------------------------------------|
| 1179          | Dr. Richard W. Snyder         |                           | Mr. Chad Barefoot<br>Mary Beredjiklian<br>Dr. Christopher G. Bosse<br>Dr. G. Chris Christensen<br>Dr. Joseph G. Crocetti<br>Dr. Richard E. Friedenheim<br>Mary H. Kelly<br>Dr. Henry S. Mishel<br>Ms. Barbara Pugh<br>Dr. Conrad C. Reed<br>Dr. Bruce Roy<br>Dr. Stanley P. Silverman<br>Dr. William Louis Ward | Abington Memorial Hospital<br>1200 Old York Road<br>Abington, PA 19001<br>UNITED STATES                                                                                                                                                       | Abington Memorial Hospital<br>Institutional Review Board<br>1200 Old York Road<br>Abington, PA 19001-3788<br>UNITED STATES                                                         |
| 1181          | Julin F. Tang                 |                           | Mark S. Siobal<br>Dr. Lisa Gail Winston                                                                                                                                                                                                                                                                         | San Francisco General Hospital<br>1001 Protrero Avenue<br>San Francisco, CA 94110<br>UNITED STATES                                                                                                                                            | University of California, San Francisco<br>Office of Research, Committee on Human Research<br>Suite 315<br>3333 California Avenue<br>San Francisco, CA 94143-0962<br>UNITED STATES |
| 1182          | Dr. Stephen Leonard Barnes    |                           | Mr. Richard D. Branson<br>Dr. Kenneth R. Davis Jr.<br>Dr. Jay Albert<br>Johannigman<br>Dr. Tim Pritts<br>Dr. Betty Tsuei                                                                                                                                                                                        | University Hospital, Inc.<br>234 Goodman Street<br>Cincinnati, OH 45219<br>UNITED STATES<br><br>University of Cincinnati Medical Center/Department of Surgery<br>ML0558<br>231 Albert Sabin Way<br>Cincinnati, OH 45267-0558<br>UNITED STATES | University of Cincinnati Medical Center Institutional Review Board<br>G08 Wherry Hall<br>Cincinnati, OH 45267<br>UNITED STATES                                                     |

\* Did not randomize subjects

090177e1816ca80c\Approved\Approved On: 06-Oct-2010 15:16

| <u>Center</u> | <u>Principal Investigator</u>   | <u>Co-Investigator(s)</u> | <u>Sub-Investigator(s)</u>                                                                                                                                                                                                                                                                      | <u>Address(es)</u>                                                                                                                                                                                                                   | <u>Institutional Review Board or Ethics Committee Address(es)</u>                                                                                                                                                                                                                                                                                                                                                      |
|---------------|---------------------------------|---------------------------|-------------------------------------------------------------------------------------------------------------------------------------------------------------------------------------------------------------------------------------------------------------------------------------------------|--------------------------------------------------------------------------------------------------------------------------------------------------------------------------------------------------------------------------------------|------------------------------------------------------------------------------------------------------------------------------------------------------------------------------------------------------------------------------------------------------------------------------------------------------------------------------------------------------------------------------------------------------------------------|
| 1183          | Dr. Julio A. Ramirez            |                           | Mary Beth Allen<br>Dr. Marty Allen<br>Amirali Ali Amjadi<br>Dr. Forest W. Arnold<br>Uchenna Ezike<br>Rama Kapoor<br>Dr. Pauline A. Lett<br>Dr. Maricar F. Malinis<br>Dr. Raul Nakamatsu<br>Alpa Patel<br>Paula Peyrani<br>Dr. Paul S. Schulz<br>Maria Tillan<br>Inemesit Umoren<br>Cathy Whalen | Ambulatory Care Building<br>550 South Jackson Street<br>Louisville, KY 40202<br>UNITED STATES<br><br>University Hospital<br>530 South Jackson Street<br>Louisville, KY 40202<br>UNITED STATES                                        | University of Louisville<br>Human Subjects Protection Program<br>Office<br>MedCenter One, Suite 200<br>501 East Broadway<br>Louisville, KY 40202<br>UNITED STATES                                                                                                                                                                                                                                                      |
| 1184 *        | Dr. Cash R. Beechler            |                           | Dr. Paul J. Conomos<br>Dr. James E. Mojica<br>Dr. Paul Terry Steinmetz<br>Arthur J. Tillinghast<br>Dr. Karen L. Wright                                                                                                                                                                          | Scottsdale HealthCare Shea<br>9003 East Shea Blvd.<br>Scottsdale, AZ 85260<br>UNITED STATES                                                                                                                                          | Scottsdale Healthcare Shea<br>Institutional Review Board<br>9003 East Shea Boulevard<br>Scottsdale, AZ 85260<br>UNITED STATES                                                                                                                                                                                                                                                                                          |
| 1190 *        | Dr. Albert H. Olivencia-Yurvati |                           | Dr. Barbara A. Atkinson<br>Dr. Mirza W. Baig<br>Arnold A. Fikkert<br>Mr. Christopher Hayes<br>Dr. Mark Joseph Hupert                                                                                                                                                                            | Plaza Medical Center of Fort Worth<br>900 8th Avenue<br>Fort Worth, TX 76104<br>UNITED STATES<br><br>UNIVERSITY OF NORTH TEXAS HEALTH SCIENCE CENTER AT FORT WORTH<br>855 MONTGOMERY STREET<br>FORT WORTH, TX 76107<br>UNITED STATES | Plaza Medical Center of Fort Worth<br>Institutional Review Board for the Protection of Human Subjects<br>900 Eight Avenue<br>Fort Worth, TX 76104<br>UNITED STATES<br><br>University of North Texas Health Science Center at Fort Worth, Texas<br>College of Osteopathic Medicine<br>Institutional Review Board for the Protection of Human Subjects<br>999 Montgomery Street<br>Fort Worth, TX 76107<br>UNITED STATES |

\* Did not randomize subjects

| <u>Center</u> | <u>Principal Investigator</u> | <u>Co-Investigator(s)</u> | <u>Sub-Investigator(s)</u>                                                                                                                                                                      | <u>Address(es)</u>                                                                                                                                                                                                                                                                                     | <u>Institutional Review Board or Ethics Committee Address(es)</u>                                                                             |
|---------------|-------------------------------|---------------------------|-------------------------------------------------------------------------------------------------------------------------------------------------------------------------------------------------|--------------------------------------------------------------------------------------------------------------------------------------------------------------------------------------------------------------------------------------------------------------------------------------------------------|-----------------------------------------------------------------------------------------------------------------------------------------------|
| 1197          | Dr. Steven Wallace<br>Parker  |                           | Donna L. Dominguez<br>Dr. Michael Vincent<br>Jackson<br>Dr. Franklin Kevin<br>Murphy<br>Elaine M. Yee                                                                                           | Pulmonary Medicine Associates<br>Suite 801<br>236 W. 6th Street<br>Reno, NV 89503<br>UNITED STATES<br><br>Renown Regional Medical<br>Center<br>1155 Mill Street<br>Reno, NV 89502<br>UNITED STATES<br><br>Sierra Infectious Diseases<br>Suite 705<br>75 Pringle Way<br>Reno, NV 89502<br>UNITED STATES | Renown Regional Medical Center<br>Institutional Review Board<br>Mail Stop X-19<br>1155 Mill Street<br>Reno, NV 89502<br>UNITED STATES         |
| 1199          | Dr. Lee Edward Morrow         |                           | Kristi L. Farrington<br>Amy A. Keyes<br>Dr. Richard D. Le<br>Lori D. Mahon<br>Mark A. Malesker<br>Francisco A. Romero Jr.<br>Dr. Dan Schuller<br>Dr. Robert E. Wear III<br>Dr. Tammy O. Wichman | Creighton University Medical<br>Center<br>601 North 30th Street<br>Omaha, NE 68131<br>UNITED STATES                                                                                                                                                                                                    | Creighton University Institutional<br>Review Board<br>Research Compliance Office<br>2500 California Plaza<br>Omaha, NE 68178<br>UNITED STATES |

090177e1816ca80c\Approved\Approved On: 06-Oct-2010 15:16

\* Did not randomize subjects

| <u>Center</u> | <u>Principal Investigator</u> | <u>Co-Investigator(s)</u> | <u>Sub-Investigator(s)</u>                                                                                                                                                                                                                                                                                                                                                                                                                                                                                                                                                                                                        | <u>Address(es)</u>                                                                           | <u>Institutional Review Board or Ethics Committee Address(es)</u>                                                                               |
|---------------|-------------------------------|---------------------------|-----------------------------------------------------------------------------------------------------------------------------------------------------------------------------------------------------------------------------------------------------------------------------------------------------------------------------------------------------------------------------------------------------------------------------------------------------------------------------------------------------------------------------------------------------------------------------------------------------------------------------------|----------------------------------------------------------------------------------------------|-------------------------------------------------------------------------------------------------------------------------------------------------|
| 1200          | Dr. Gyorgy Frenzl             |                           | Hina Alam<br>Dr. Rodrigo F. Alban Barba<br>Dr. Edward R. Garcia Syeda Z. Gardezi<br>Sean Garvin<br>Dr. William B. Gormley<br>Dr. James P. Hardy<br>Joaquim Havens<br>Peter C. Hou<br>Dr. Petr Jarolim<br>Edward Kelly<br>Barrett T. Kitch<br>Dr. Anthony F. Massaro<br>Dr. Kimberly Matzie<br>Dr. Shannon Sue McKenna<br>Chad M. Meyers<br>Dr. Fani Nhuch<br>Dr. David Oxman<br>Arvind Palanisamy<br>Dr. James D. Rawn<br>Amy L. Rezak<br>Dr. Selwyn O. Rogers<br>Dr. Nicholas Sadovnikoff<br>Naomi Shimizu<br>James F. Watkins<br>Dr. Gerald L. Weinhouse<br>Dr. Maxwell Weinmann<br>Dr. Mallory Williams<br>Dr. Joshua H. Winer | Brigham and Women's Hospital<br>75 Francis Street<br>Boston, MA 02115<br>UNITED STATES       | Partners Human Research Committee<br>Partners Human Research Office<br>Suite 1002<br>116 Huntington Avenue<br>Boston, MA 02116<br>UNITED STATES |
| 1201 *        | Dr. Andrew F. Shorr           |                           | Dr. Nazli Bolouri<br>Dr. Chee Chan<br>Dr. Daniel L. Herr<br>Pejman Kharazi<br>Mary Margaret Lewis<br>Claude William Nogay<br>martin pinkett                                                                                                                                                                                                                                                                                                                                                                                                                                                                                       | Washington Hospital Center<br>110 Irving Street, NW<br>Washington, DC 20010<br>UNITED STATES | Medstar Research Institute<br>Institutional Review Board<br>Suite 201<br>6495 New Hampshire Avenue<br>Hyattsville, MD 20783<br>UNITED STATES    |

090177e1816ca80c\Approved\Approved On: 06-Oct-2010 15:16

\* Did not randomize subjects

| <u>Center</u> | <u>Principal Investigator</u> | <u>Co-Investigator(s)</u> | <u>Sub-Investigator(s)</u>                                                                                                                                                             | <u>Address(es)</u>                                                                                                                                                                                                                                                                                                        | <u>Institutional Review Board or Ethics Committee Address(es)</u>                                                                                                                      |
|---------------|-------------------------------|---------------------------|----------------------------------------------------------------------------------------------------------------------------------------------------------------------------------------|---------------------------------------------------------------------------------------------------------------------------------------------------------------------------------------------------------------------------------------------------------------------------------------------------------------------------|----------------------------------------------------------------------------------------------------------------------------------------------------------------------------------------|
| 1208          | Dr. Adel M. Bassily-Marcus    |                           | Dr. Ernest Benjamin<br>Rosanna Del Giudice<br>Evan Grolley<br>Dr. Roopa Kohli-Seth<br>Andrew B. Leibowitz<br>Dr. Steven Lin<br>Dr. Anthony Robert<br>Manasia<br>Dr. John Mark Oropello | Mount Sinai Medical Center<br>One Gustave L. Levy Place<br>New York, NY 10029<br>UNITED STATES                                                                                                                                                                                                                            | Mount Sinai School of Medicine<br>Institutional Review Board<br>Box 1075<br>One Gustave L. Levy Place<br>Icahn Medical Institute, Building 4-78<br>New York, NY 10029<br>UNITED STATES |
| 1218          | Dr. Roy C. St. John           |                           | Joan C. Cook<br>Erin M. Gedling                                                                                                                                                        | Columbus Pulmonary and Critical Care<br>Suite 610<br>745 West State Street<br>Columbus, OH 43222<br>UNITED STATES<br><br>Mount Carmel West Hospital<br>793 West State Street<br>Columbus, OH 43222<br>UNITED STATES<br><br>Remington-Davis, Inc.<br>Suite 106A<br>1335 Dublin Road<br>Columbus, OH 43215<br>UNITED STATES | Mount Carmel Health System<br>Human Subject Protection Office,<br>Corporate Services Center<br>6150 East Broad Street<br>Columbus, OH 43213<br>UNITED STATES                           |

090177e1816ca80c\Approved\Approved On: 06-Oct-2010 15:16

\* Did not randomize subjects



090177e1816ca80c\Approved\Approved On: 06-Oct-2010 15:16

| <u>Center</u> | <u>Principal Investigator</u>    | <u>Co-Investigator(s)</u> | <u>Sub-Investigator(s)</u>                                                                                                                                                                                                                                                                                                                                                             | <u>Address(es)</u>                                                                                                                                                                                                                                                                                                                                                                                                            | <u>Institutional Review Board or Ethics Committee Address(es)</u>                                                                                                                                          |
|---------------|----------------------------------|---------------------------|----------------------------------------------------------------------------------------------------------------------------------------------------------------------------------------------------------------------------------------------------------------------------------------------------------------------------------------------------------------------------------------|-------------------------------------------------------------------------------------------------------------------------------------------------------------------------------------------------------------------------------------------------------------------------------------------------------------------------------------------------------------------------------------------------------------------------------|------------------------------------------------------------------------------------------------------------------------------------------------------------------------------------------------------------|
| 1219          | Dr. Luis Ernesto Jauregui Peredo |                           | Dr. Arlette Tanos Aouad<br>Pamela H. Beavers<br>Charles M. Bork<br>Dr. Tanyanyiwa W. Chinyadza<br>Lisa S. Graham<br>Dr. Srinivas Katragadda<br>Dr. Vijay Kumar Mahajan<br>Mary M. McCormick<br>Ms. Kristen Kay Zaiger Miller<br>Dr. Nelson Nicolasora<br>Darla J. Scott<br>Mary E. Scott<br>Tina M. Steinhauer<br>Dr. Darrell Wayne Stuart<br>Dee Ann Tilley<br>Dr. James Anthony Tita | ID Clinical Research, LTD<br>Suite 203<br>2409 Cherry Street<br>Toledo, OH 43608<br>UNITED STATES<br><br>Infectious Disease Associates of Northwest Ohio, Inc.<br>#1400<br>2222 Cherry Street<br>Toledo, OH 43608<br>UNITED STATES<br><br>Regency Hospital<br>5220 West Alexis Road<br>Sylvania, OH 43560<br>UNITED STATES<br><br>St. Vincent Mercy Medical Center<br>2213 Cherry Street<br>Toledo, OH 43608<br>UNITED STATES | St. Vincent Mercy Medical Center<br>Institutional Review Board<br>2213 Cherry Street<br>Toledo, OH 43608<br>UNITED STATES                                                                                  |
| 1220          | Dr. Luca M. Bigatello            |                           | Houman Amirfarzan<br>Dr. Robert S. Harris<br>Dr. Judith Hellman<br>Kanya Kumwilaisak<br>Silvia Pivi<br>Dr. Ulrich H. Schmidt                                                                                                                                                                                                                                                           | Massachusetts General Hospital<br>Clinics 309<br>55 Fruit Street<br>Boston, MA 02114<br>UNITED STATES                                                                                                                                                                                                                                                                                                                         | Partners Human Research Committee<br>Partners Human Research Office<br>Suite 1002<br>116 Huntington Avenue<br>Boston, MA 02116<br>UNITED STATES                                                            |
| 1229 *        | Dr. Marc J. Shapiro              |                           | Eileen Finnin<br>Debbie A. Fitzgerald<br>Dr. Michael F. Paccione<br>Wayne Patterson<br>Steven Sandoval                                                                                                                                                                                                                                                                                 | Stony Brook University Hospital<br>101 Nicolls Road<br>Stony Brook, NY 11794<br>UNITED STATES                                                                                                                                                                                                                                                                                                                                 | Stony Brook University Institutional Review Board<br>Office of Vice President of Research<br>Research Information and Compliance<br>Melville Library Fifth Floor<br>Stony Brook, NY 11794<br>UNITED STATES |

\* Did not randomize subjects

| <u>Center</u> | <u>Principal Investigator</u> | <u>Co-Investigator(s)</u> | <u>Sub-Investigator(s)</u>                                                                                                                                                                                                                                                                  | <u>Address(es)</u>                                                                                                                                                                                | <u>Institutional Review Board or Ethics Committee Address(es)</u>                                             |
|---------------|-------------------------------|---------------------------|---------------------------------------------------------------------------------------------------------------------------------------------------------------------------------------------------------------------------------------------------------------------------------------------|---------------------------------------------------------------------------------------------------------------------------------------------------------------------------------------------------|---------------------------------------------------------------------------------------------------------------|
| 1230          | Dr. Therese M. Duane          |                           | Michel Badih Aboutanos<br>Christopher Todd Borchers<br>Dr. Rao R. Ivatury<br>Lori B. Kei<br>Dr. Ajai Kumar Malhotra<br>Robin Gregory<br>Sculthorpe                                                                                                                                          | Virginia Commonwealth University Medical Center, Div. of Trauma, Critical Care & Emergency Medicine<br>West Hospital, 15th Floor<br>1200 East Broad Street<br>Richmond, VA 23219<br>UNITED STATES | Western Institutional Review Board, Inc.<br>3535 Seventh Avenue SW<br>Olympia, WA 98502-5010<br>UNITED STATES |
| 1231          | Dr. Edgar J. Jimenez          |                           | Dr. Philip Anthony Giordano<br>Dr. Rakesh C. Gupta<br>Samantha Munro<br>Christina Robinson<br>Dr. Carlos A. Ruiz<br>Dr. Orlando Ismael Ruiz Rodriquez<br>Dr. Jeffrey Adam<br>Sadowsky<br>Jean Schiller<br>Donald C. Vickers<br>Laura H. Waite<br>Dr. Kurt D. Weber<br>Dr. Christian C Zuver | Lucerne Hospital<br>818 Main Lane<br><br>Orlando, FL 32801<br>UNITED STATES<br><br>Orlando Regional Medical Center<br>1414 Kuhl Avenue<br>Orlando, FL 32806<br>UNITED STATES                      | Orlando Health Institutional Review Board<br>1414 Kuhl Avenue<br><br>Orlando, FL 32806<br>UNITED STATES       |

090177e1816ca80c\Approved\Approved On: 06-Oct-2010 15:16

\* Did not randomize subjects

090177e1816ca80c\Approved\Approved On: 06-Oct-2010 15:16

| <u>Center</u> | <u>Principal Investigator</u> | <u>Co-Investigator(s)</u> | <u>Sub-Investigator(s)</u>                                                                                                                                                                                                                                                                                                                                                                             | <u>Address(es)</u>                                                                                                                                                                                             | <u>Institutional Review Board or Ethics Committee Address(es)</u>                                                                                                                                                                             |
|---------------|-------------------------------|---------------------------|--------------------------------------------------------------------------------------------------------------------------------------------------------------------------------------------------------------------------------------------------------------------------------------------------------------------------------------------------------------------------------------------------------|----------------------------------------------------------------------------------------------------------------------------------------------------------------------------------------------------------------|-----------------------------------------------------------------------------------------------------------------------------------------------------------------------------------------------------------------------------------------------|
| 1237          | Elamin Muhamoud<br>Elamin     |                           | Dr. Susan E. Beltz<br>Dr. Azra Bihorac<br>Dr. Sarah Elizabeth Bush<br>Dr. Lawrence Joseph Caruso<br>Dr. Marlena Allison Fox<br>Dr. Andrea Gabrielli<br>Dr. Thomas James Gallagher<br>Dr. Deborah Ann Kahler<br>Dr. Abraham Joseph Layon<br>Dr. Aimee Christine LeClaire<br>Dr. Larry Christopher Martin<br>Dr. Mona K. Patel<br>Dr. Carl W. Peters<br>Dr. Margaret Ross Thomson<br>Dr. Angela R. Wills | Shands Hospital University of Florida<br>1600 Southwest Archer Road<br>Gainesville, FL 32610<br>UNITED STATES                                                                                                  | Western Institutional Review Board<br>PO Box 12029<br>3535 Seventh Avenue, SW<br>Olympia, WA 98502<br>UNITED STATES                                                                                                                           |
| 1239          | Dr. Miguel M. Mogyoros        |                           | Dr. Jennifer Bilotft                                                                                                                                                                                                                                                                                                                                                                                   | Exempla Saint Joseph Hospital<br>1835 Franklin Street<br>Denver, CO 80218<br>UNITED STATES<br><br>Kaiser Permanente<br>20th Avenue Medical Center<br>2045 Franklin Street<br>Denver, CO 80205<br>UNITED STATES | Exempla Healthcare Institutional Review Board<br>1835 Franklin Street<br>Denver, CO 80218<br>UNITED STATES<br><br>Kaiser Permanente Institutional Review Board<br>Suite 300<br>10065 East Harvard Avenue<br>Denver, CO 80231<br>UNITED STATES |

\* Did not randomize subjects

| <u>Center</u> | <u>Principal Investigator</u> | <u>Co-Investigator(s)</u> | <u>Sub-Investigator(s)</u>                                                                                                                                                                                                                                            | <u>Address(es)</u>                                                                               | <u>Institutional Review Board or Ethics Committee Address(es)</u>                                                                                       |
|---------------|-------------------------------|---------------------------|-----------------------------------------------------------------------------------------------------------------------------------------------------------------------------------------------------------------------------------------------------------------------|--------------------------------------------------------------------------------------------------|---------------------------------------------------------------------------------------------------------------------------------------------------------|
| 1244          | Dr. Alejandro C. Arroliga     |                           | Faith S. Rothermel<br>Dr. Christopher D. Spradley                                                                                                                                                                                                                     | Scott and White Memorial Hospital<br>2401 South 31st Street<br>Temple, TX 76508<br>UNITED STATES | Scott and White Memorial Hospital Institutional Review Board<br>2401 South 31st Street<br>Temple, TX 76508<br>UNITED STATES                             |
| 1245          | Dr. Charles A. Adams Jr.      |                           | Steven Benkert<br>Michael Connolly<br>Dr. Kevin Maier Dushay<br>Shea Gregg<br>David T. Harrington<br>David Heffernan<br>Dr. James Raymond<br>Klinger<br>Matthew S. Kozloff<br>Mitchell M. Levy<br>Kenneth A. Lynch<br>Sarah D. Majercik<br>Maria Andrea<br>Monckeberg | Rhode Island Hospital<br>APC 415<br>593 Eddy Street<br>Providence, RI 02903<br>UNITED STATES     | Rhode Island Hospital<br>Office of Research Administration<br>Aldrich Building, Fifth Floor<br>593 Eddy Street<br>Providence, RI 02903<br>UNITED STATES |

090177e1816ca80c\Approved\Approved On: 06-Oct-2010 15:16

\* Did not randomize subjects

| <u>Center</u> | <u>Principal Investigator</u> | <u>Co-Investigator(s)</u> | <u>Sub-Investigator(s)</u>                                                                                         | <u>Address(es)</u>                                                                                                                                                                                                                                                                                                                                                                                                            | <u>Institutional Review Board or Ethics Committee Address(es)</u>       |
|---------------|-------------------------------|---------------------------|--------------------------------------------------------------------------------------------------------------------|-------------------------------------------------------------------------------------------------------------------------------------------------------------------------------------------------------------------------------------------------------------------------------------------------------------------------------------------------------------------------------------------------------------------------------|-------------------------------------------------------------------------|
| 1246          | Dr. Joseph Barney             |                           | Dr. Jennifer Davis<br>Dr. Mark Dransfield<br>Melissa Garner<br>Rebecca Quinn<br>Nancy Stansfield<br>Keith M. Wille | UAB Hospital<br>619 South 19th Street<br>Birmingham, AL 35294<br>UNITED STATES<br><br>UAB Hospital / Russell<br>Pharmacy<br>RAC 117<br>1813 6th Ave<br>Birmingham, AL 35294<br>UNITED STATES<br><br>UAB Lung Health Center<br>526 20th Street South<br>Birmingham, AL 35249<br>UNITED STATES<br><br>University of Alabama at<br>Birmingham Kirklin Clinic<br>2000 Sixth Avenue South<br>Birmingham, AL 35233<br>UNITED STATES | WIRB<br>3535 Seventh Ave. SW<br>Olympia, WA 98502-5010<br>UNITED STATES |

090177e1816ca80c\Approved\Approved On: 06-Oct-2010 15:16

\* Did not randomize subjects

090177e1816ca80c\Approved\Approved On: 06-Oct-2010 15:16

| <u>Center</u> | <u>Principal Investigator</u> | <u>Co-Investigator(s)</u> | <u>Sub-Investigator(s)</u>                                                                                                                                                                                                                                                                                                                                     | <u>Address(es)</u>                                                                        | <u>Institutional Review Board or Ethics Committee Address(es)</u>                                                             |
|---------------|-------------------------------|---------------------------|----------------------------------------------------------------------------------------------------------------------------------------------------------------------------------------------------------------------------------------------------------------------------------------------------------------------------------------------------------------|-------------------------------------------------------------------------------------------|-------------------------------------------------------------------------------------------------------------------------------|
| 1249          | Dr. Timothy Eugene Albertson  |                           | Dr. Roblee Peter Allen<br>Dr. Mark Avdalovic<br>Dr. Andrew Leong Chan<br>Cinda Christensen<br>Jordan Fein<br>Jason Ferries<br>Dr. Kimberly Ann Hardin<br>Dr. Richart Harper<br>Heba A. Ismail<br>Dr. Nicholas James Kenyon<br>Dr. Samuel Louie<br>Dr. Brian Morrissey<br>Anandray Patel<br>Dr. Christian Erik Sandrock<br>Matthew P. Sisitki<br>Dr. Ken Yoneda | UC Davis Medical Center<br>2315 Stockton Blvd<br>Sacramento, CA 95817<br>UNITED STATES    | IRB Administration<br>Suite 1400<br>2921 Stockton Boulevard<br>CTSC Building<br>Sacramento, CA 95817<br>UNITED STATES         |
| 1250          | Dr. Eugene Carl Fletcher Jr.  |                           | Krystal Angevine<br>LeAnn Doddridge<br>Joyce Fletcher<br>James Isbell<br>Ryan Pickhardt<br>Judy Sepulveda                                                                                                                                                                                                                                                      | Floyd Memorial Hospital<br>1850 State Street<br>New Albany, IN 47151<br>UNITED STATES     | Floyd Memorial Hospital and Health Services<br>1850 State Street<br>New Albany, IN 47150<br>UNITED STATES                     |
| 1251 *        | Dr. Rudolf J. Kotula          |                           | Dr. Kyle Mills                                                                                                                                                                                                                                                                                                                                                 | Swedish Medical Center<br>501 East Hampden Avenue<br>Englewood, CO 80110<br>UNITED STATES | HCA HealthONE Institutional Review Board<br>Suite 265A<br>720 South Colorado Boulevard<br>Glendale, CO 80246<br>UNITED STATES |

\* Did not randomize subjects

090177e1816ca80c\Approved\Approved On: 06-Oct-2010 15:16

| <u>Center</u> | <u>Principal Investigator</u> | <u>Co-Investigator(s)</u> | <u>Sub-Investigator(s)</u>                                                                                                                                                                           | <u>Address(es)</u>                                                                                                                                                                                                                                                     | <u>Institutional Review Board or Ethics Committee Address(es)</u>                                                                  |
|---------------|-------------------------------|---------------------------|------------------------------------------------------------------------------------------------------------------------------------------------------------------------------------------------------|------------------------------------------------------------------------------------------------------------------------------------------------------------------------------------------------------------------------------------------------------------------------|------------------------------------------------------------------------------------------------------------------------------------|
| 1252          | Dr. Paul James Carson         |                           | Abdulhamid Alkhalaf<br>Augusto Alonto<br>steven briggs<br>Hasrat Khan<br>Regis Lager<br>David McNamara<br>Dr. Robert Nelson<br>Frank Sepe<br>Almothana Shanaah<br>Gino Tapia-Zegarra<br>Mark Tieszen | MeritCare Broadway Health Center<br>736 Broadway North<br>Fargo, ND 58122<br>UNITED STATES<br><br>MeritCare Clinic<br>737 Broadway North<br>Fargo, ND 58122<br>UNITED STATES<br><br>MeritCare Medical Center<br>801 Broadway North<br>Fargo, ND 58112<br>UNITED STATES | MeritCare Health System IRB<br>MeritCare Health System IRB<br>Route 701<br>801 Broadway N<br>Fargo, ND 58122-0701<br>UNITED STATES |
| 1253          | Dr. Richard V. Spera          |                           | Dr. Edward Eiland<br>Celeste Fletcher<br>Sheryl Guffin<br>Dr. Ali A. M. Hassoun<br>Jason Smith                                                                                                       | Alabama Infectious Disease Center, P.C.<br>301<br>420 Lowell Drive, SE<br>Huntsville, AL 35801<br>UNITED STATES<br><br>Huntsville Hospital<br>101 Sivley Road<br>Huntsville, AL 35801<br>UNITED STATES                                                                 | Huntsville Hospital Institutional Review Committee<br>101 Sivley Road<br>Huntsville, AL 35801<br>UNITED STATES                     |

\* Did not randomize subjects

| <u>Center</u> | <u>Principal Investigator</u> | <u>Co-Investigator(s)</u> | <u>Sub-Investigator(s)</u>                                                                                                                                                                                      | <u>Address(es)</u>                                                                                                                                                                                                                                                   | <u>Institutional Review Board or Ethics Committee Address(es)</u>                                                                         |
|---------------|-------------------------------|---------------------------|-----------------------------------------------------------------------------------------------------------------------------------------------------------------------------------------------------------------|----------------------------------------------------------------------------------------------------------------------------------------------------------------------------------------------------------------------------------------------------------------------|-------------------------------------------------------------------------------------------------------------------------------------------|
| 1254          | Muhammad Shibli               |                           | Jose Bordon<br>oyinlola Fashina                                                                                                                                                                                 | Providence Hospital<br>Suite # 203<br>1160 Varnum Street, NE<br>Washington, DC 20017<br>UNITED STATES<br><br>Providence Hospital<br>Clinical Research Center<br>Room 108 H<br>1150 Varnum Street North East<br>ACC Building<br>Washington, DC 20017<br>UNITED STATES | Western Institutional Review Board,<br>Inc.<br>WIRB<br>3535 Seventh Avenue, Southwest<br>Olympia, WA 98502-5010<br>UNITED STATES          |
| 1258          | Dr. Richard W. Light          |                           | Allie M Bell<br>Anupama G. Brixey<br>Hope Campbell<br>Dr. Alison Miller<br>Hollis O'Neal<br>Dr. Elisabeth Willers                                                                                               | Vanderbilt University<br>Institutional Review Board<br>1313 21st Ave South<br>Nashville, TN 37232<br>UNITED STATES<br><br>Vanderbilt University Medical<br>Center<br>1161 21st Ave<br>Nashville, TN 37232<br>UNITED STATES                                           | Vanderbilt University Institutional<br>Review Board<br>504 Oxford House<br>1313 21st Avenue South<br>Nashville, TN 37232<br>UNITED STATES |
| 1261          | Dr. David Conrad Willms       |                           | Melissa K. Brown<br>Mihaela Buda<br>Matthew Geriak<br>Dr. Charles Frederick<br>Landers<br>Thomas Lawrie<br>John LeMoine<br>Coletta O'Donnell<br>Richard Sacks<br>Enga M. Santman<br>Dr. Davies Yat-wing<br>Wong | Chest Medicine and Critical Care<br>Medical Group, INC<br>7901 Frost Street<br>San Diego, CA 92123<br>UNITED STATES                                                                                                                                                  | Sharp HealthCare IRB Office<br>8695 Spectrum Center Blvd.<br>San Diego, CA 92123<br>UNITED STATES                                         |

090177e1816ca80c\Approved\Approved On: 06-Oct-2010 15:16

\* Did not randomize subjects



| <u>Center</u> | <u>Principal Investigator</u> | <u>Co-Investigator(s)</u> | <u>Sub-Investigator(s)</u>                                                                                    | <u>Address(es)</u>                                                                                                                                                                                                                                                                                                                | <u>Institutional Review Board or Ethics Committee Address(es)</u>                                                |
|---------------|-------------------------------|---------------------------|---------------------------------------------------------------------------------------------------------------|-----------------------------------------------------------------------------------------------------------------------------------------------------------------------------------------------------------------------------------------------------------------------------------------------------------------------------------|------------------------------------------------------------------------------------------------------------------|
| 1262 *        | Dr. Paul James Manos          |                           | Dr. Ken Ray Iwaoka<br>Kia Lee<br>Alison J. McManus<br>Dr. William Dabney<br>ORiordan<br>Andrew Nathan Ramirez | eStudySite-Tri City Medical Center<br>Suite F<br>3998 Vista Way<br>Oceanside, CA 92056<br>UNITED STATES                                                                                                                                                                                                                           | Western Institutional Review Board, Inc.<br>3535 Seventh Avenue, SouthWest<br>Olympia, WA 98502<br>UNITED STATES |
| 1263 *        | Dr. Jan Alan Winetz           |                           | Lizbeth Flores-Byrne<br>Ms. Emily Foo<br>Dr. William Dabney<br>ORiordan                                       | eStudySite<br>Good Samaritan Hospital<br>Suite 504<br>2505 Samaritan Drive<br>San Jose, CA 95124<br>UNITED STATES<br><br>Good Samaritan Hospital<br>2425 Samaritan Drive<br>San Jose, CA 95124<br>UNITED STATES<br><br>Good Samaritan Research Office<br>Suite 504<br>2505 Samaritan Drive<br>San Jose, CA 95124<br>UNITED STATES | WESTERN IRB<br>WESTERN IRB<br>3535 7TH AVENUE SW<br>OLYMPIA, WA 98502<br>UNITED STATES                           |

090177e1816ca80c\Approved\Approved On: 06-Oct-2010 15:16

\* Did not randomize subjects

| <u>Center</u> | <u>Principal Investigator</u> | <u>Co-Investigator(s)</u> | <u>Sub-Investigator(s)</u>                                                                                                                                                                                              | <u>Address(es)</u>                                                                                                                                                                                                                                                                                                                                                                                            | <u>Institutional Review Board or Ethics Committee Address(es)</u>                                                                                               |
|---------------|-------------------------------|---------------------------|-------------------------------------------------------------------------------------------------------------------------------------------------------------------------------------------------------------------------|---------------------------------------------------------------------------------------------------------------------------------------------------------------------------------------------------------------------------------------------------------------------------------------------------------------------------------------------------------------------------------------------------------------|-----------------------------------------------------------------------------------------------------------------------------------------------------------------|
| 1264          | Dr. Antonio Ramirez Anzueto   |                           | Dr. Sandra G. Adams<br>Marc Chalaby<br>Virginia Doyal<br>Michael John Gass<br>Jennifer Hillman<br>Timothy Houlihan<br>Stephanie Levine<br>Carlos Orozco<br>Jay Peters<br>Dr. Marcos Ignacio Restrepo<br>Juan F. Sanchez | South Texas Veterans Health Care System<br>AUDIE L MURPHY DIVISION<br>Pulmonary Disases<br>Mail Code 111E<br>7400 Merton-Minter Boulevard<br>San Antonio, TX 78284<br>UNITED STATES<br><br>University Hospital<br>4502 Medical Drive<br>San Antonio, TX 78229<br>UNITED STATES<br><br>University of Texas Health Care Sciences San Antonio<br>7703 Floyd Curl Drive<br>San Antonio, TX 78229<br>UNITED STATES | University of Texas Health Care Sciences San Antonio<br>Institutional Review Board (MC 7830)<br>7703 Floyd Curl Drive<br>San Antonio, TX 78229<br>UNITED STATES |
| 1265          | Dr. Gerard James Fulda        |                           | Jaime Cesar Giraldo Arango<br>Mark D. Cipolle<br>Lauren Danese<br>Dr. Michael R. Depietro<br>Dr. Frederick Alan Giberson<br>Steven A. Johnson<br>Michael Kalina<br>Dr. Michael Rhodes<br>Dr. Glenn Herman<br>Tinkoff    | Christiana Care Health Services<br>4755 Ogletown Stanton Road<br>Newark, DE 19718<br>UNITED STATES                                                                                                                                                                                                                                                                                                            | Christiana Care Health System<br>Institutional Review Board<br>Room 3400<br>501 W. 14th Street<br>Wilmington, DE 19899<br>UNITED STATES                         |

090177e1816ca80c\Approved\Approved On: 06-Oct-2010 15:16

\* Did not randomize subjects

090177e1816ca80c\Approved\Approved On: 06-Oct-2010 15:16

| <u>Center</u> | <u>Principal Investigator</u>    | <u>Co-Investigator(s)</u> | <u>Sub-Investigator(s)</u>                                                                                                                                                          | <u>Address(es)</u>                                                                                                                                                                                                                               | <u>Institutional Review Board or Ethics Committee Address(es)</u>                                                                              |
|---------------|----------------------------------|---------------------------|-------------------------------------------------------------------------------------------------------------------------------------------------------------------------------------|--------------------------------------------------------------------------------------------------------------------------------------------------------------------------------------------------------------------------------------------------|------------------------------------------------------------------------------------------------------------------------------------------------|
| 1266 *        | Dr. Lyssette de L. Cardona Bonet |                           | Javier Gonzalez<br>Dr. Jose Ramirez<br>Leira Ramira Ruiz<br>Griorgio Tarchini                                                                                                       | Cleveland Clinic Florida<br>2950 Cleveland Clinic Blvd<br>Weston, FL 33331<br>UNITED STATES<br><br>Cleveland Clinic Florida Hospital<br>3100 Weston Road<br>Weston, Fl 33331<br>UNITED STATES                                                    | Cleveland Clinic Florida Institutional Review Board<br>2950 Cleveland Clinic Boulevard<br>Weston, FL 33331<br>UNITED STATES                    |
| 1267          | Dr. Ali Albert El-Solh           |                           | Dr. Karin A. Provost<br>Dr. Sanjay Sethi                                                                                                                                            | Veterans Affairs of Western New York Health Care System<br>3495 Bailey Ave<br>Buffalo, NY 14215<br>UNITED STATES                                                                                                                                 | Veterans Affairs Of Western New York Healthcare System<br>3495 Bailey Avenue<br>Buffalo, NY 14215<br>UNITED STATES                             |
| 1268          | Dr. Firas A. Koura               |                           | Michael W. Raichel                                                                                                                                                                  | Hazard ARH Regional Medical Center<br><br>100 Medical Center Drive<br>Hazard, KY 41701<br>UNITED STATES                                                                                                                                          | Appalachian Regional Heather Care Inc IRB<br>100 Airport Gardens Road<br>Hazard, KY 41701<br>UNITED STATES                                     |
| 1270          | Dr. Michael R. Silver            |                           | Dr. Robert Allen Balk<br>Joyce D. Brown<br>Dr. Larry C. Casey<br>Christopher Crank<br>Dr. David P. Gurka<br>Dr. Omar Lateef<br>Gail Ruderman<br>Dr. Rajive Tandon<br>Dr. Mark Yoder | Rush University Medical Center<br>1653 West Congress Parkway<br>Chicago, IL 60612<br>UNITED STATES<br><br>Rush University Medical Center<br>Pulmonary Outpatient Clinic<br>Suite 050<br>1725 West Harrison<br>Chicago, IL 60612<br>UNITED STATES | Rush University Medical Center<br>Research and Clinical Trials Main Office<br>1653 West Congress Parkway<br>Chicago, IL 60612<br>UNITED STATES |

\* Did not randomize subjects

090177e1816ca80c\Approved\Approved On: 06-Oct-2010 15:16

| <u>Center</u> | <u>Principal Investigator</u> | <u>Co-Investigator(s)</u> | <u>Sub-Investigator(s)</u>                                                                                                                                                                                                                                                                                                                                                                                                                  | <u>Address(es)</u>                                                                                                                                                                                                | <u>Institutional Review Board or Ethics Committee Address(es)</u>                                                                                                        |
|---------------|-------------------------------|---------------------------|---------------------------------------------------------------------------------------------------------------------------------------------------------------------------------------------------------------------------------------------------------------------------------------------------------------------------------------------------------------------------------------------------------------------------------------------|-------------------------------------------------------------------------------------------------------------------------------------------------------------------------------------------------------------------|--------------------------------------------------------------------------------------------------------------------------------------------------------------------------|
| 1271          | Dr. Nathan C. Dean            |                           | Dr. Ali Ahmed<br>Anita Austin<br>Dr. Samuel Brown<br>Dr. David Dienhart<br>Heather Gallo<br>Dr. Edgar Garcia-Morales<br>Dr. Mark Goddard<br>Dr. Colin Grissom<br>Dr. Eliotte Hirshberg<br>Naresh Kumar<br>Dr. Russell Miller III.<br>Robert Muelleck<br>Dr. Patricia Nelson<br>Dr. James Orme Jr.<br>Dr. Sunny Pandita<br>Dr. Dean Roller<br>Leanne Struck<br>Dr. Don Van Boerum<br>Dr. Thomas White<br>Dr. Mark Zenger<br>Dr. John Zurasky | Intermountain Healthcare<br>Department of Pulmonary and<br>Critical Care Medicine<br>5121 S. Cottonwood Drive<br>Murray, UT 84157<br>UNITED STATES                                                                | Intermountain Healthcare<br>Intermountain Healthcare Urban<br>Central Region IRB<br>LDS Hospital<br>8th Avenue and C Street<br>Salt Lake City, UT 84143<br>UNITED STATES |
| 1272          | Adam Matthew Bressler         |                           | vorlak Hong<br>Dr. Avery Howard<br>Nathanson<br>Mark T. Pollock<br>Woratute Supaongprapa                                                                                                                                                                                                                                                                                                                                                    | Atlanta Institute for Medical<br>Research, Incorporated<br>Suite 220<br>495 Winn Way<br>Decatur, GA 30030<br>UNITED STATES<br><br>DeKalb Medical<br>2701 North Decatur Road<br>Decatur, GA 30033<br>UNITED STATES | DeKalb Medical Center Institutional<br>Review Board<br>2701 North Decatur Road<br>Decatur, GA 30033<br>UNITED STATES                                                     |
| 1274          | Nicholas J. Pastis            |                           | Tanna Cooper<br>Joe Mazur<br>Dr. Charlton Strange                                                                                                                                                                                                                                                                                                                                                                                           | Medical University of South<br>Carolina<br>96 Jonathan Lucas Street<br>Charleston, SC 29425<br>UNITED STATES                                                                                                      | Medical University IRB<br>Suite 601, MSC 857<br>19 Hagood Ave<br>Charleston, SC 29425<br>UNITED STATES                                                                   |

\* Did not randomize subjects

| <u>Center</u> | <u>Principal Investigator</u> | <u>Co-Investigator(s)</u> | <u>Sub-Investigator(s)</u>                                                                                                                                                                                                                                                            | <u>Address(es)</u>                                                                                                                                                                                                        | <u>Institutional Review Board or Ethics Committee Address(es)</u>                                                                                                                 |
|---------------|-------------------------------|---------------------------|---------------------------------------------------------------------------------------------------------------------------------------------------------------------------------------------------------------------------------------------------------------------------------------|---------------------------------------------------------------------------------------------------------------------------------------------------------------------------------------------------------------------------|-----------------------------------------------------------------------------------------------------------------------------------------------------------------------------------|
| 1275          | Michael H. Metzler            |                           | Dr. Ronald A. Shockley<br>Sheri Stucke                                                                                                                                                                                                                                                | Sunrise Hospital And Medical Center<br>3186 South Maryland Parkway<br>Las Vegas, NV 89109<br>UNITED STATES                                                                                                                | Sunrise Institutional Review Board<br>3186 South Maryland Parkway<br>Las Vegas, NV 89109<br>UNITED STATES                                                                         |
| 1276          | Dr. Philip M. Alapat          |                           | Dr. Bindu Akkanti<br>Dr. Venkata D. Bandi<br>Dr. Goutham Dronavalli<br>Dr. Kalpalatha<br>Kummamuri Guntupalli<br>Dr. Elizabeth S. Guy<br>Dr. Nicola Alexander<br>Hanania<br>Dr. Antara Mallampalli                                                                                    | Ben Taub General Hospital<br>1504 Taub Loop<br>Houston, TX 77030-1608<br>UNITED STATES                                                                                                                                    | Institutional Review Board for Human Subject Research<br>Baylor College of Medicine and Affiliated Hospitals<br>BCM 310<br>One Baylor Plaza<br>Houston, TX 77030<br>UNITED STATES |
| 1278          | Dr. Glen Boudier              |                           | Carol Hemmen<br>Benjamin Franklin Lewis<br>Jeffrey Spray                                                                                                                                                                                                                              | Winchester Medical Center<br>1840 Amherst Street<br>Winchester, VA 22601<br>UNITED STATES                                                                                                                                 | Winchester Medical Center<br>Institutional Review Board<br>1840 Amherst Street<br>Winchester, VA 22601<br>UNITED STATES                                                           |
| 1279 *        | Dr. William Patrick Tillis    |                           | Dr. Rosario Ruth Avelino<br>Rajesh Balagani<br>Subramanyam Chittivelu<br>Dr. Jeremiah Edward<br>Crabb VI<br>Athir Hajjar<br>Ms. Kimberly L. Hartwig<br>Dr. Michael Leroy Peil<br>Dr. William Anthony<br>Sauder<br>Ashley L. Scott<br>Harbhajan Singh<br>Dr. Patrick Eugene<br>Whitten | Illinois Lung and Critical Care Institute<br>Suite 200<br>1001 Main Street<br>Peoria, IL 61606<br>UNITED STATES<br><br>Saint Francis Medical Center<br>530 NorthEast Glen Oak Avenue<br>Peoria, IL 61637<br>UNITED STATES | University of Illinois College of Medicine at Peoria Institutional Review Board<br>Box 1649<br>One Illini Drive<br>Peoria, IL 61656-1649<br>UNITED STATES                         |

\* Did not randomize subjects

| <u>Center</u> | <u>Principal Investigator</u> | <u>Co-Investigator(s)</u> | <u>Sub-Investigator(s)</u>                                                                                                                                                    | <u>Address(es)</u>                                                                                               | <u>Institutional Review Board or Ethics Committee Address(es)</u>                                                                                                                                                            |
|---------------|-------------------------------|---------------------------|-------------------------------------------------------------------------------------------------------------------------------------------------------------------------------|------------------------------------------------------------------------------------------------------------------|------------------------------------------------------------------------------------------------------------------------------------------------------------------------------------------------------------------------------|
| 1285          | Dr. Ernest Eugene Moore Jr.   |                           | Lee Anne Ammons<br>Carlton Carter Barnett<br>Walter L. Biffl<br>Catherine Cothren<br>Laura Fahrenbrook<br>James B. Haenel<br>Jeffrey Leon Johnson<br>Gervaise Edward Kimm Jr. | Denver Health Medical Center<br>Department of Surgery<br>777 Bannock Street<br>Denver, CO 80204<br>UNITED STATES | University of Colorado<br>13001 E. 17th Place<br>Building 500, Rm N3214<br>Aurora, CO 80010<br>UNITED STATES<br><br>Western Institutional Review Board,<br>Inc.<br>3535 Seventh Ave SW<br>Olympia, WA 98508<br>UNITED STATES |

090177e1816ca80c\Approved\Approved On: 06-Oct-2010 15:16

\* Did not randomize subjects

**Venezuela****Coordinating Investigators:**

Dr. Dolores Moreno

Dra. Bernardina Sumoza

| <u>Center</u> | <u>Principal Investigator</u> | <u>Co-Investigator(s)</u> | <u>Sub-Investigator(s)</u> | <u>Address(es)</u>                                                                                                                                                                   | <u>Institutional Review Board or Ethics Committee Address(es)</u>                                                                                                                                                                   |
|---------------|-------------------------------|---------------------------|----------------------------|--------------------------------------------------------------------------------------------------------------------------------------------------------------------------------------|-------------------------------------------------------------------------------------------------------------------------------------------------------------------------------------------------------------------------------------|
| 1053 *        | Dr. Gur Yehuda Levy           |                           | Carlos Talamo              | Hospital Universitario de Caracas<br>Servicio de Neumonología. Piso 8.<br>Los Chaguaramos<br>Universidad Central de Venezuela. UCV.<br>Caracas, Distrito Capital 1041<br>VENEZUELA   | Instituto Autónomo. Hospital Universitario de Caracas<br>Comité de Ética.<br>Universidad Central de Venezuela. UCV<br>Los Chaguaramos<br>Caracas, Distrito Capital 1041<br>VENEZUELA                                                |
| 1055 *        | Dr. Jairo Pacheco             |                           | Dr. Orlando Nava           | Hospital Clínico de Maracaibo<br>Servicio de Infectología<br>Avenida 15 con Calle 59<br>Urbanización Trinidad.<br>Prolongación Delicias<br>Maracaibo, Estado Zulia 4002<br>VENEZUELA | Comité de Ética del Hospital Clínico de Maracaibo.<br>Comité de Ética Hospital Clínico de Maracaibo<br>Avenida 15 con Calle 59.<br>Urbanización La Trinidad.<br>Prolongación Delicias.<br>Maracaibo, Estado Zulia 4002<br>VENEZUELA |
